# Supplementary material for: 3d(Fe)-5d(W) diatomic hybrid oxygen electrocatalysts enables ultra-stable operation of rechargeable zinc-air batteries for over 10,000 h
Source: Research Square preprint supplement (doi:10.21203/rs.3.rs-5530445/v1), 2025-01-15
Supplement: Supplementary file 1 [file fa38d8268c6c0de4ea45ea3d.docx]

**Supplementary Information**

3d(Fe)-5d(W) diatomic hybrid oxygen electrocatalysts enables ultra-stable operation of rechargeable zinc-air batteries for over 10,000 h

Yifan Li1, Hanlin Wang1, Chang Chen2, Xuesong Xie1, Yang Yang1, Xuehai Tan1, Keren Jiang1, Ning Chen3, Hao Zhang1*, Zhi Li1*

*1Department of Chemical and Materials Engineering, University of Alberta, Edmonton, Alberta T6G 1H9, Canada*

*2Engineering Research Center of Advanced Rare Earth Materials, Department of Chemistry, Tsinghua University, Beijing, 100000, China*

*3Hard X-Ray Micro Analysis BL, Canadian Light Source Saskatoon, Saskatchewan, S7N 2V3 Canada*

Contents:

Supplementary Figure 1-29

Supplementary Table 1-7

Supplementary Reference 1-32

**Supplementary Figures**

**
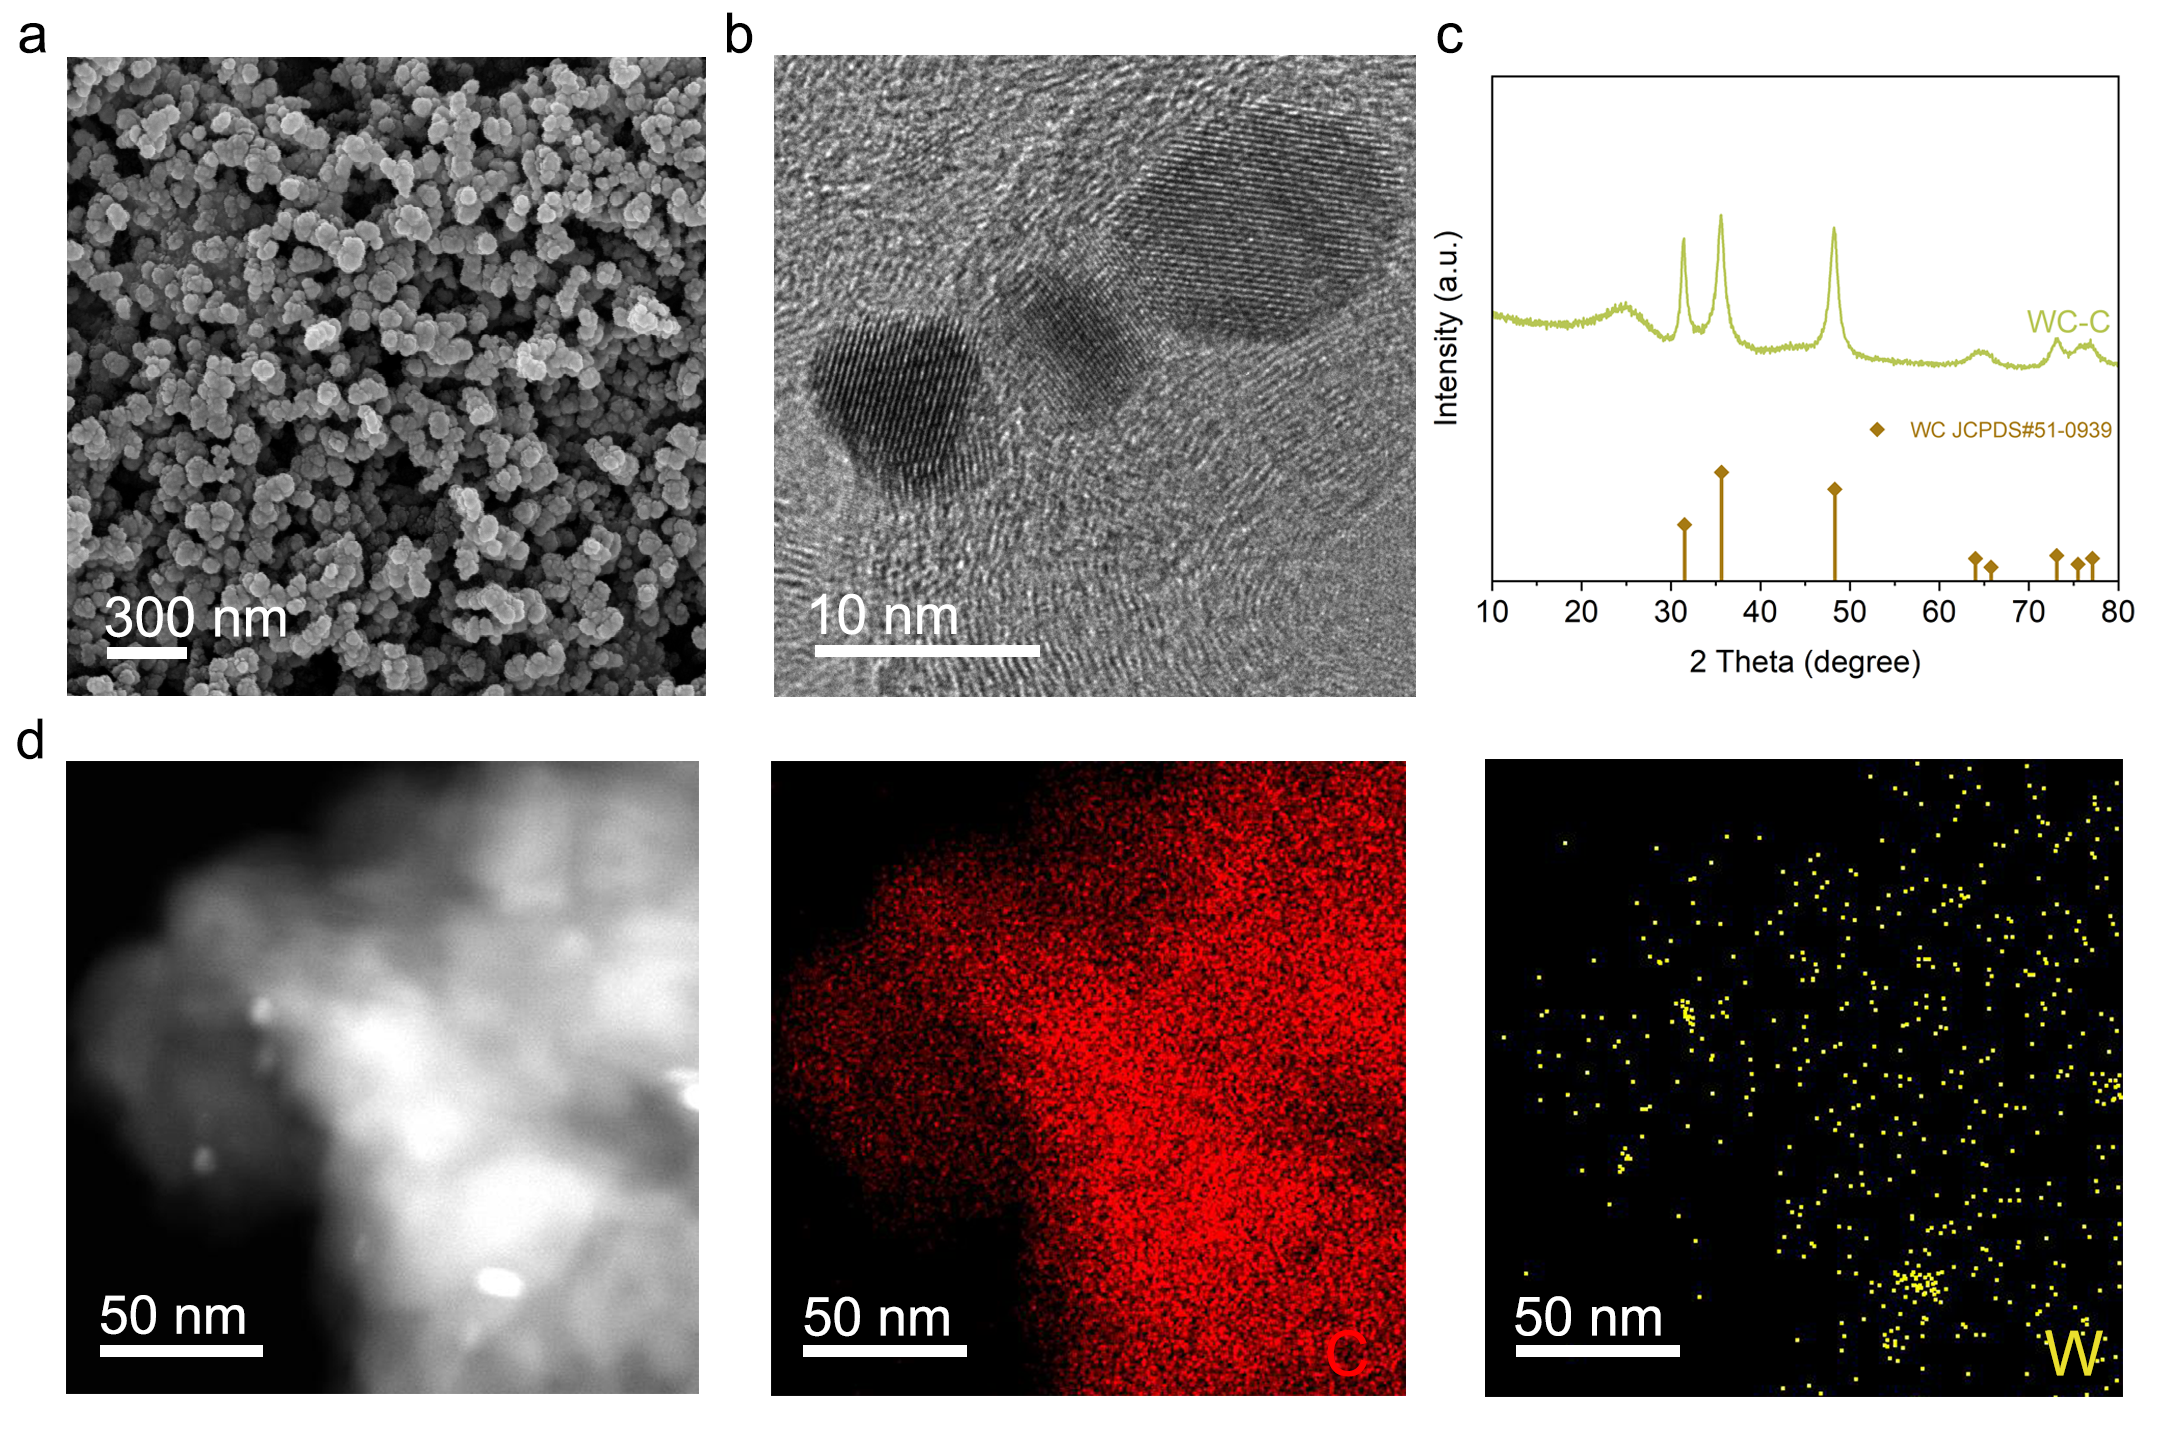
**

**Supplementary Fig. 1.** Morphological characterizations of WC-C catalyst. **a**, Scanning electron microscopy (SEM) image. **b**, Transmission electron microscopy (TEM) image. **c**, X-ray diffraction (XRD) pattern. **d**, High-angle annular dark-field scanning transmission electron microscopy (HAADF-STEM) image and corresponding energy-dispersive X-ray spectroscopy (EDX) mapping images for C (red) and W (yellow).

**
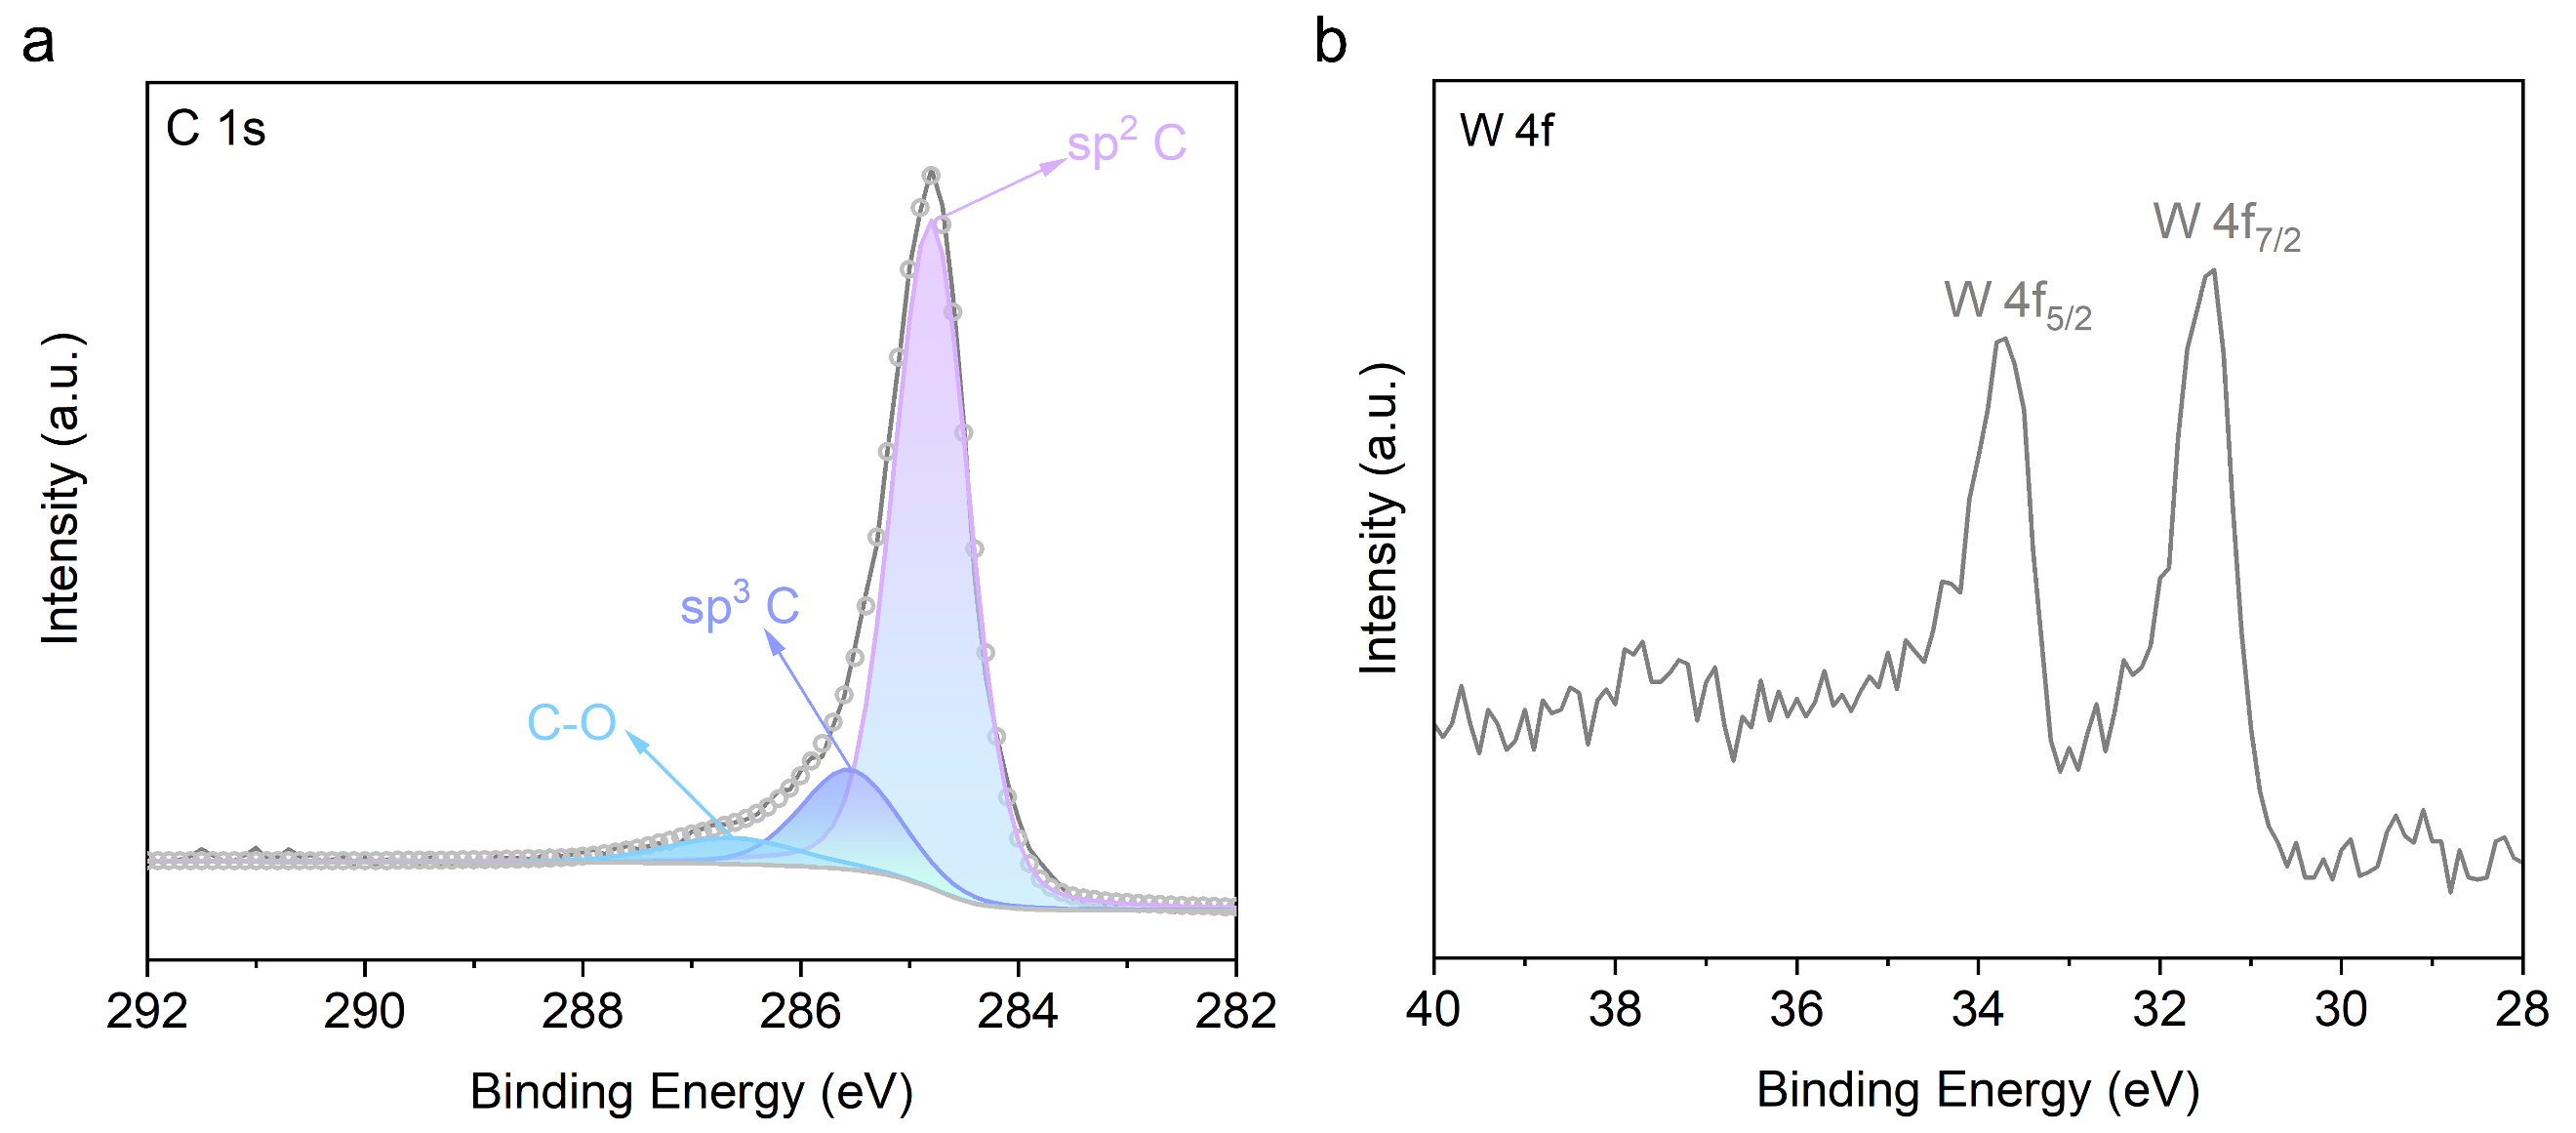
**

**Supplementary Fig. 2.** X-ray photoelectron spectroscopy (XPS) analysis of WC-C catalyst. **a**, High-resolution XPS spectrum of C 1s. **b**, High-resolution XPS spectrum of W 4f.

**
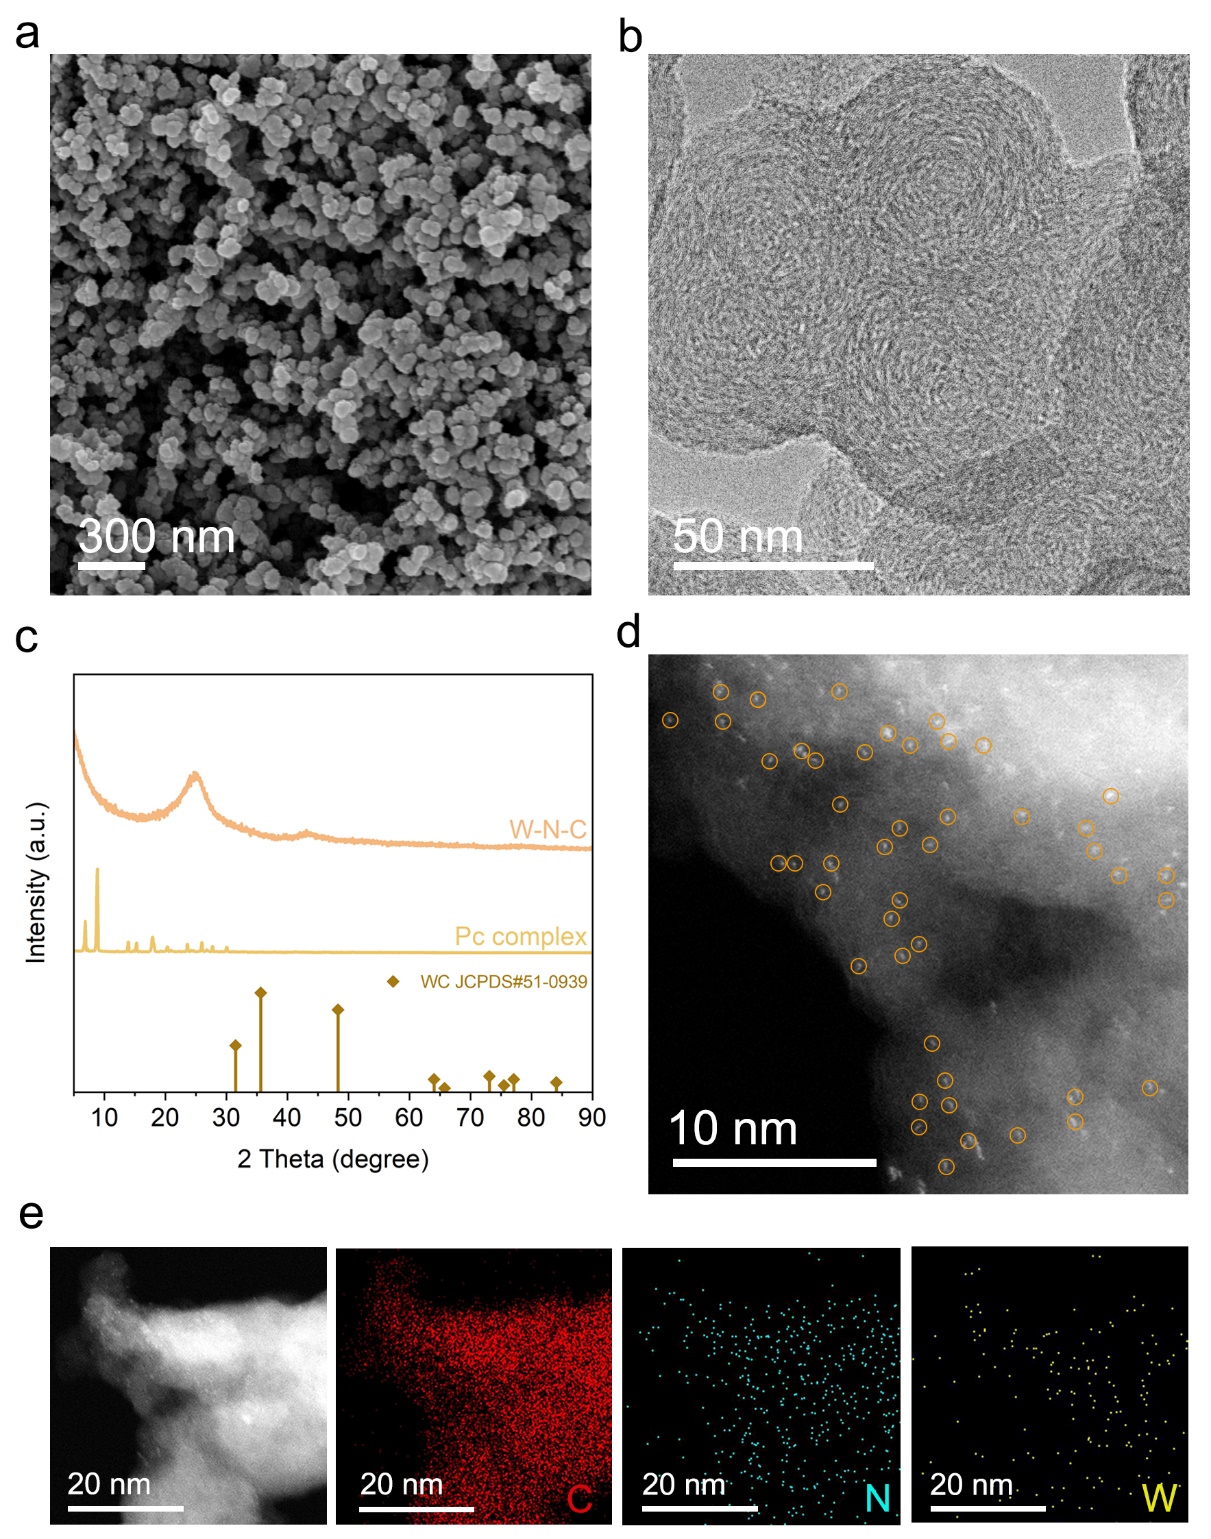
**

**Supplementary Fig. 3.** Morphological characterizations of W-N-C catalyst. **a**, SEM image. **b**, TEM image. **c**, XRD patterns of W-N-C catalyst and phthalocyanine crystalline complex (Pc complex). **d**, Aberration-corrected HAADF-STEM image. **e**, HAADF-STEM image and corresponding EDX mapping images for C (red), N (blue) and W (yellow).

**
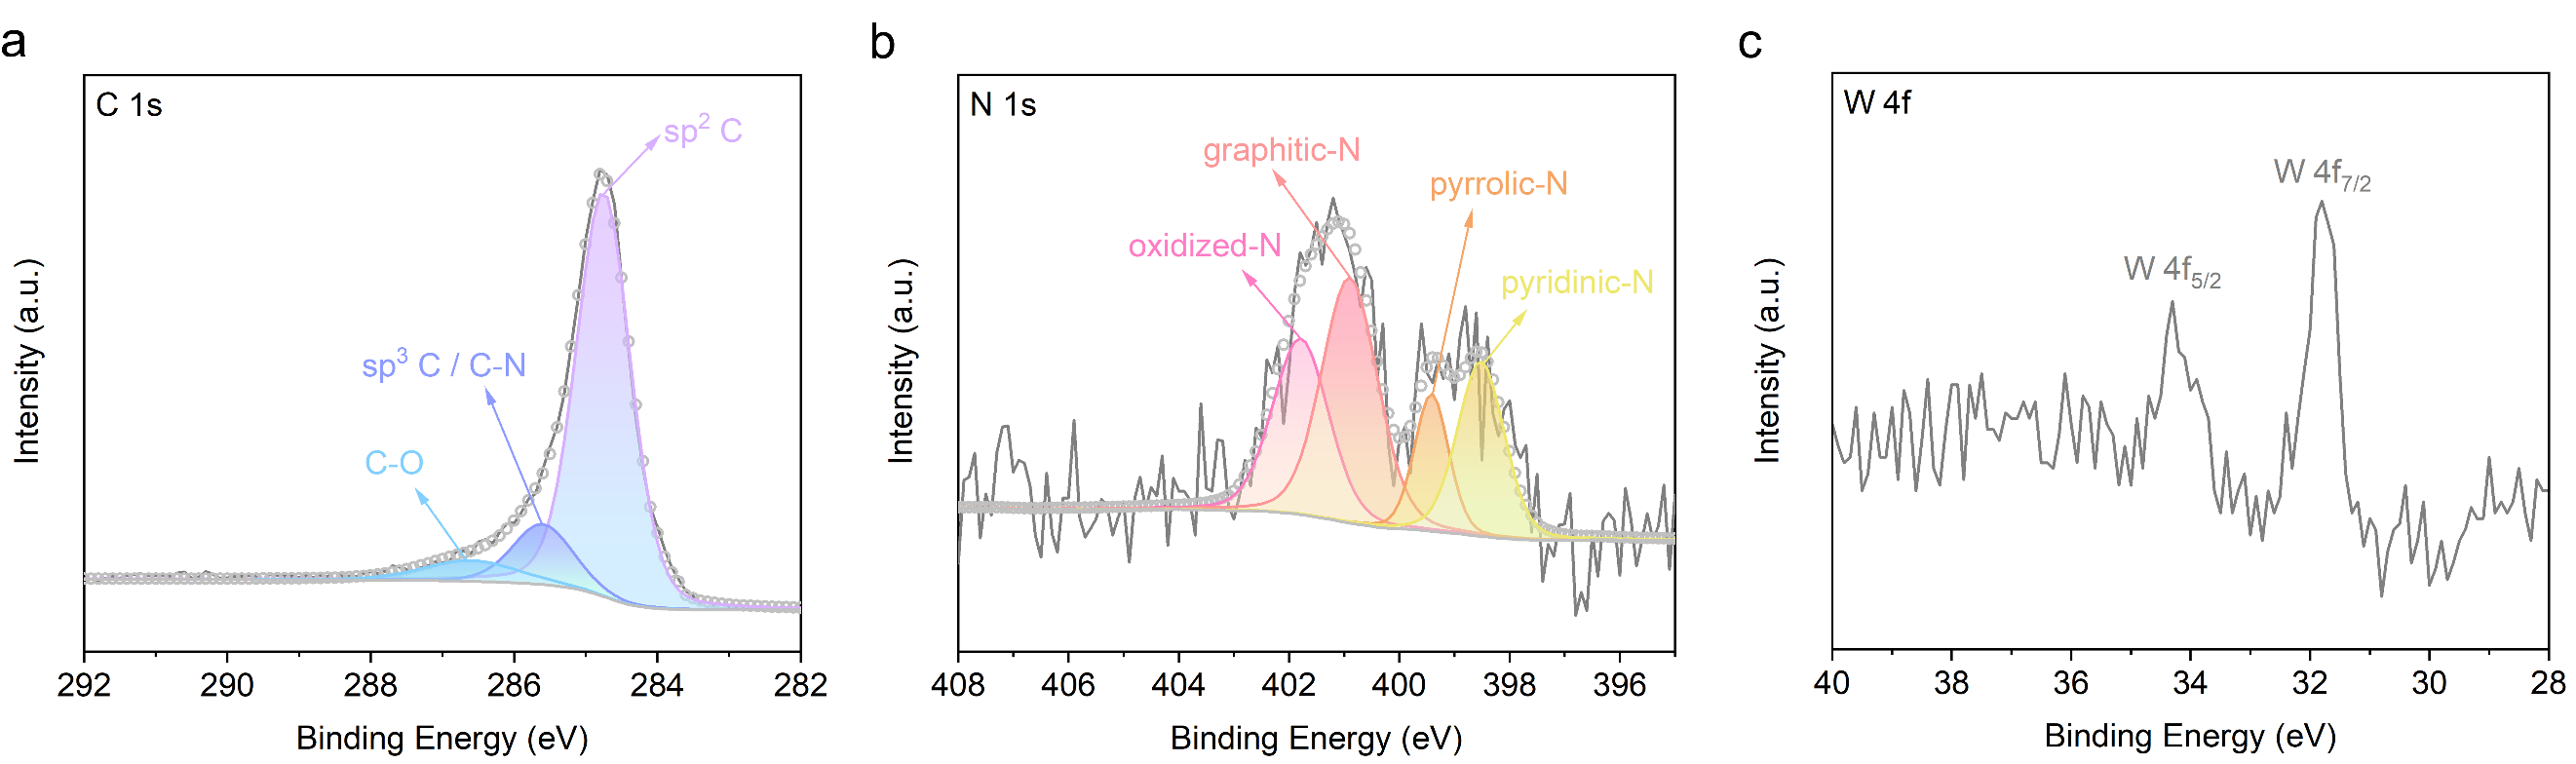
**

**Supplementary Fig. 4.** XPS analysis of W-N-C catalyst. **a**, High-resolution XPS spectrum of C 1s. **b**, High-resolution XPS spectrum of N 1s. **c**, High-resolution XPS spectrum of W 4f.

**
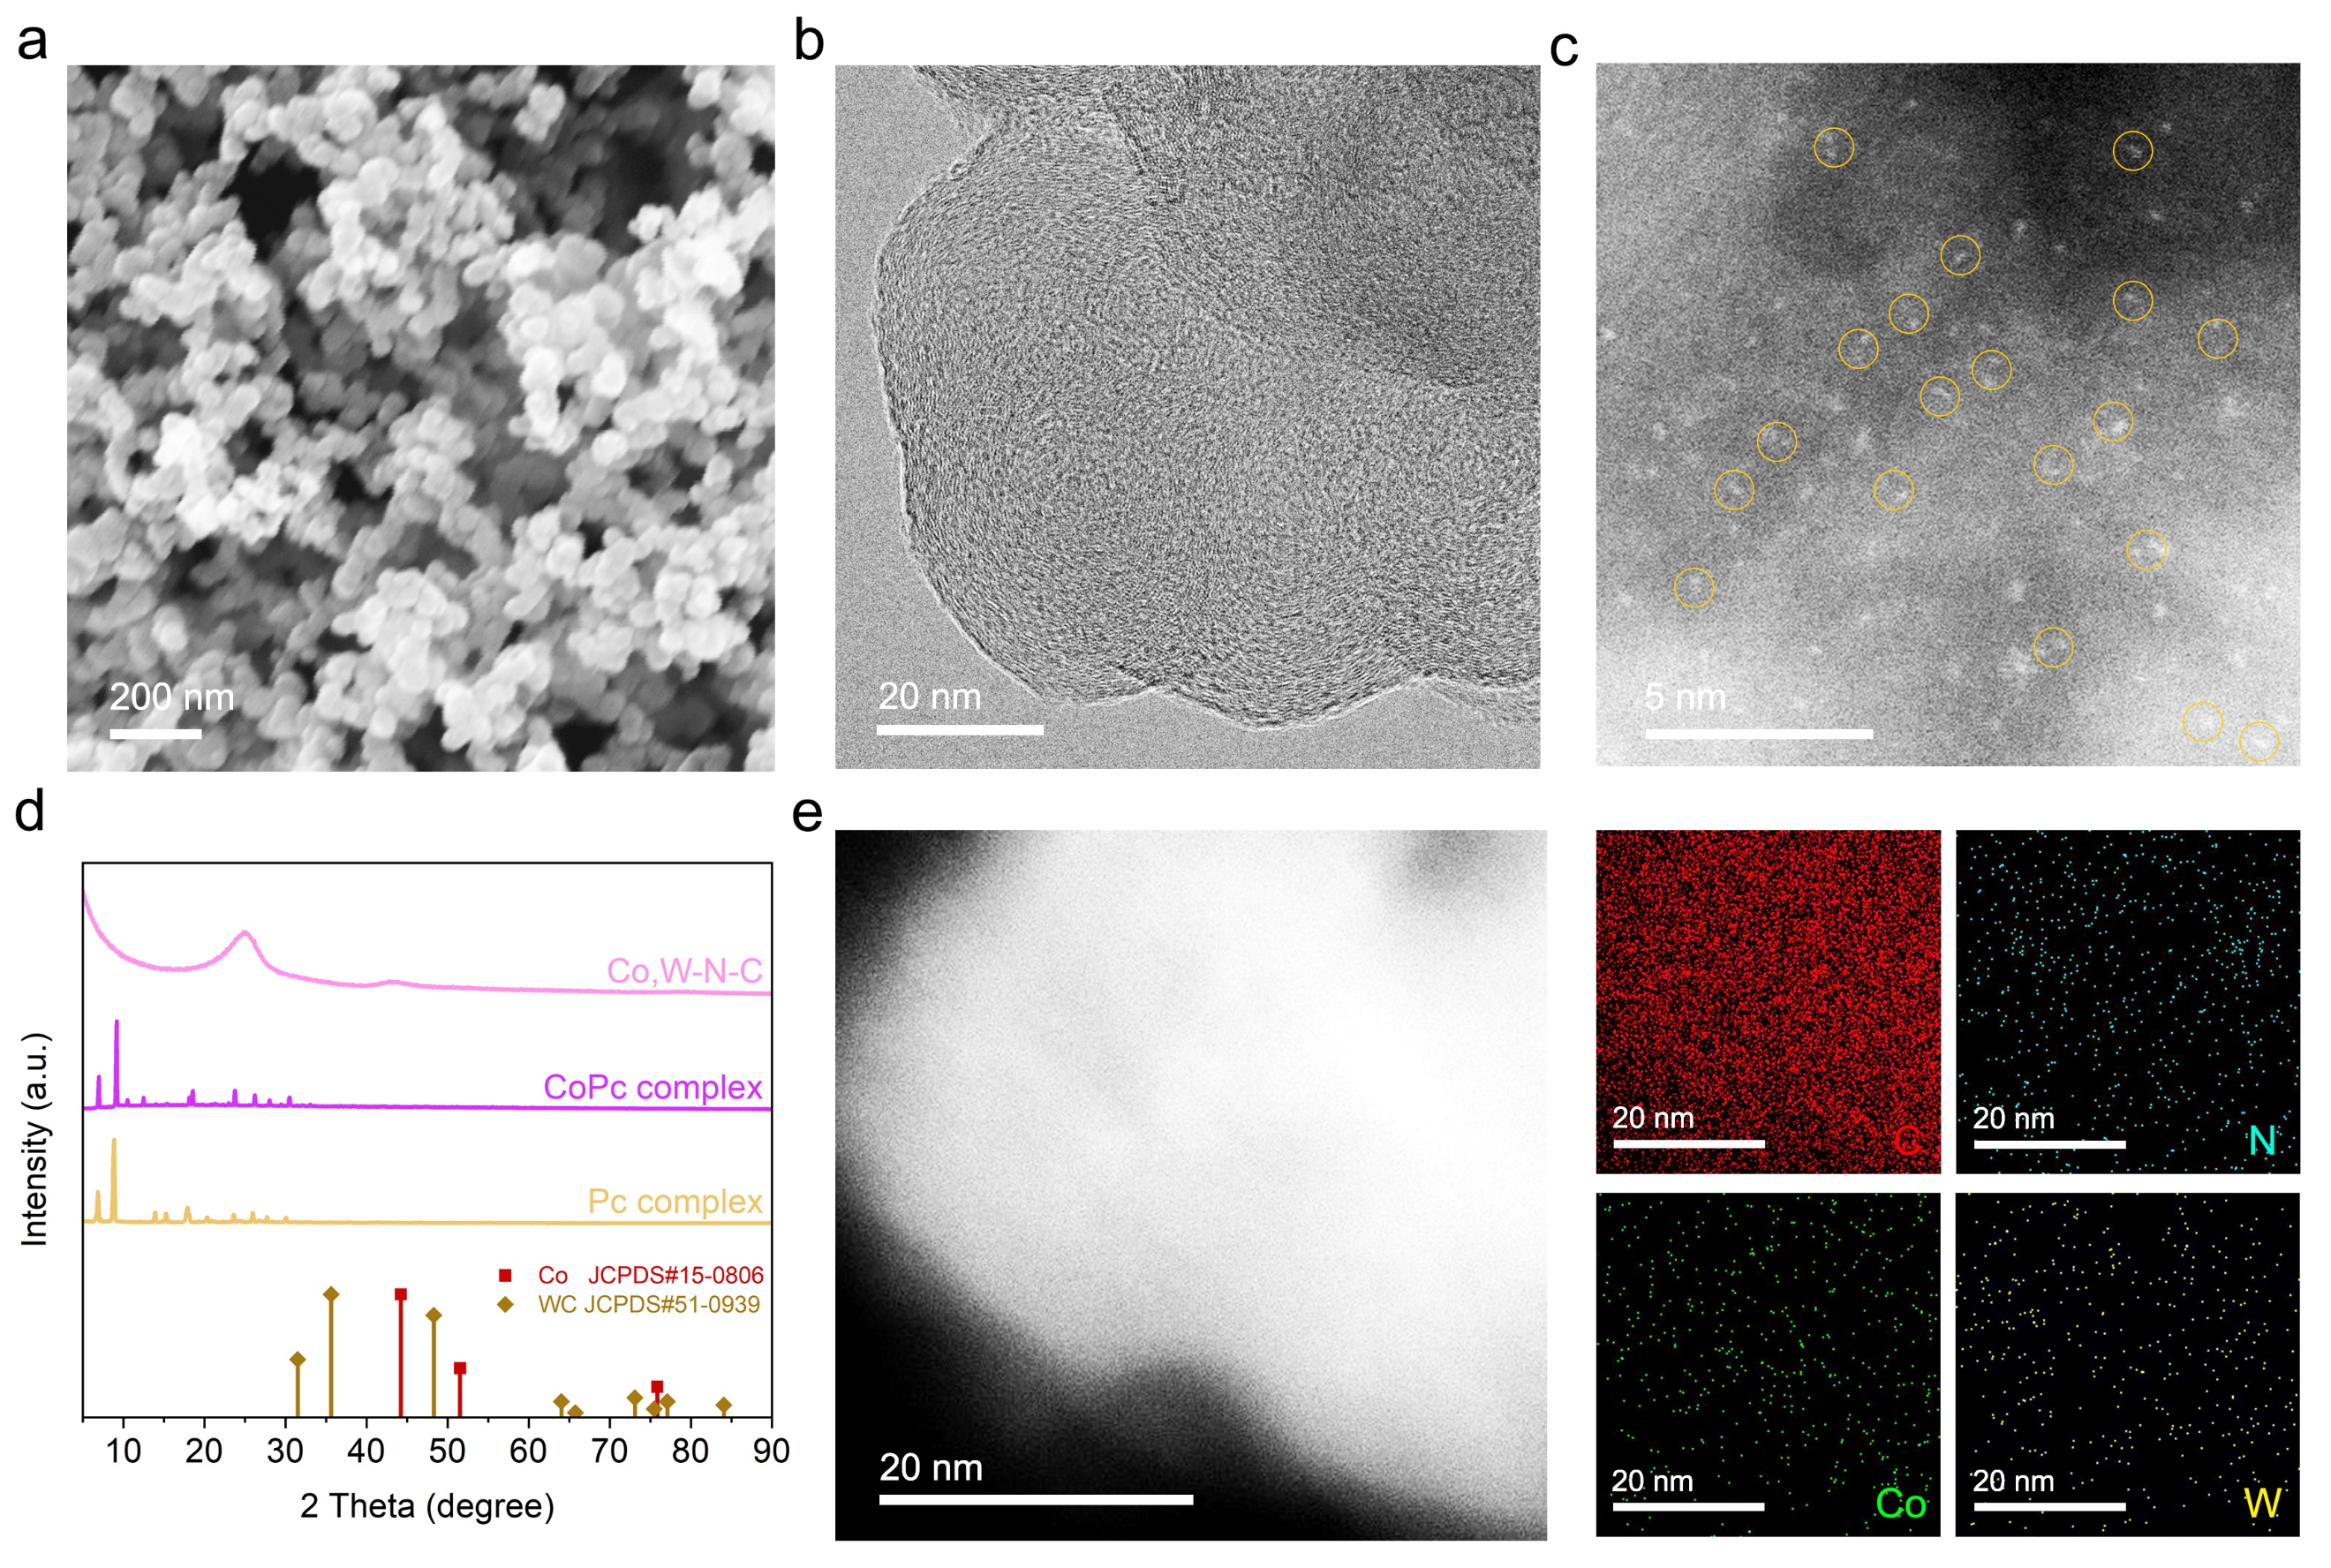
**

**Supplementary Fig. 5.** Morphological characterizations of Co,W-N-C catalyst. **a**, SEM image. **b**, TEM image. **c**, Aberration-corrected HAADF-STEM image. **d**, XRD patterns of Co,W-N-C catalyst, cobalt (Ⅱ) phthalocyanine complex (CoPc complex) and Pc complex. **e**, HAADF-STEM image and corresponding EDX mapping images for C (red), N (blue), Co (green) and W (yellow).

**
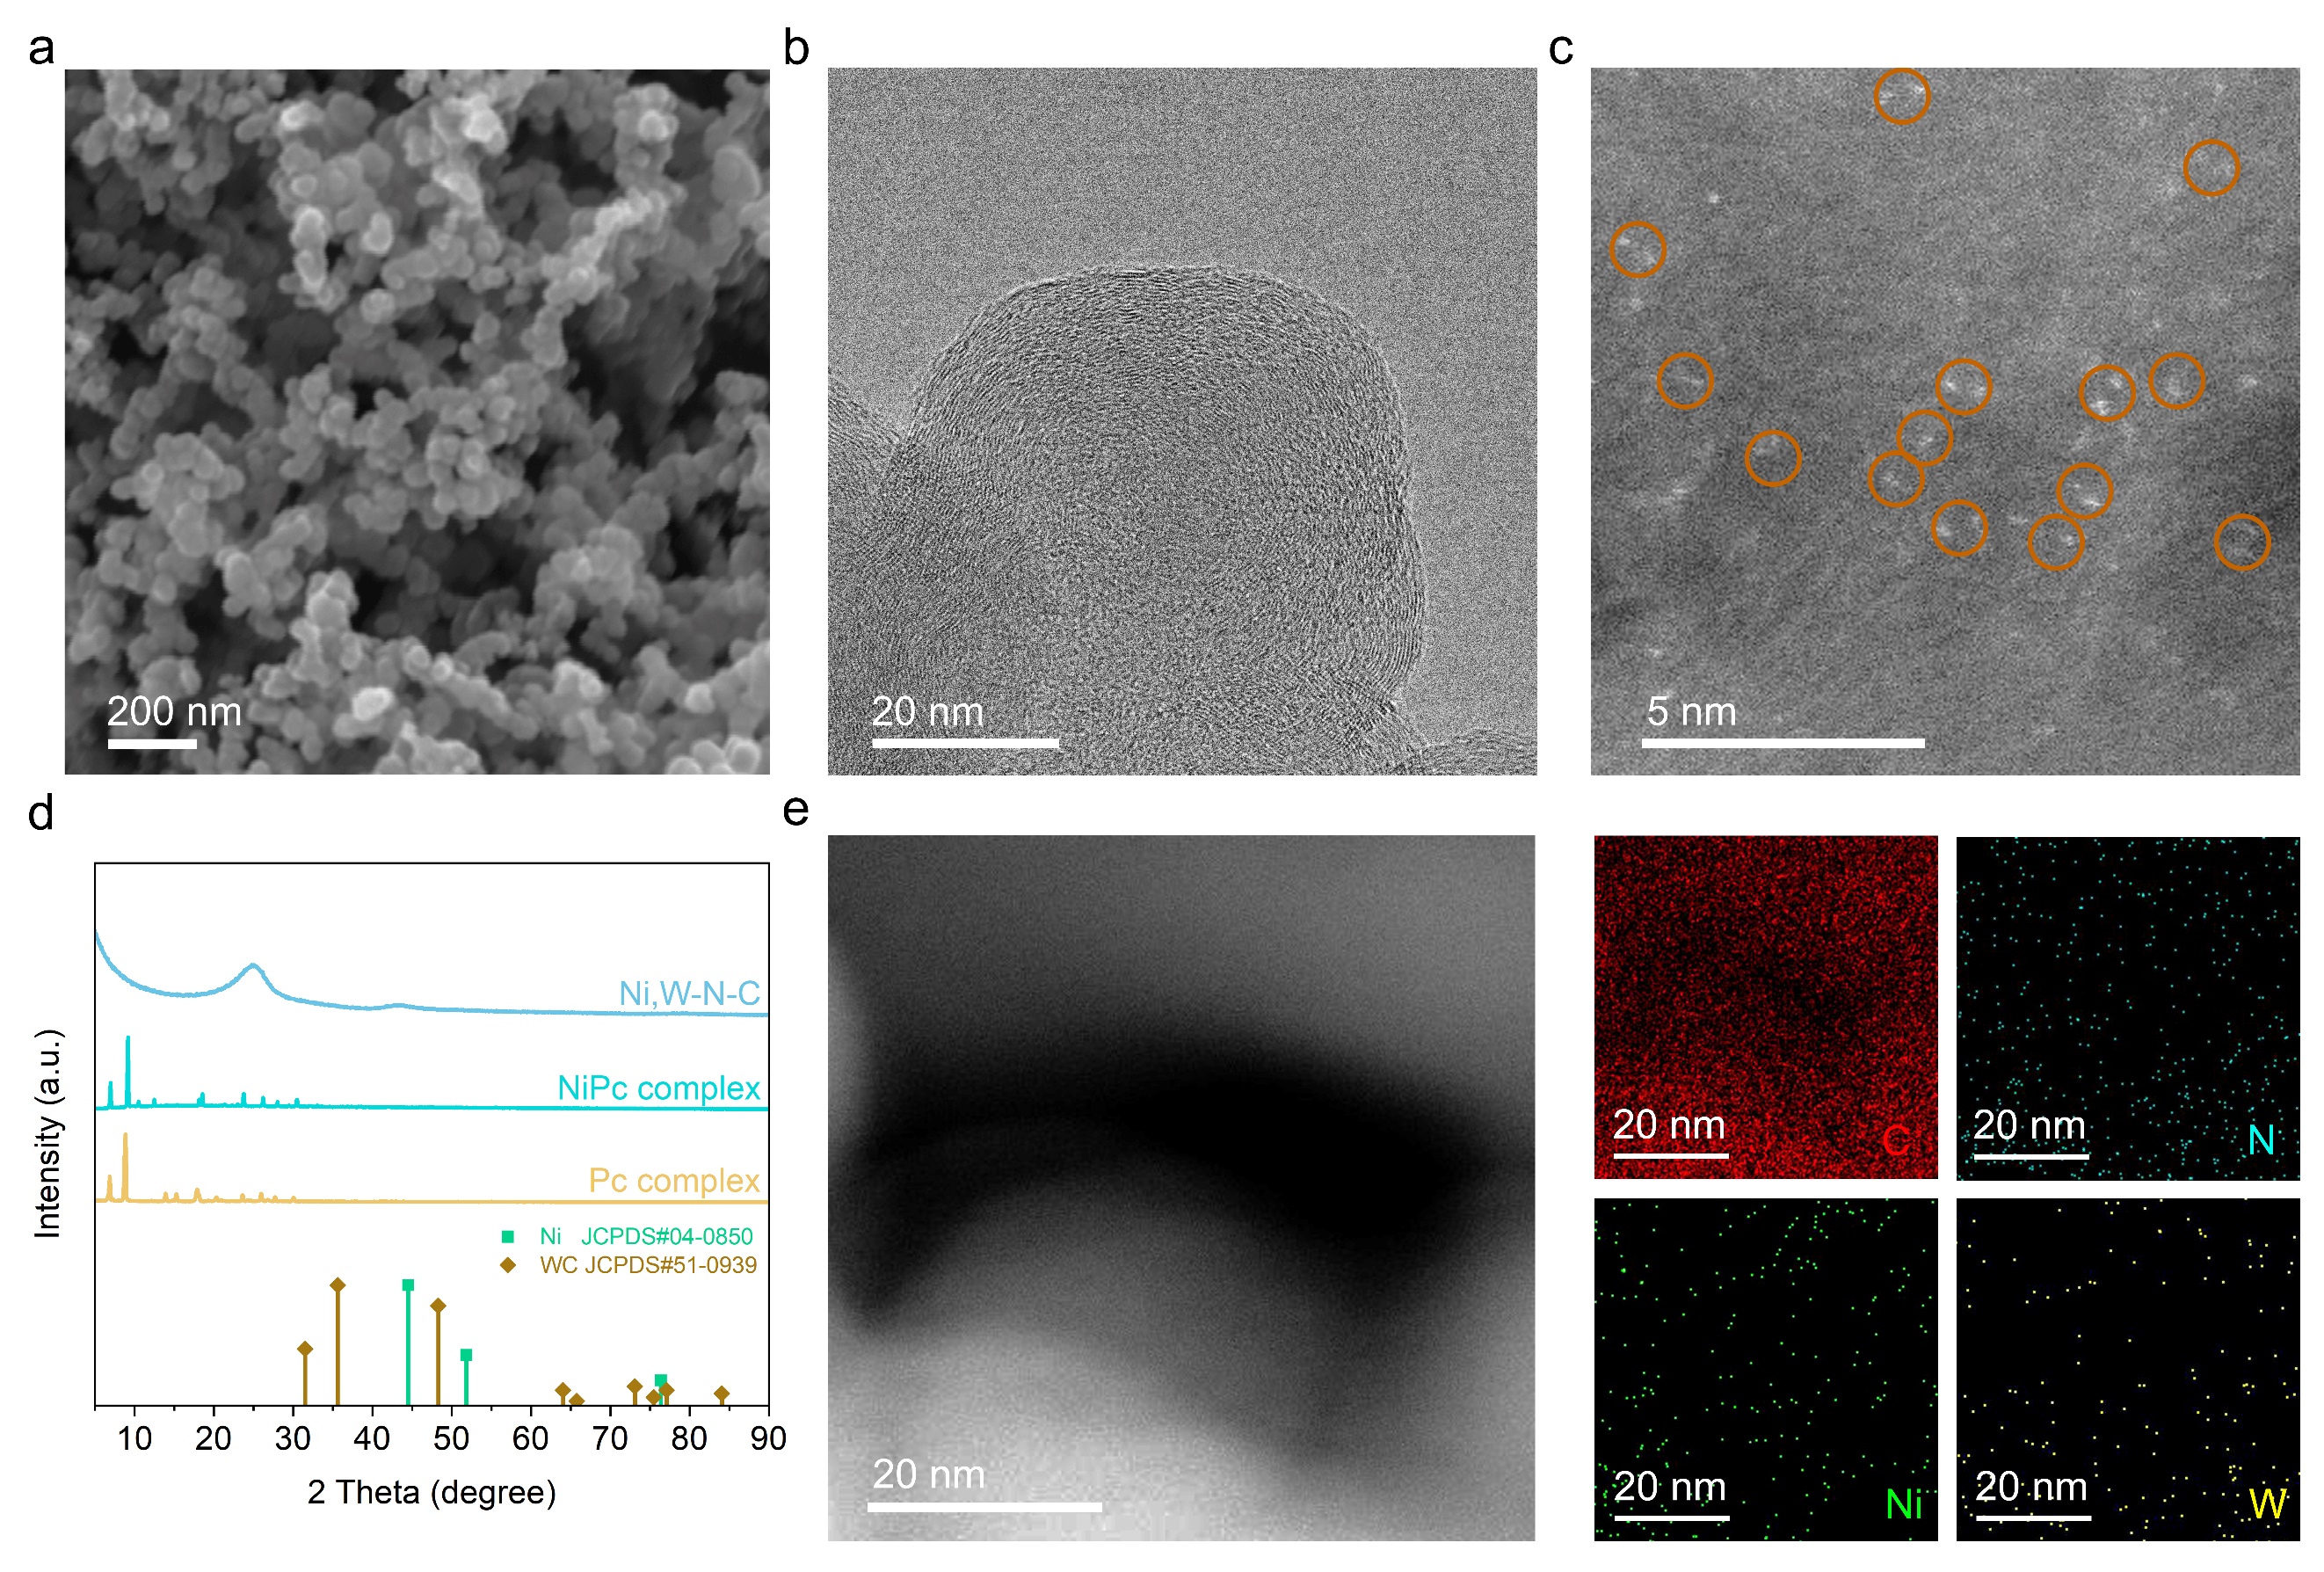
**

**Supplementary Fig. 6.** Morphological characterizations of Ni,W-N-C catalyst. **a**, SEM image. **b**, TEM image. **c**, Aberration-corrected HAADF-STEM image. **d**, XRD patterns of Ni,W-N-C catalyst, nickel phthalocyanine complex (NiPc complex) and Pc complex. **e**, HAADF-STEM image and corresponding EDX mapping images for C (red), N (blue), Ni (green) and W (yellow).


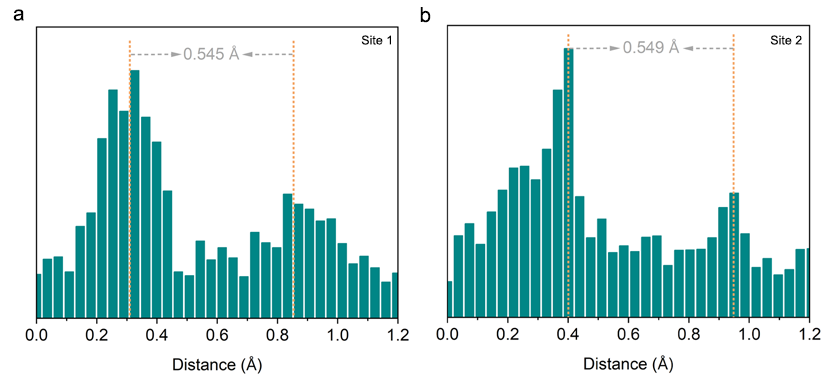


**Supplementary Fig. 7.** Distance between two adjacent metal atoms in site 1 (a) and site 2 (b).

**
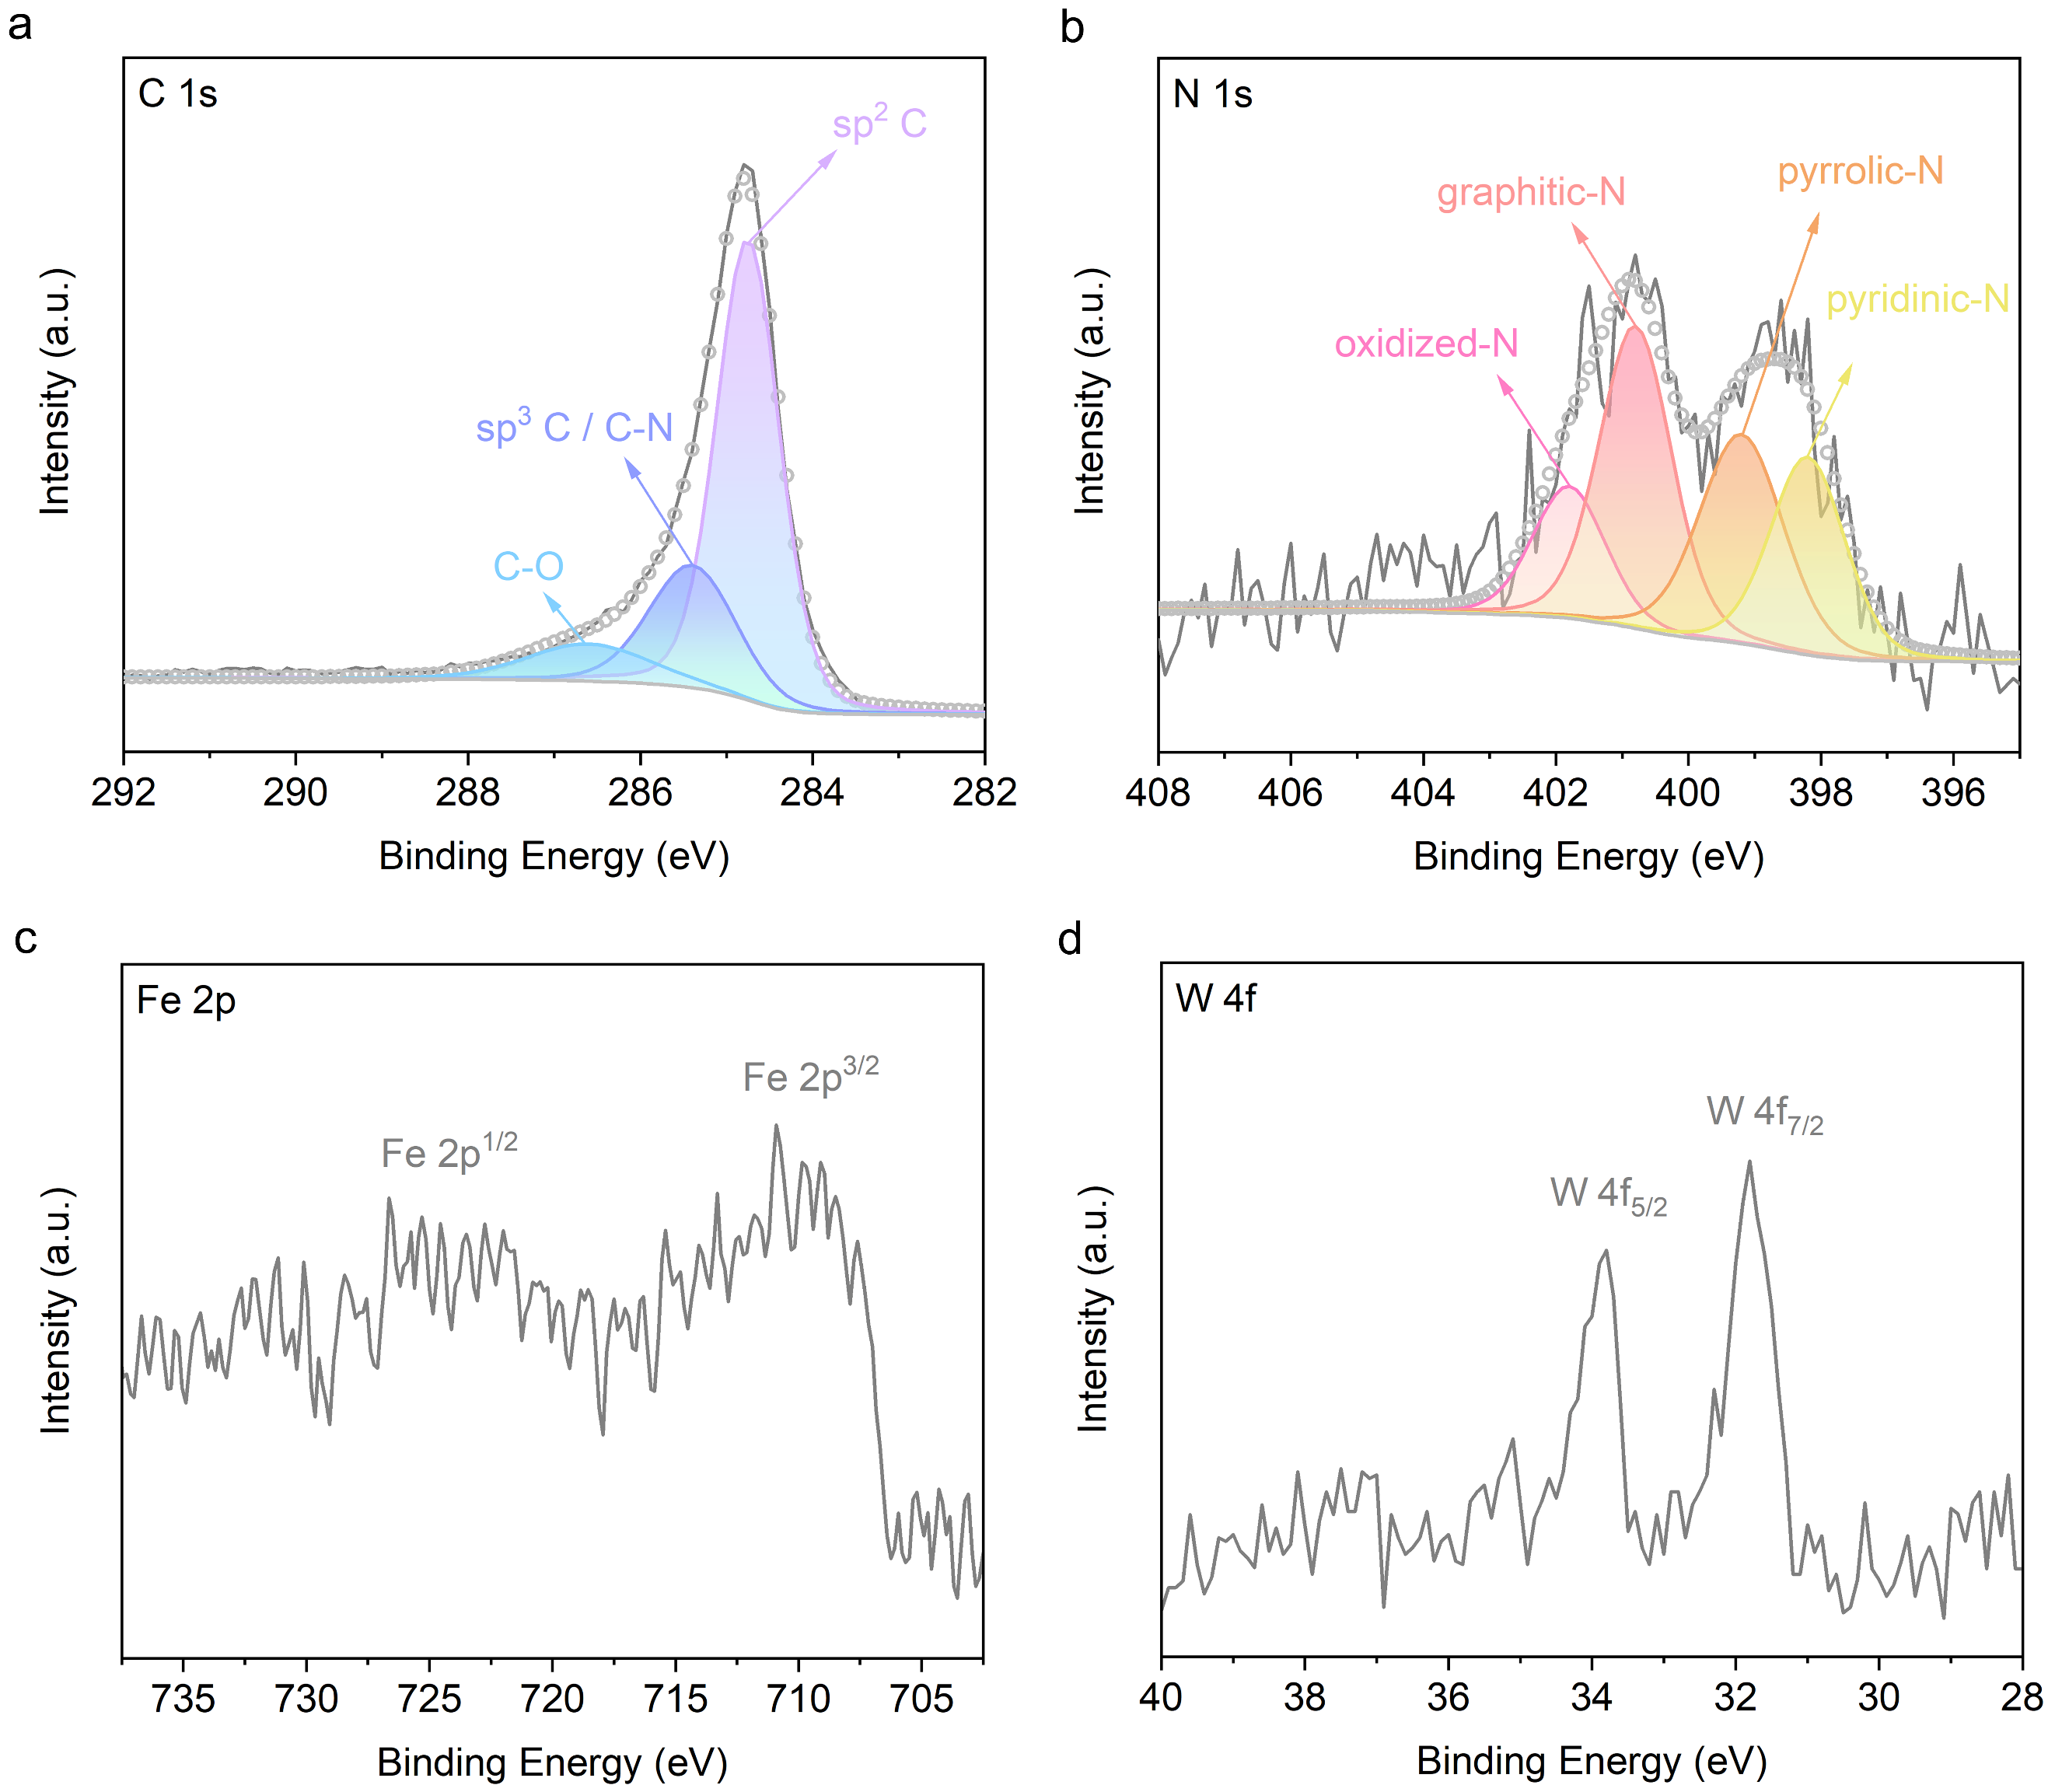
**

**Supplementary Fig. 8.** XPS analysis of Fe,W-N-C catalyst. **a**, High-resolution XPS spectrum of C 1s. **b**, High-resolution XPS spectrum of N 1s. **c**, High-resolution XPS spectrum of Fe 2p. **d**, High-resolution XPS spectrum of W 4f.

**
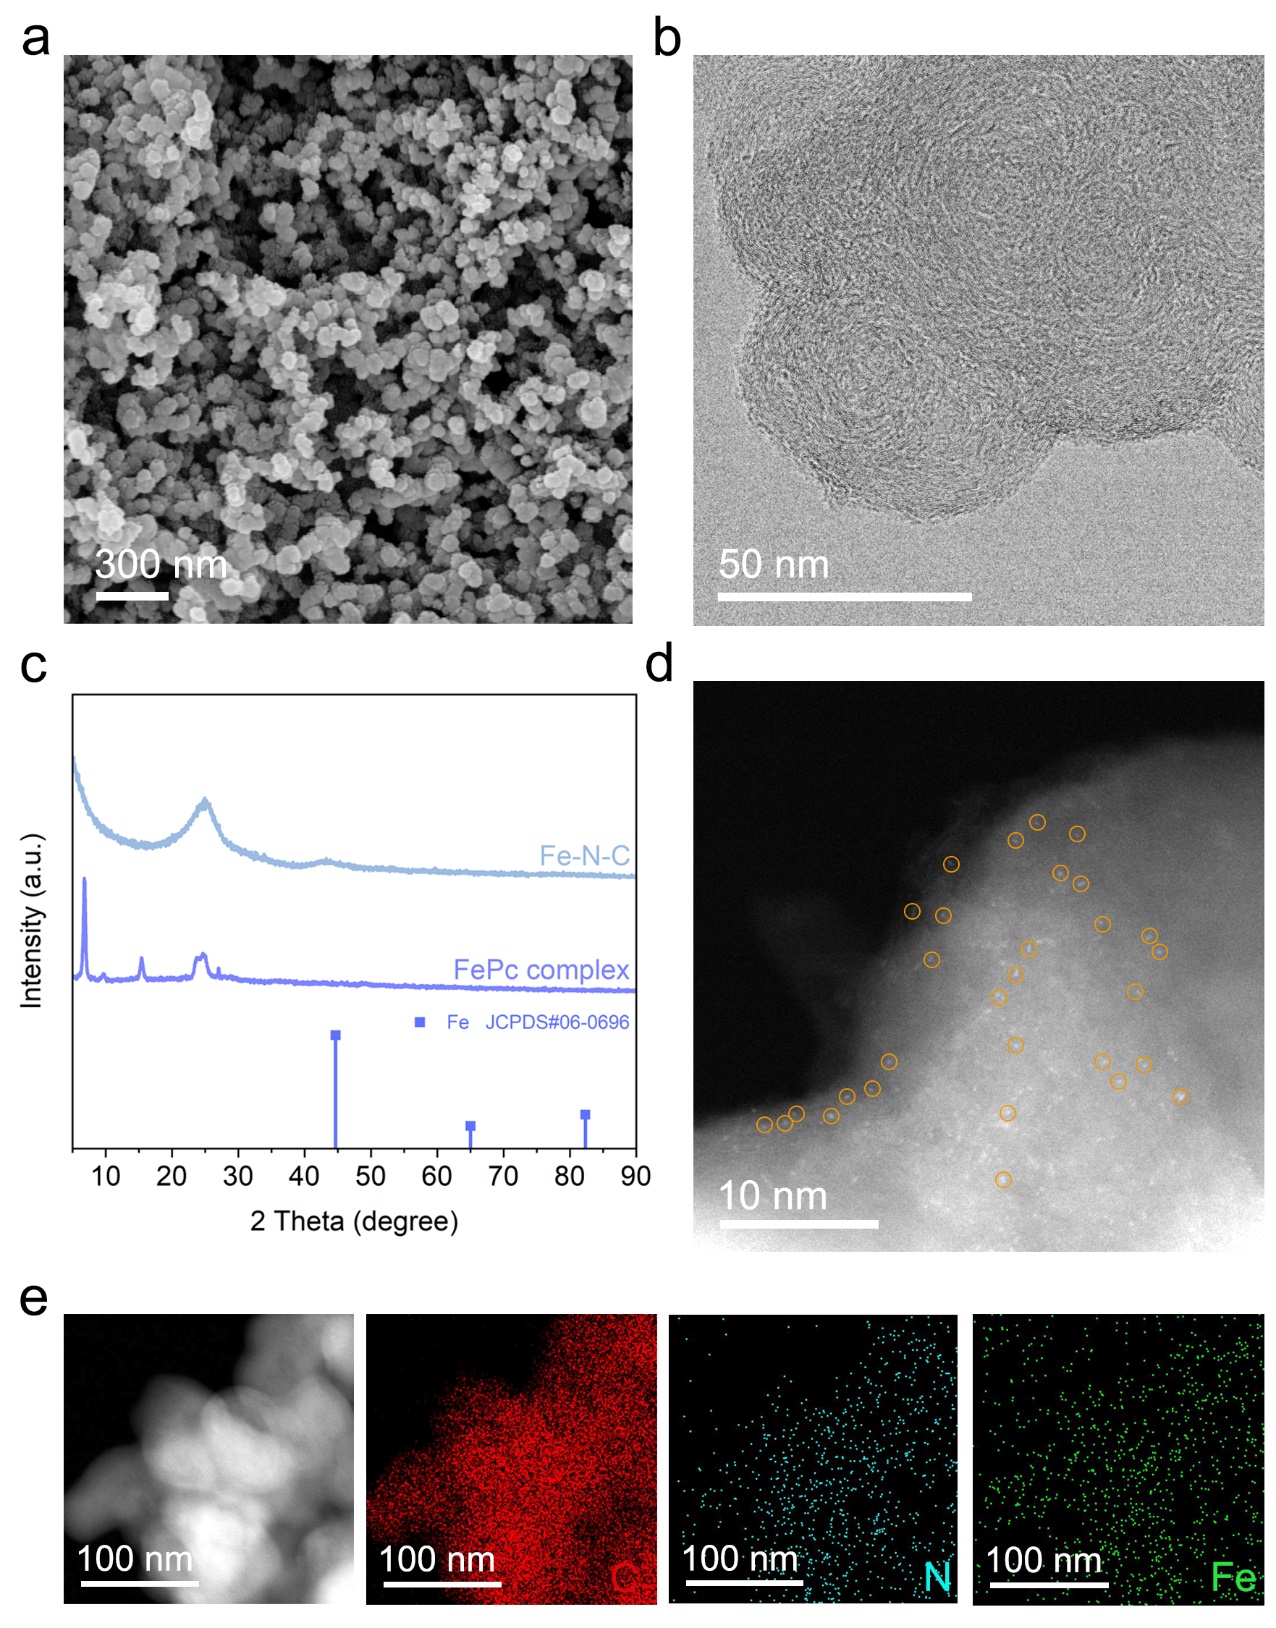
**

**Supplementary Fig. 9.** Morphological characterizations of Fe-N-C catalyst. **a**, SEM image. **b**, TEM image. **c**, XRD patterns of Fe-N-C catalyst and iron (Ⅱ) phthalocyanine complex (FePc complex). **d**, Aberration-corrected HAADF-STEM image. **e**, HAADF-STEM image and corresponding EDX mapping images for C (red), N (blue) and Fe (green).

**
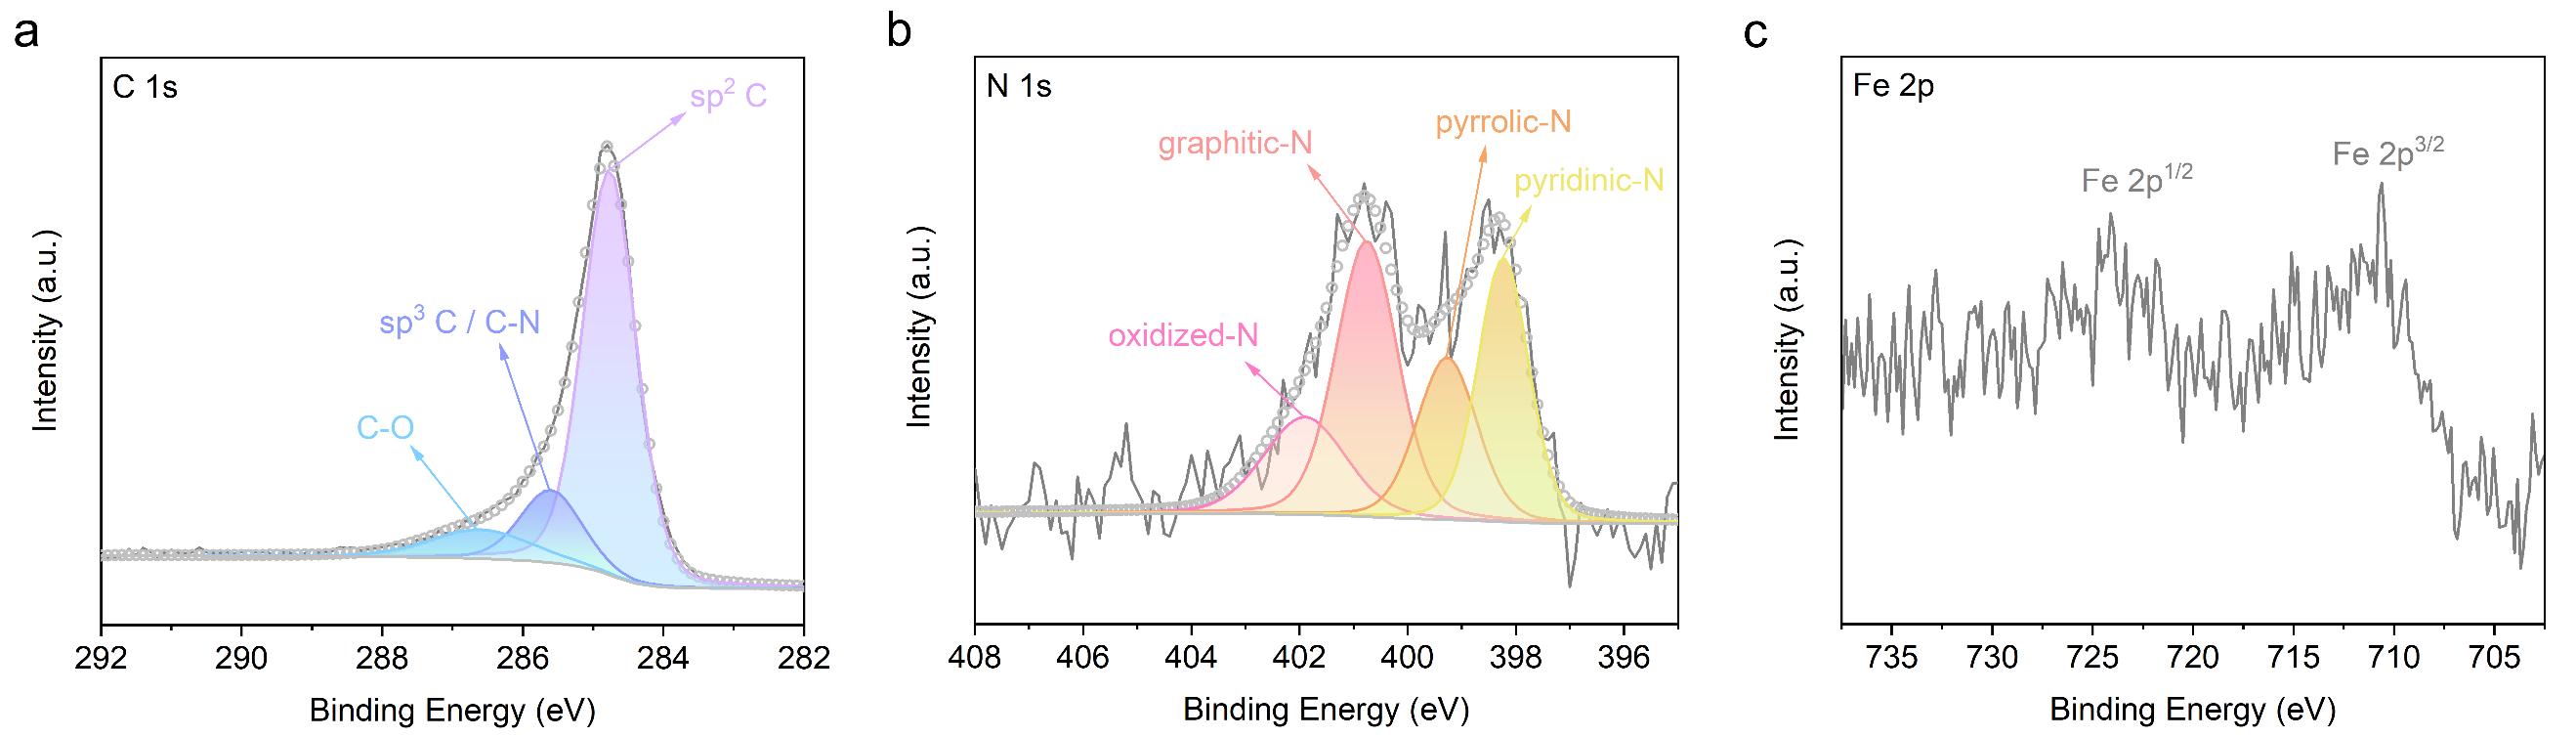
**

**Supplementary Fig. 10.** XPS analysis of Fe-N-C catalyst. **a**, High-resolution XPS spectrum of C 1s. **b**, High-resolution XPS spectrum of N 1s. **c**, High-resolution XPS spectrum of Fe 2p.

**
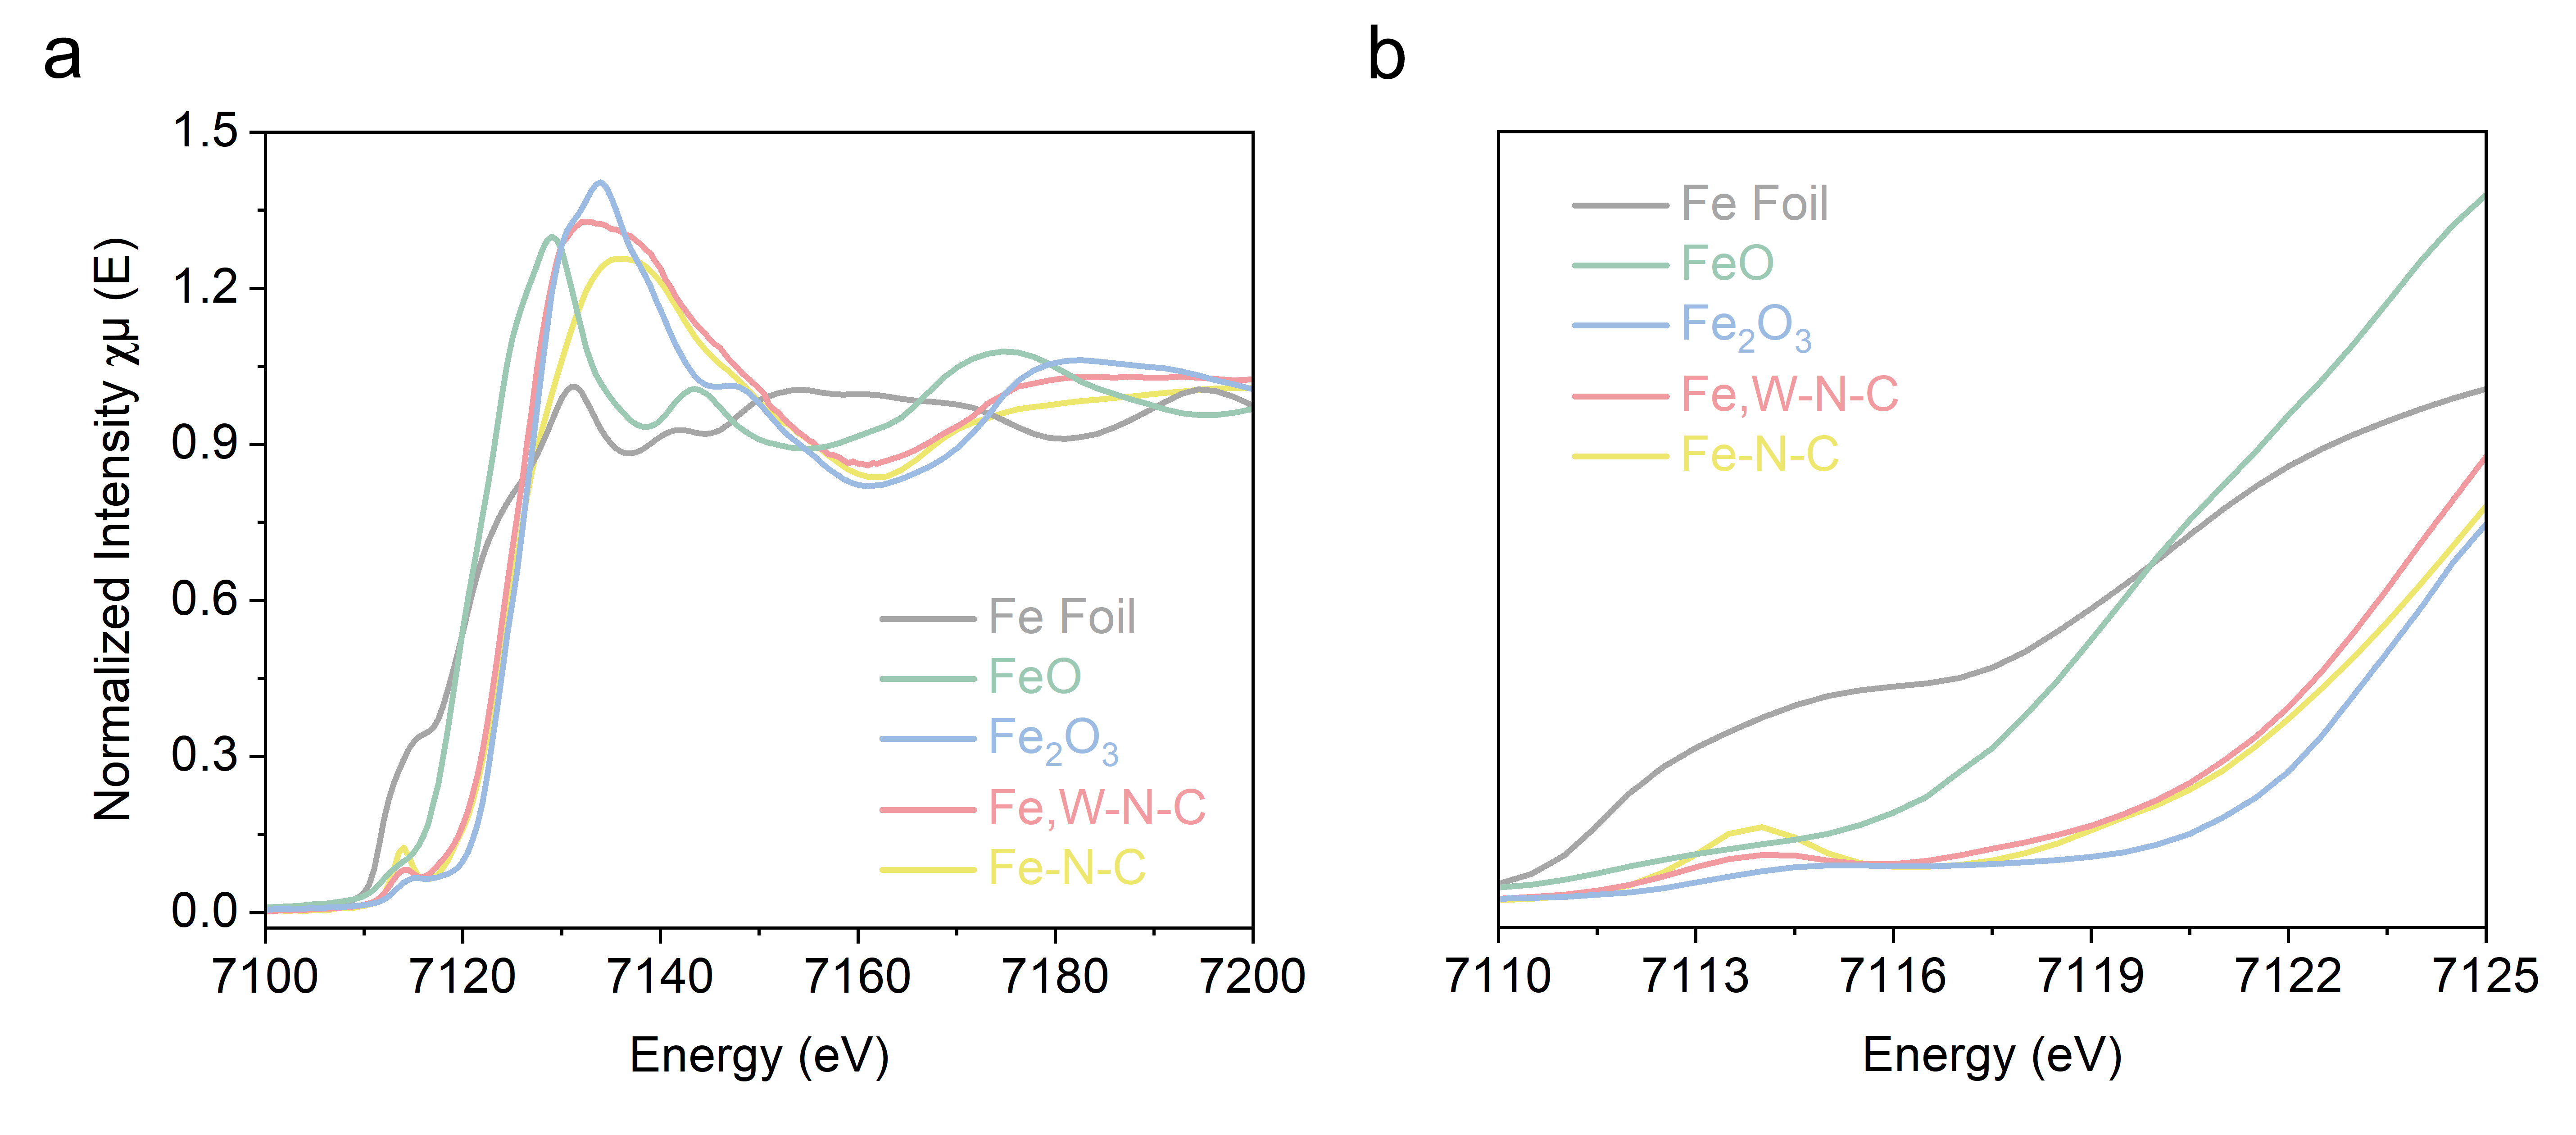
**

**Supplementary Fig. 11.** **a**,Normalized Fe K-edge X-ray absorption near-edge structure (XANES) spectra of Fe foil, FeO, Fe2O3, Fe,W-N-C and Fe-N-C. **b**, Expanded pre-edge region of Fe K-edge XANES spectra.

**
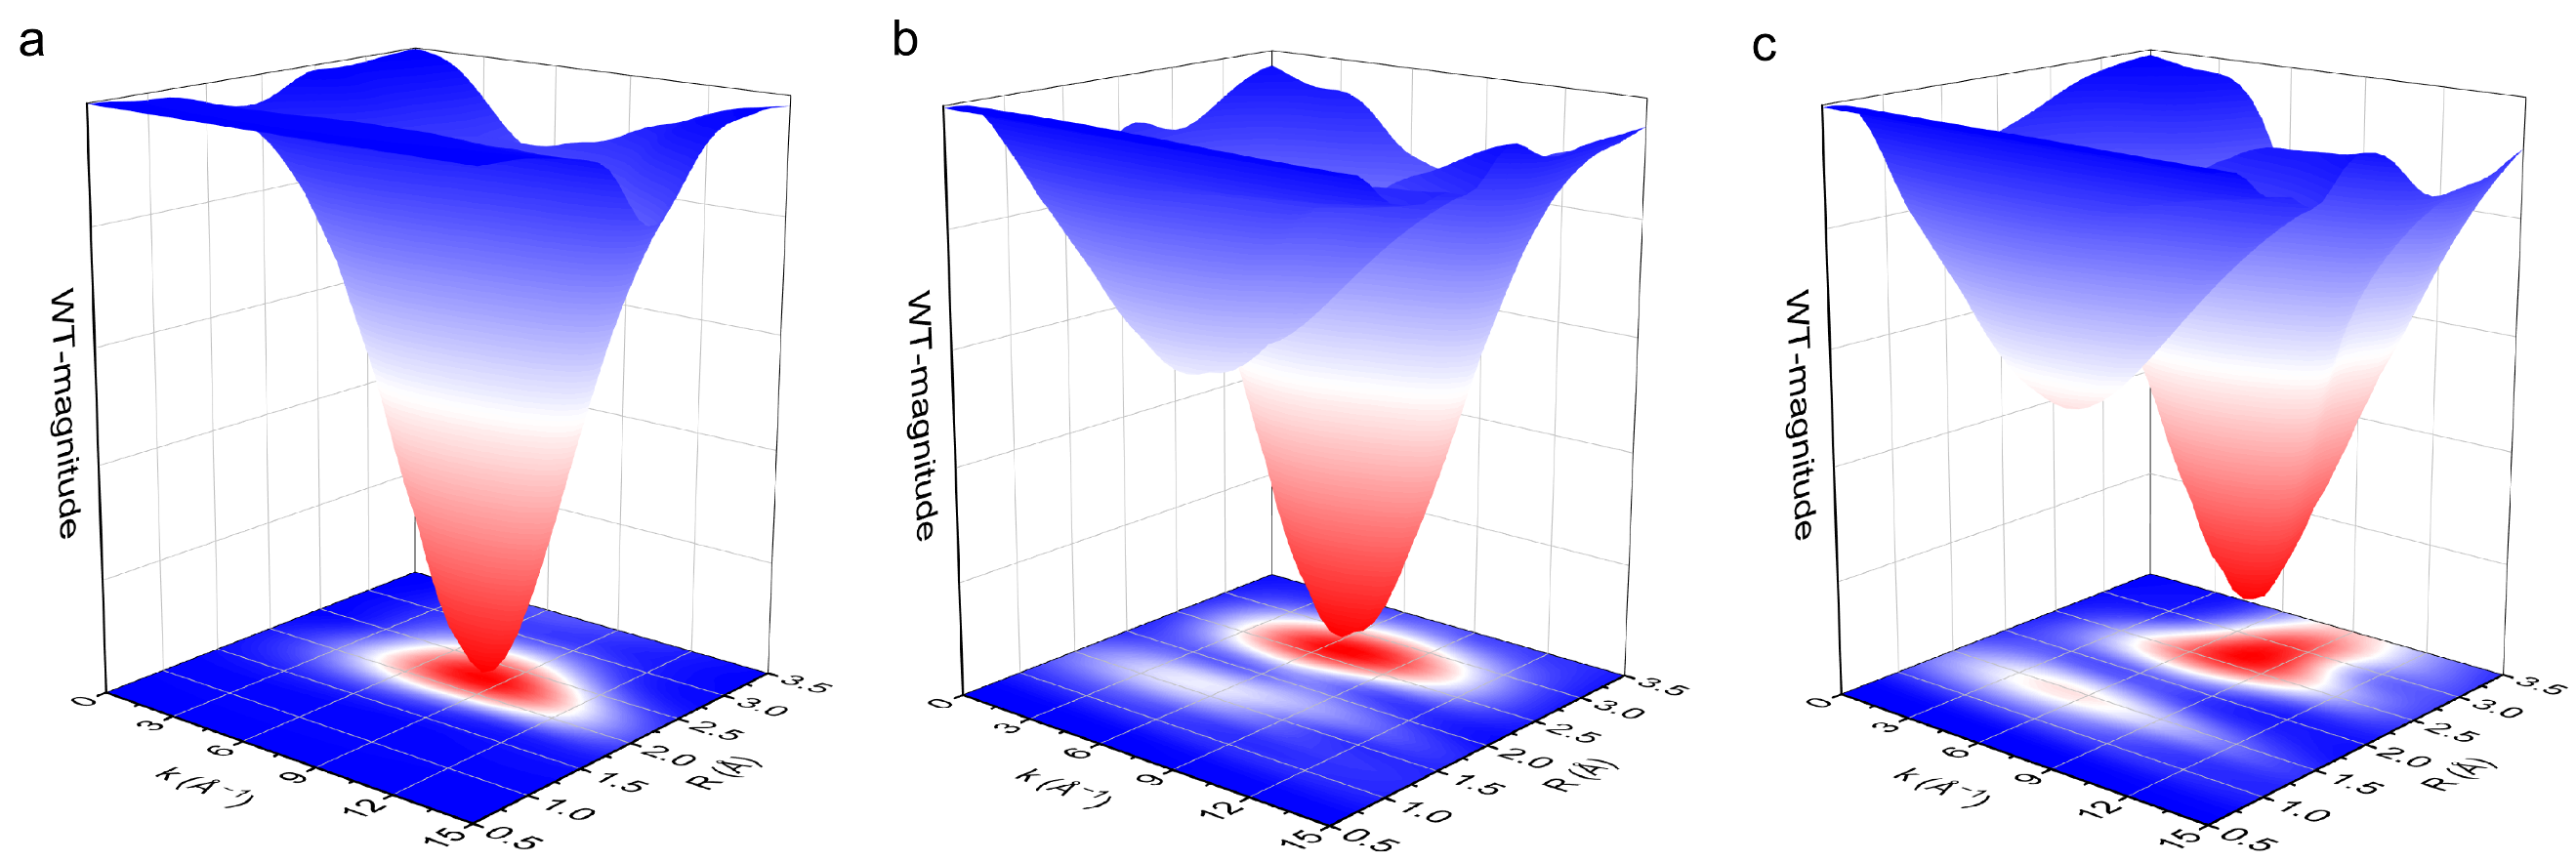
**

**Supplementary Fig. 12.** 3D contour wavelet transformed extended X-ray absorption fine structure (EXAFS) maps of Fe foil (**a**), FeO (**b**) and Fe2O3 (**c**).

**
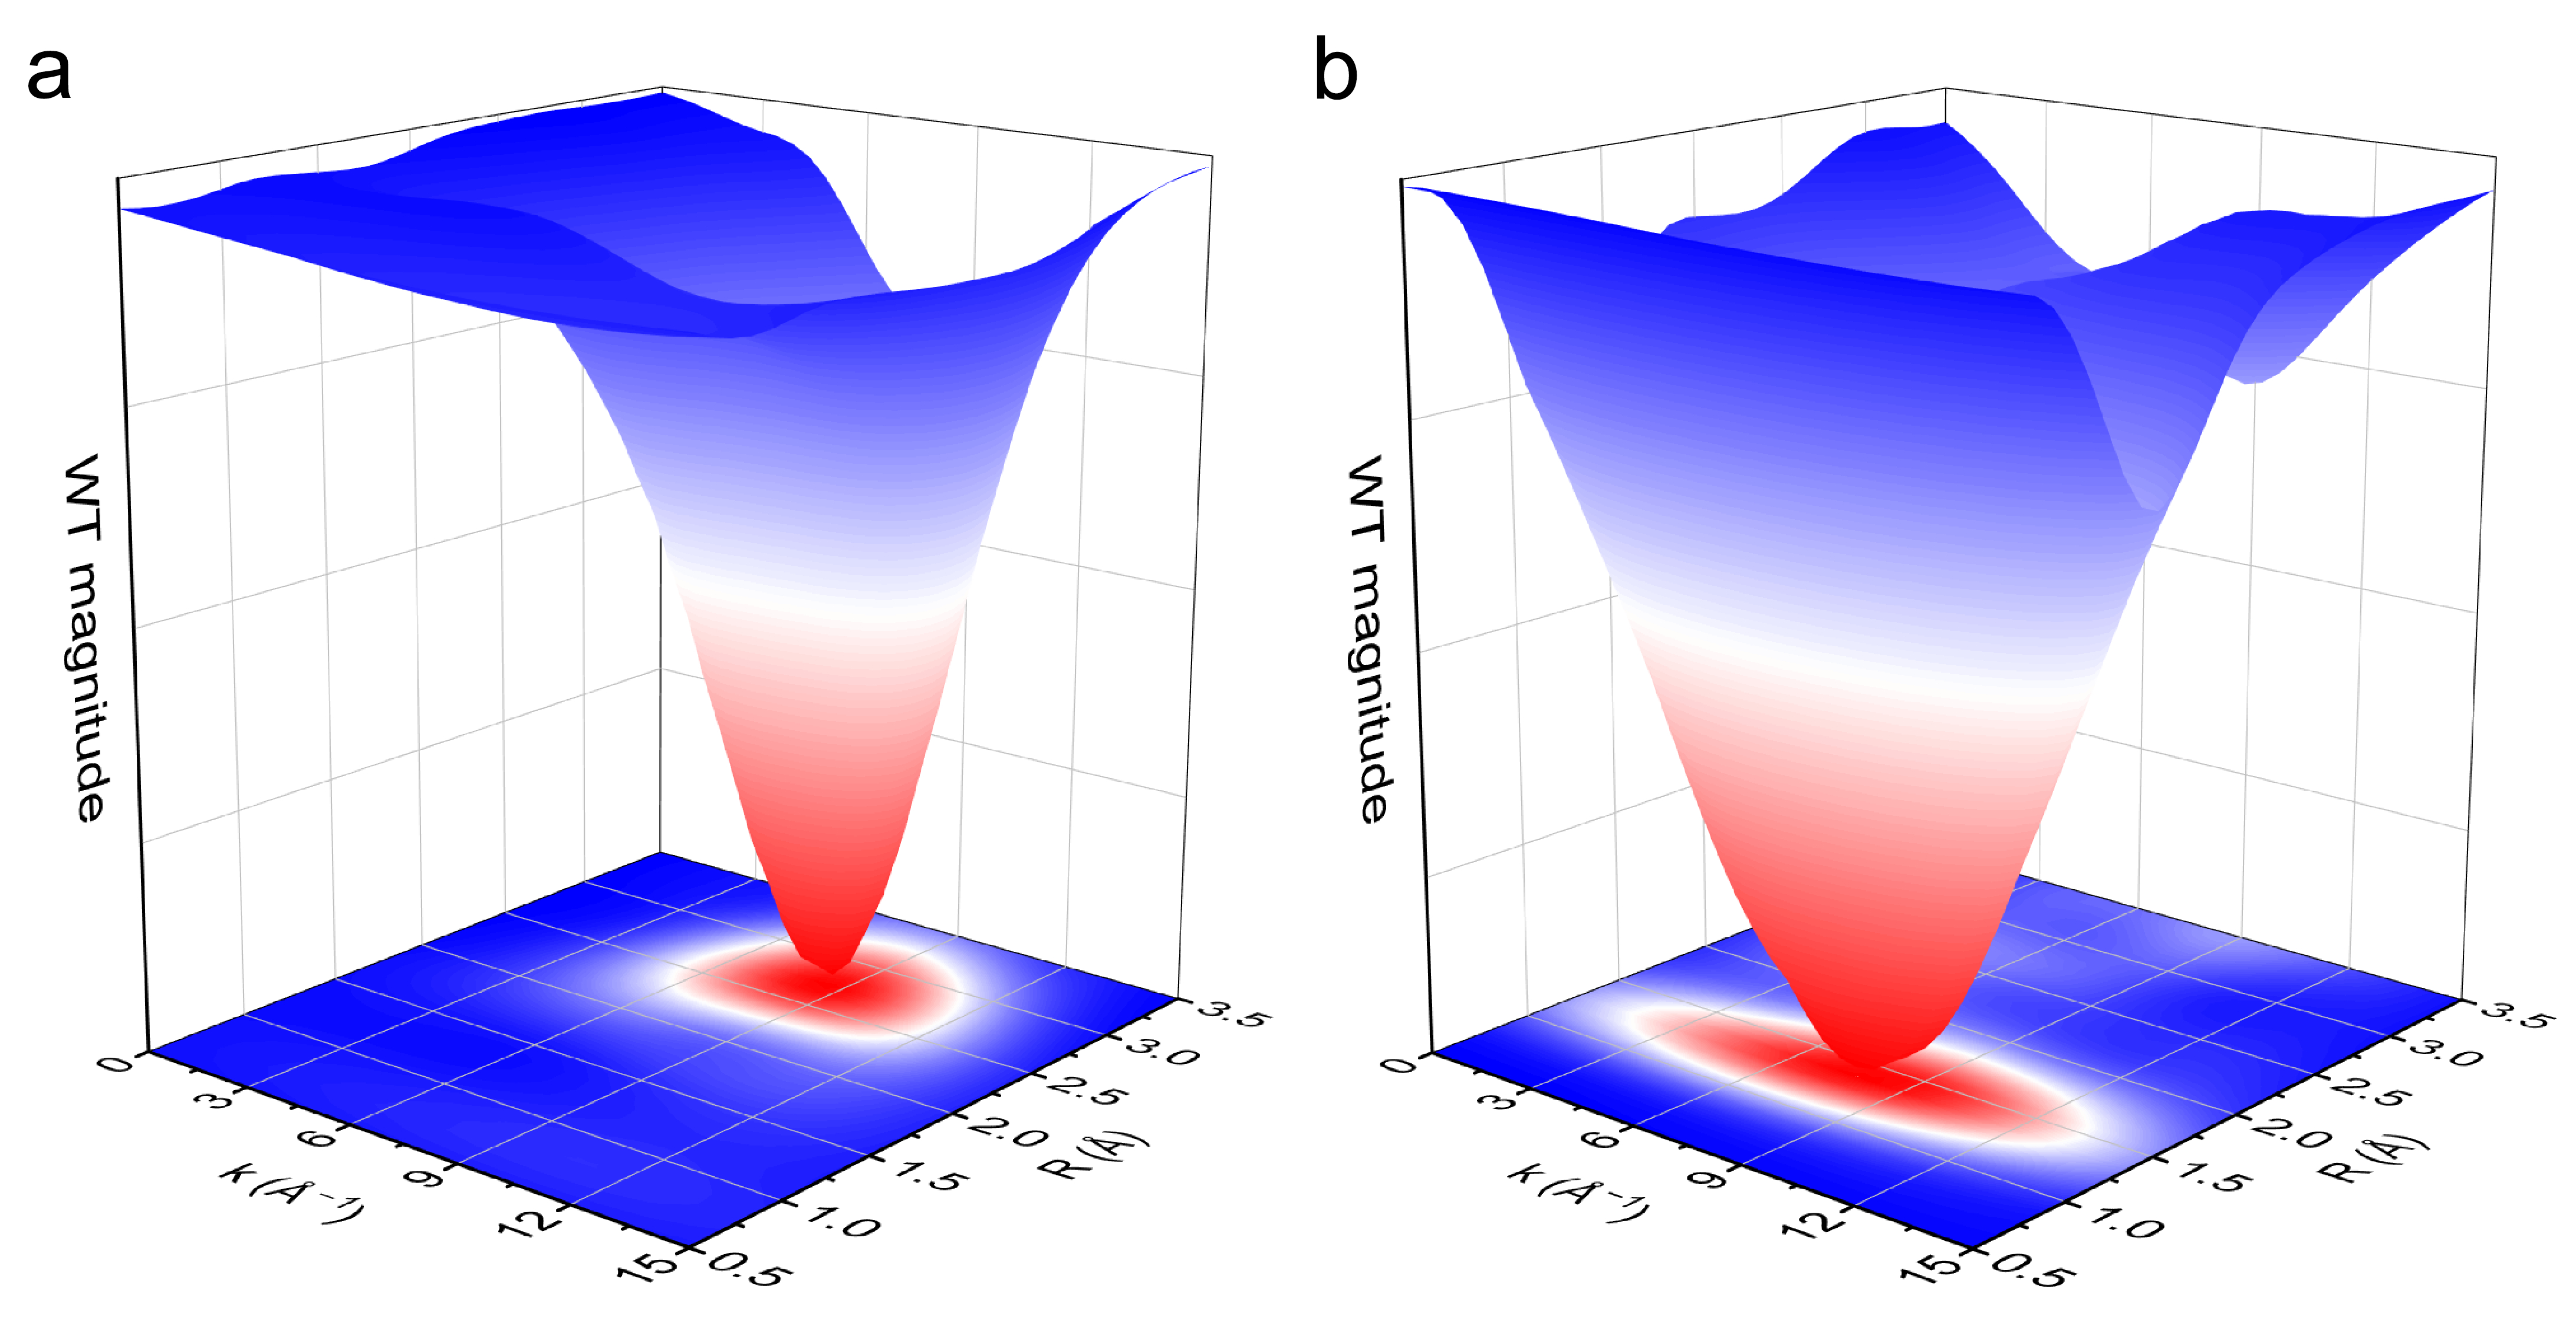
**

**Supplementary Fig. 13.** 3D contour Wavelet transformed EXAFS maps of W powder (**a**) and WO3 (**b**).

**
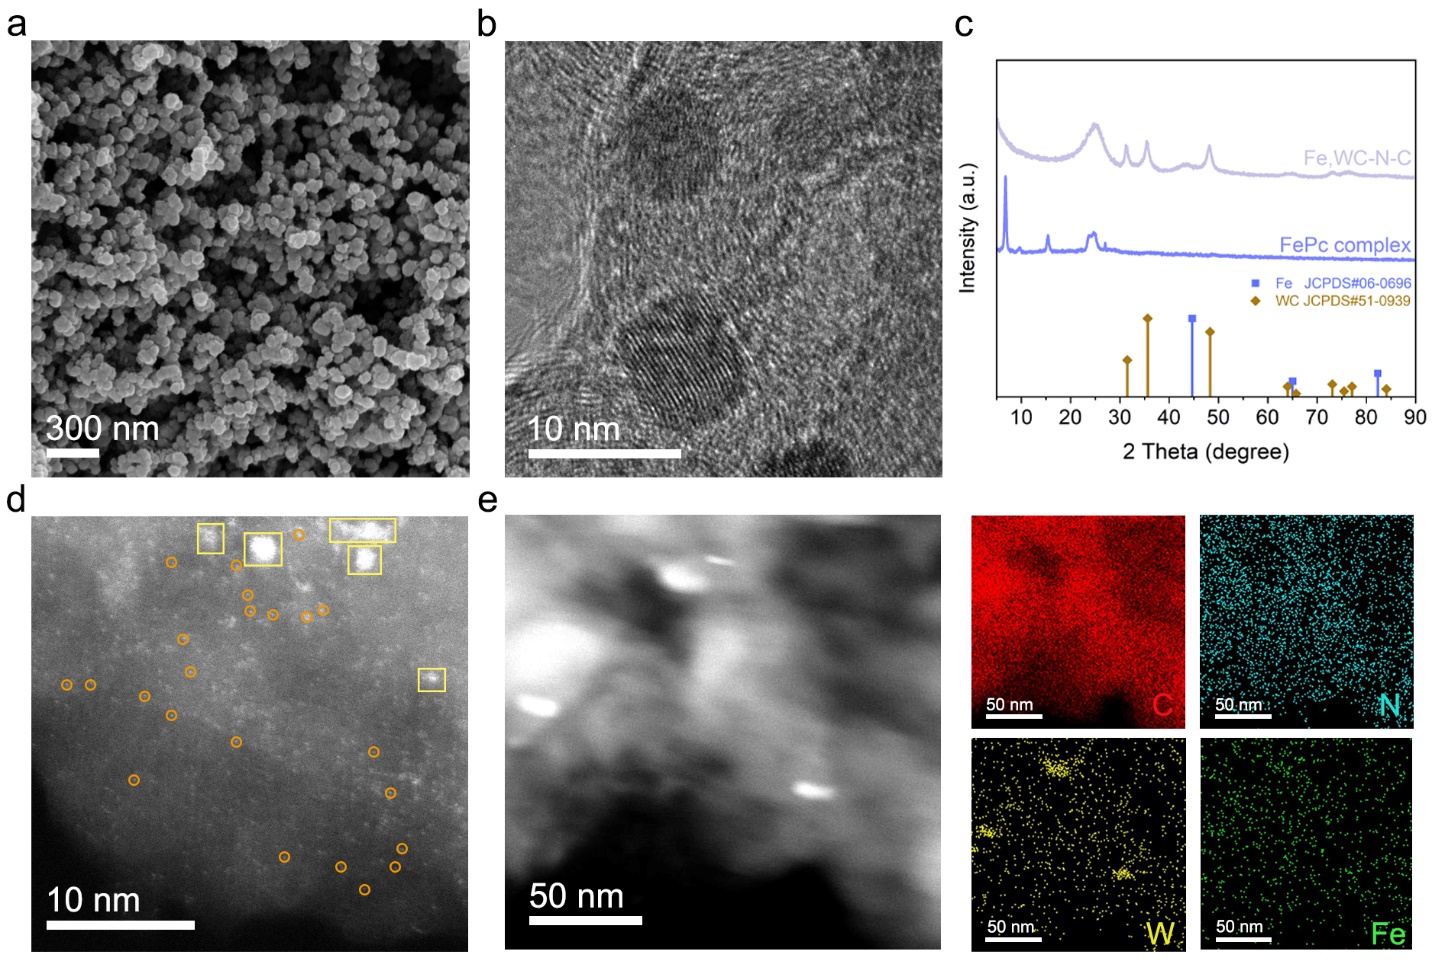
**

**Supplementary Fig. 14.** Morphological characterizations of Fe,WC-N-C catalyst. **a**, SEM image. **b**, TEM image. **c**, XRD patterns of Fe,WC-N-C catalyst and FePc complex. **d**, Aberration-corrected HAADF-STEM image. **e**, HAADF-STEM image and corresponding EDX mapping images for C (red), N (blue), W (yellow) and Fe (green).

**
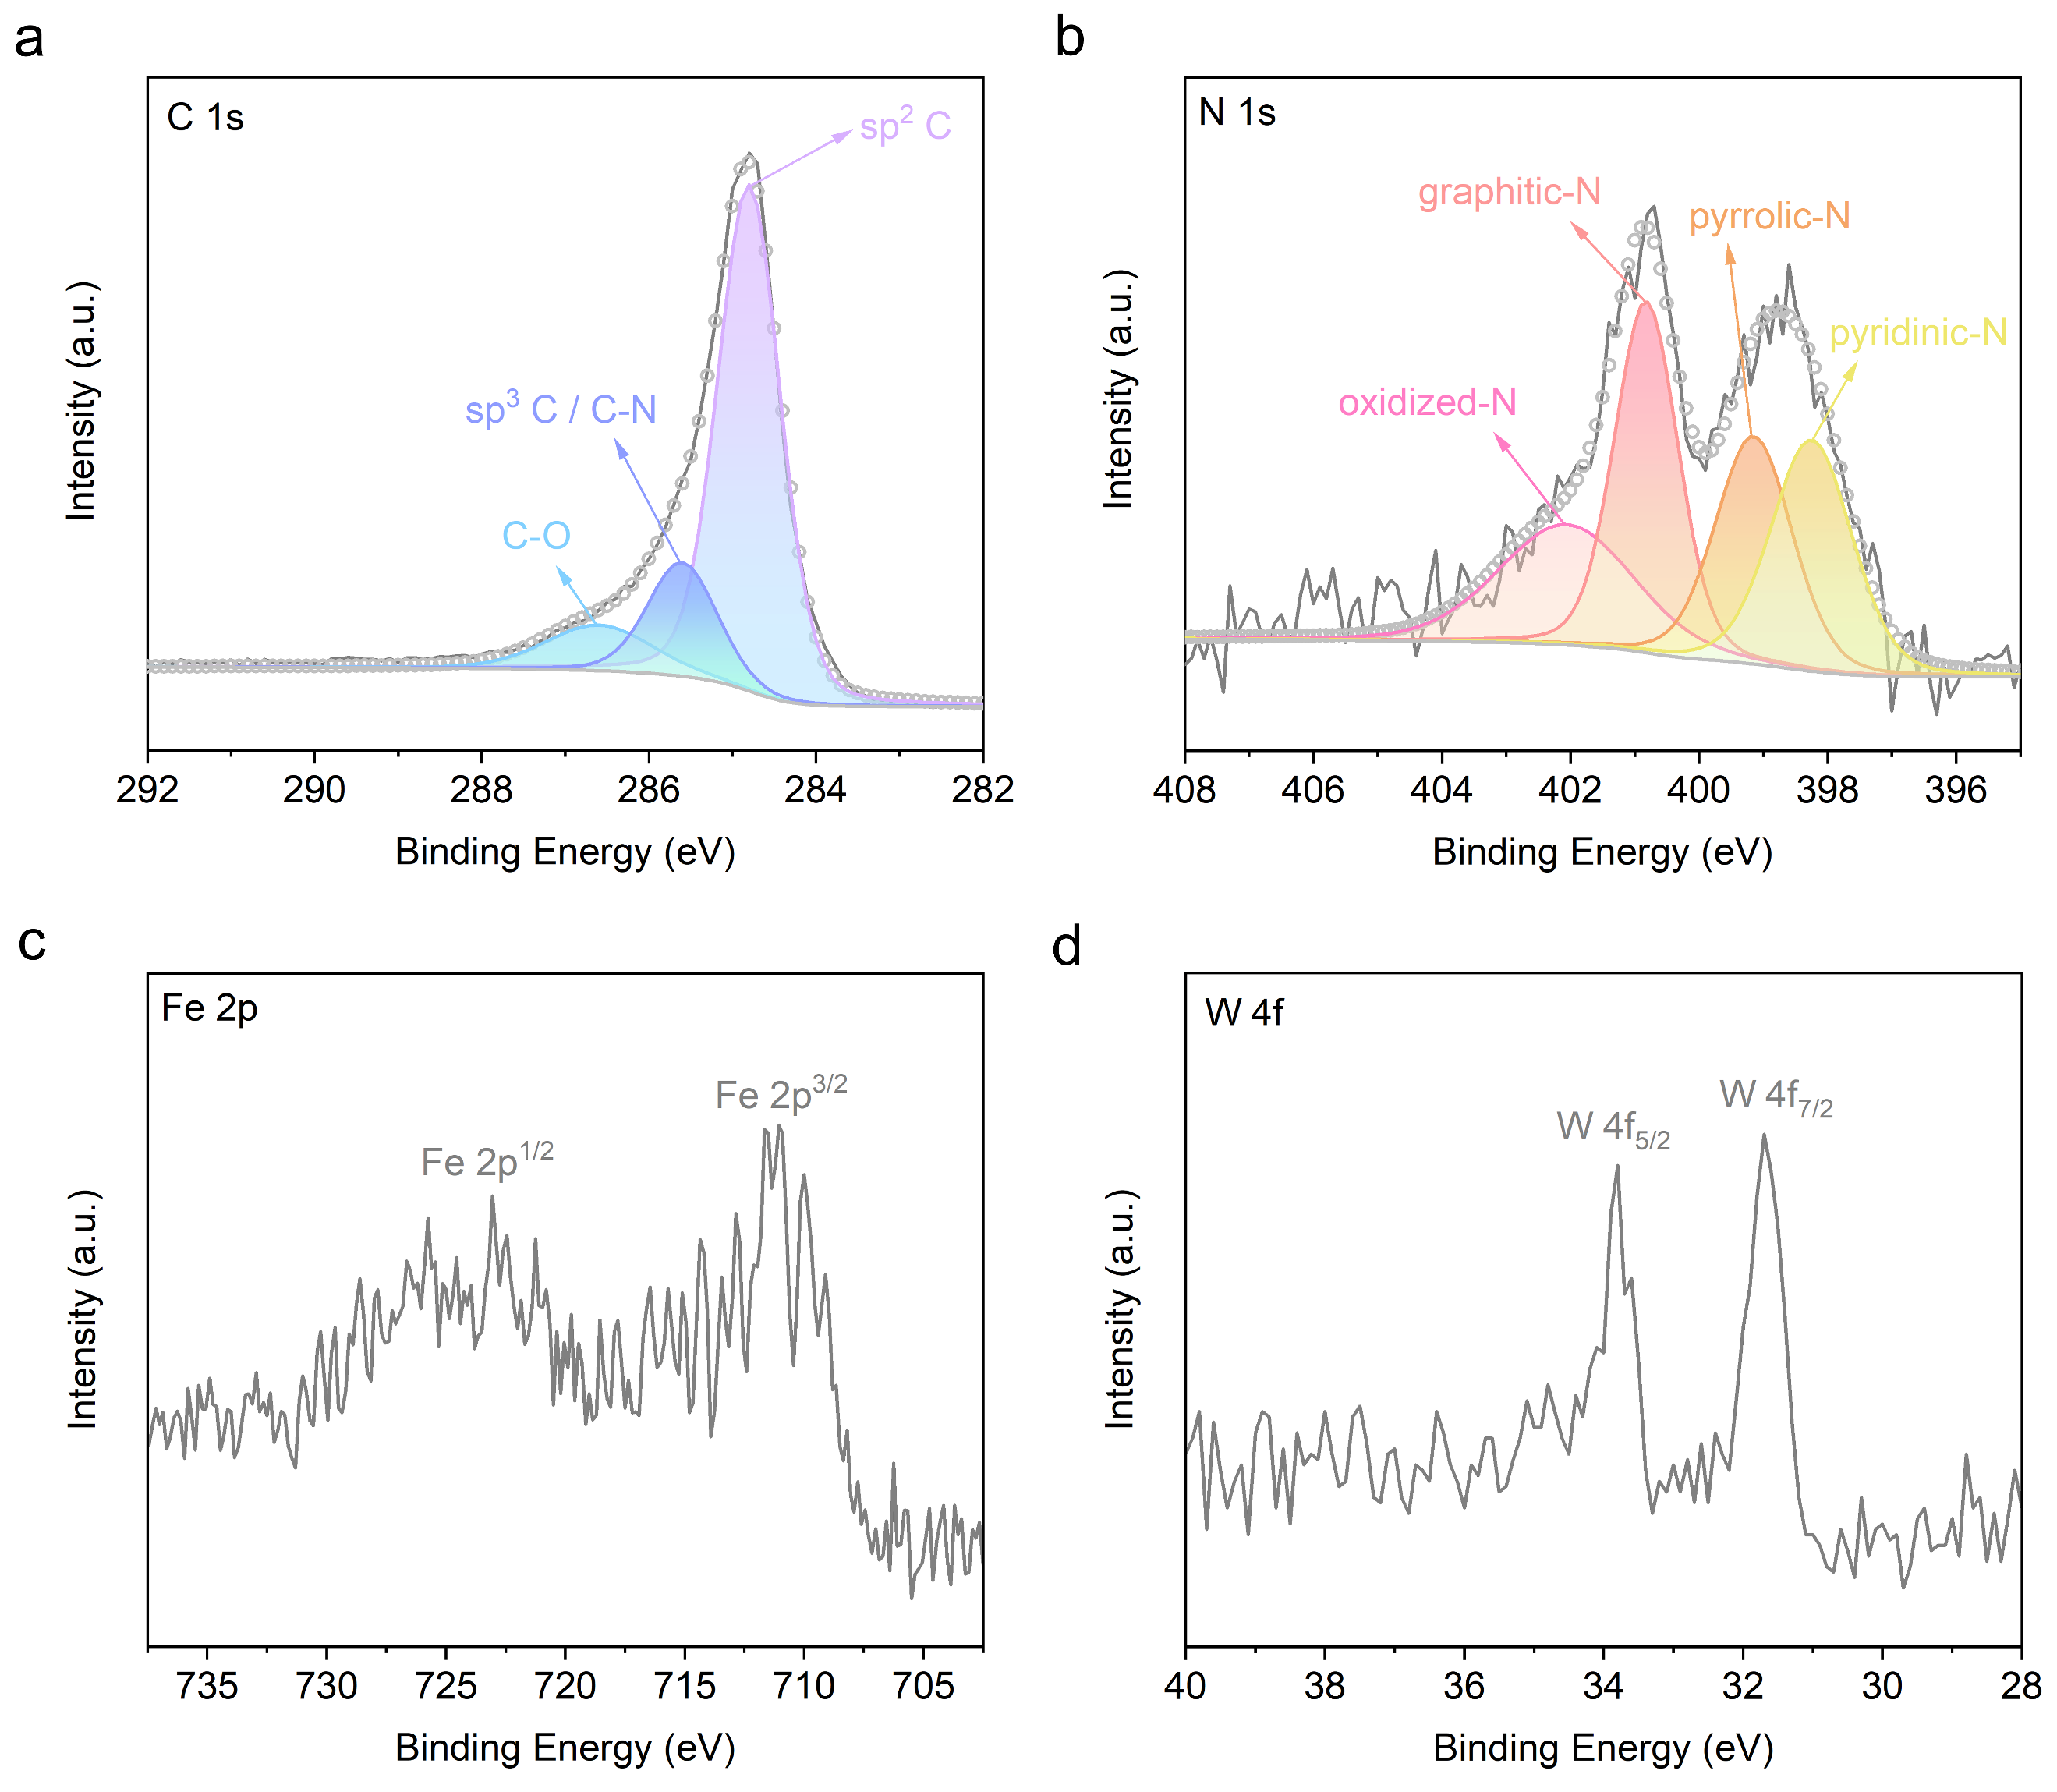
**

**Supplementary Fig. 15.** XPS analysis of Fe,WC-N-C. **a**, High-resolution XPS spectrum of C 1s. **b**, High-resolution XPS spectrum of N 1s. **c**, High-resolution XPS spectrum of Fe 2p. **d**, High-resolution XPS spectrum of W 4f.


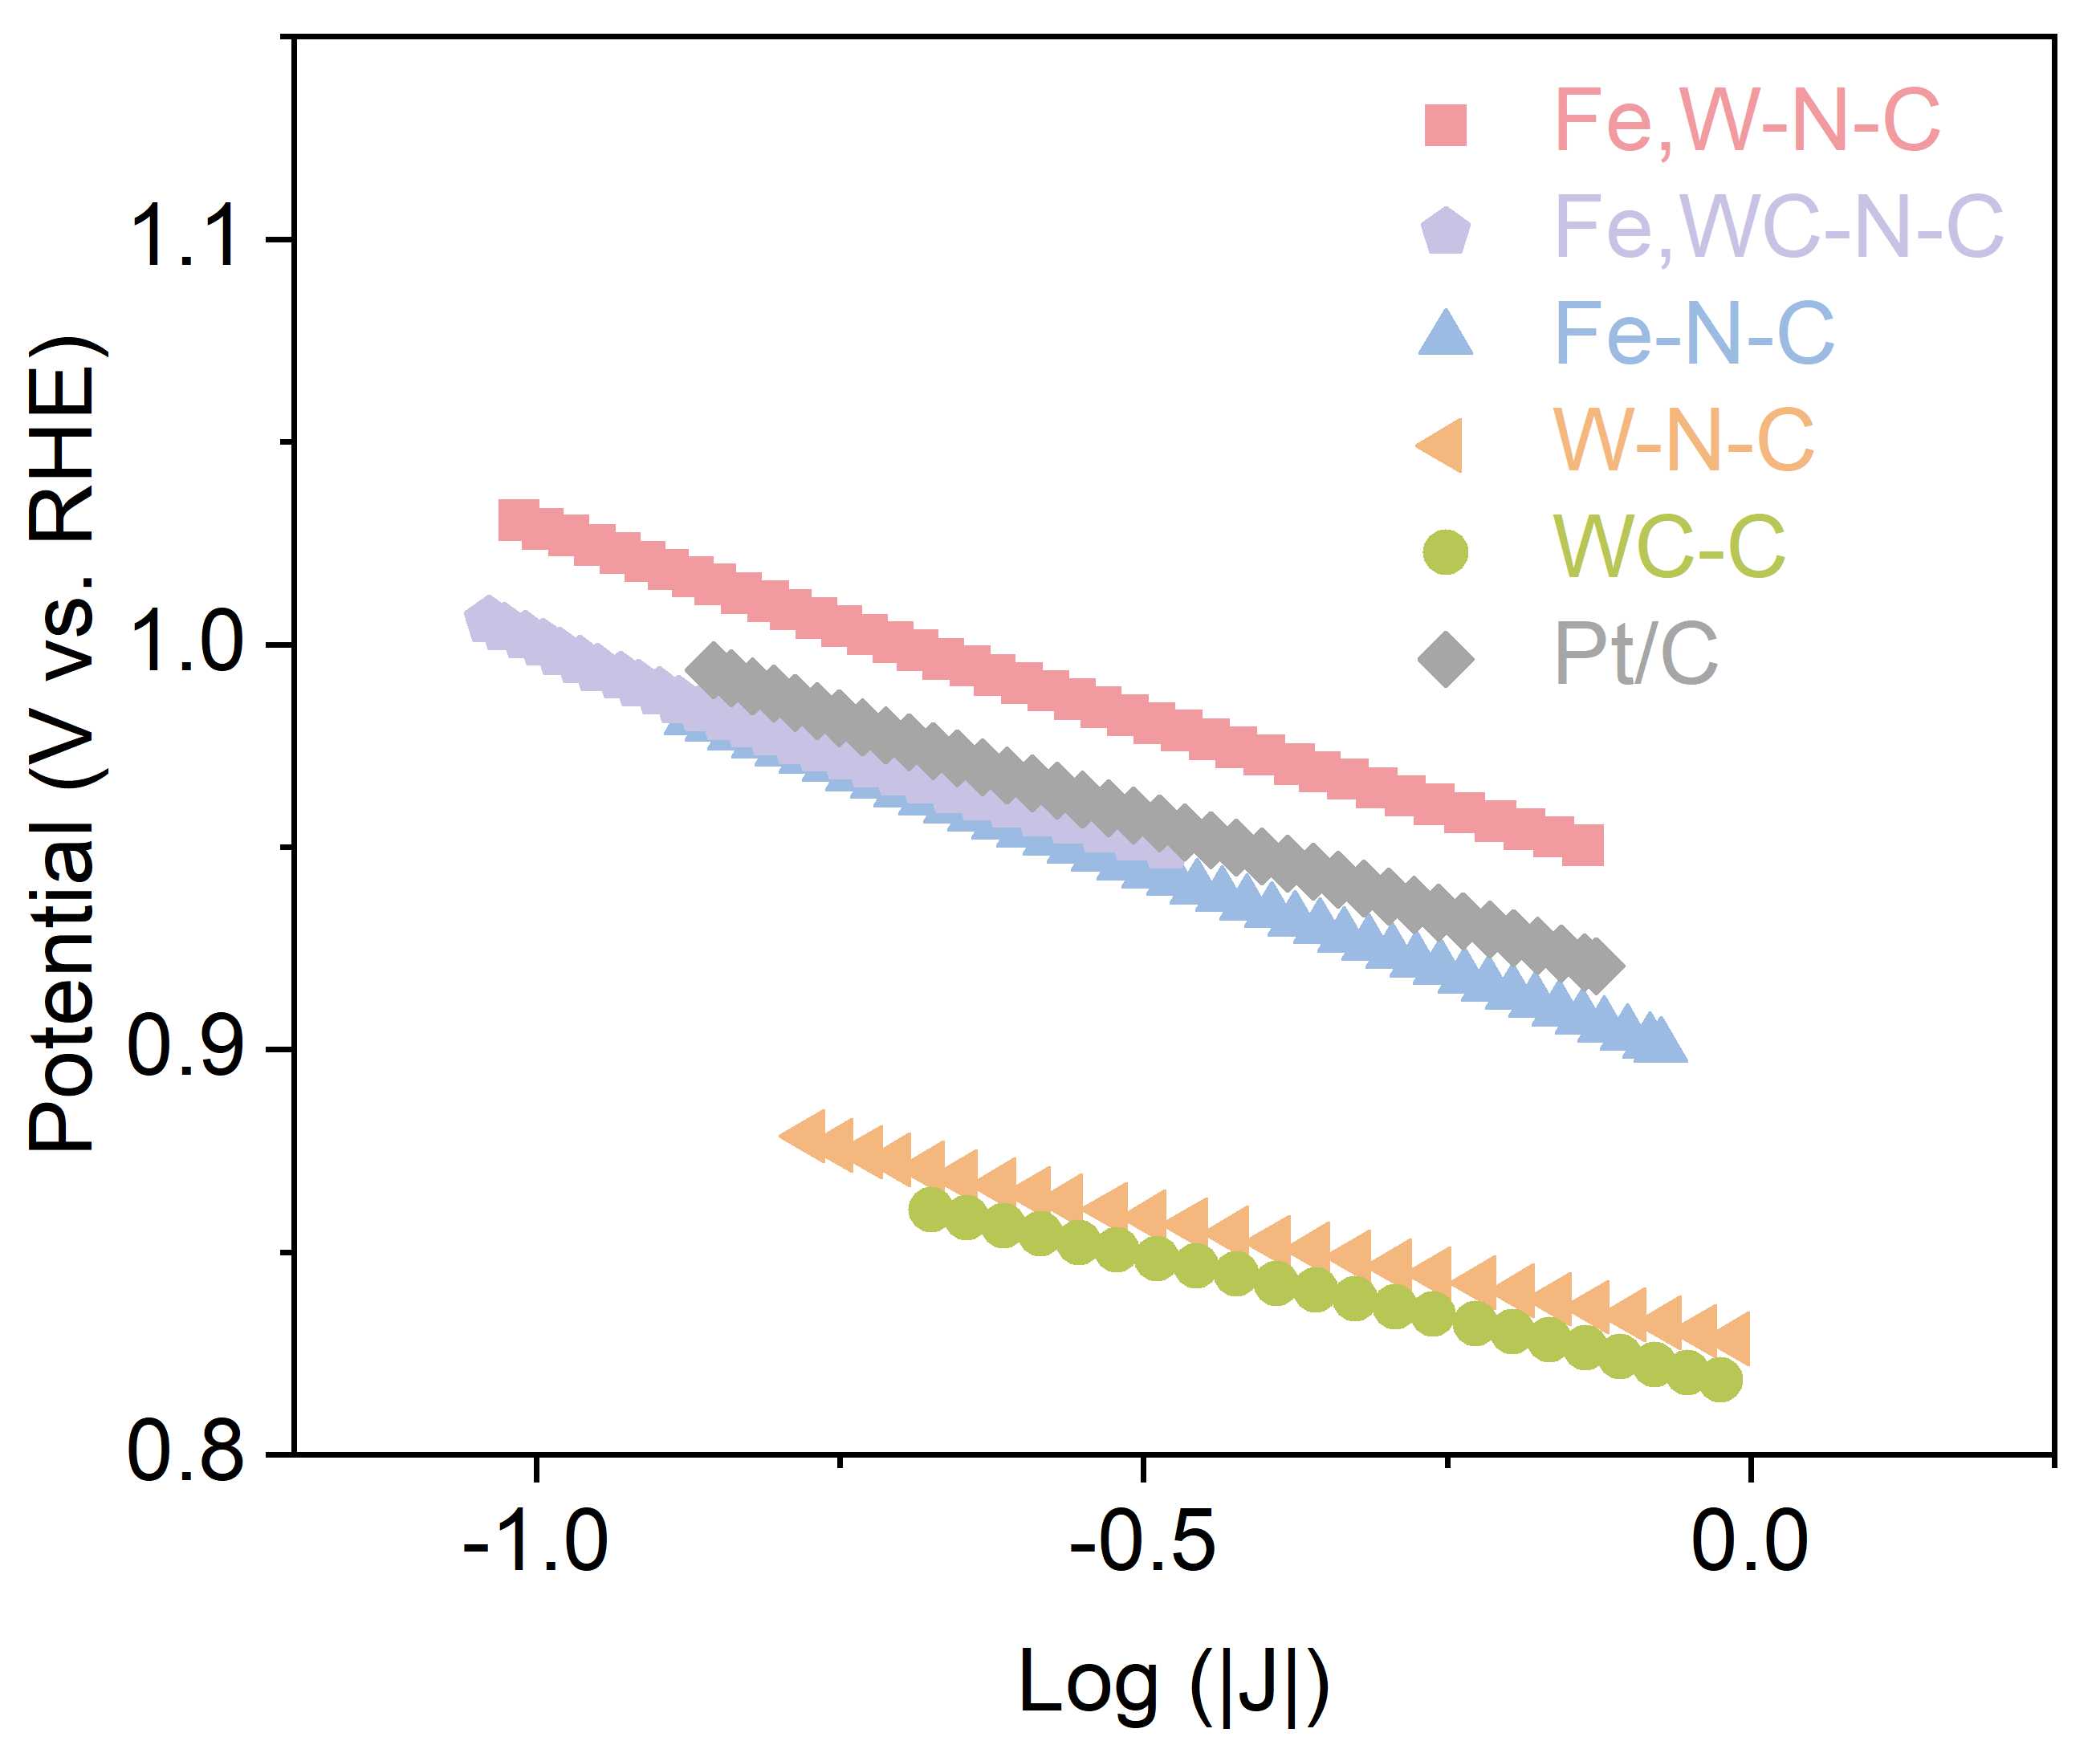


**Supplementary Fig. 16.** Tafel slope for oxygen reduction reaction (ORR) of Fe,W-N-C, Fe,WC-N-C, Fe-N-C, W-N-C, WC-C and commercial 20 wt% Pt/C catalysts.

**
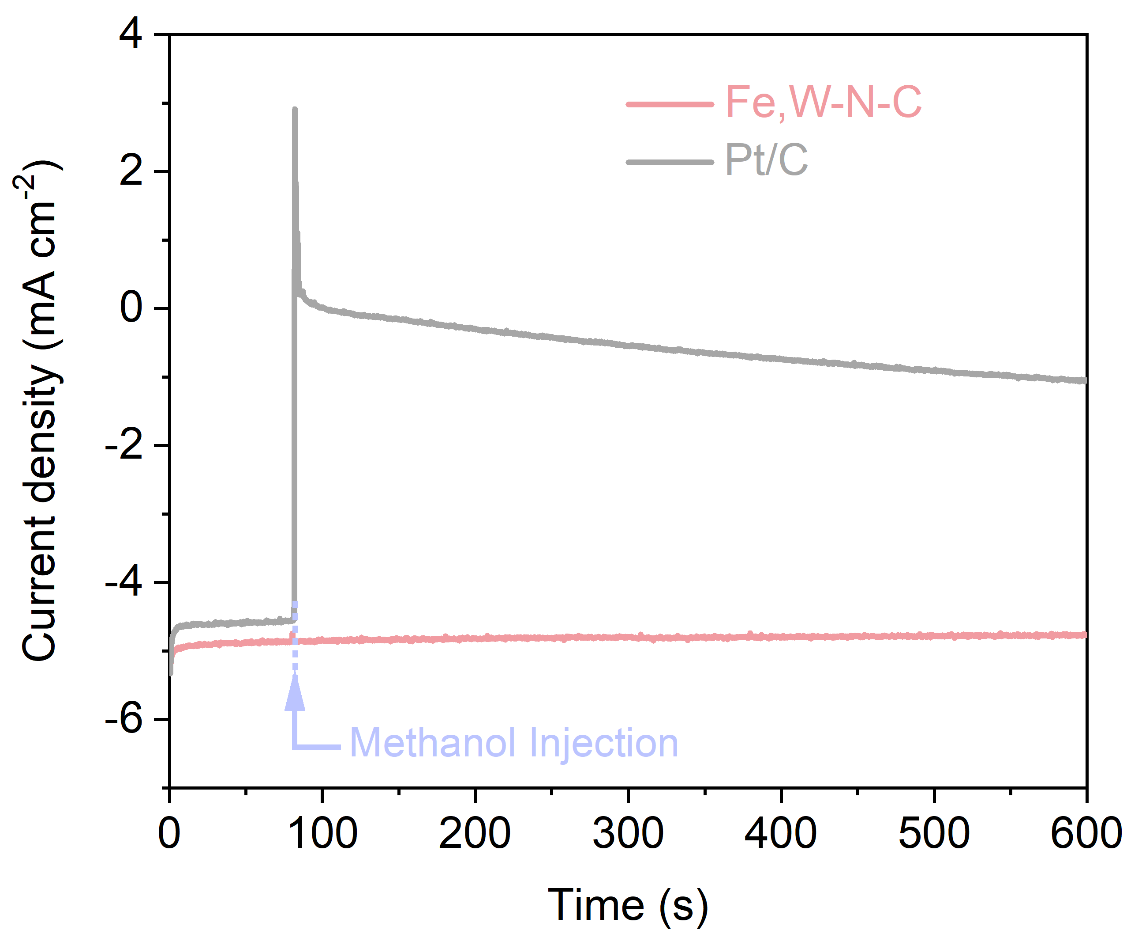
**

**Supplementary Fig. 17.** Methanol tolerance tests of Fe,W-N-C and commercial Pt/C catalysts at 0.67 V (V versus RHE). The chronoamperometric responses of the two catalysts before and after adding CH3OH to the electrolyte.

**
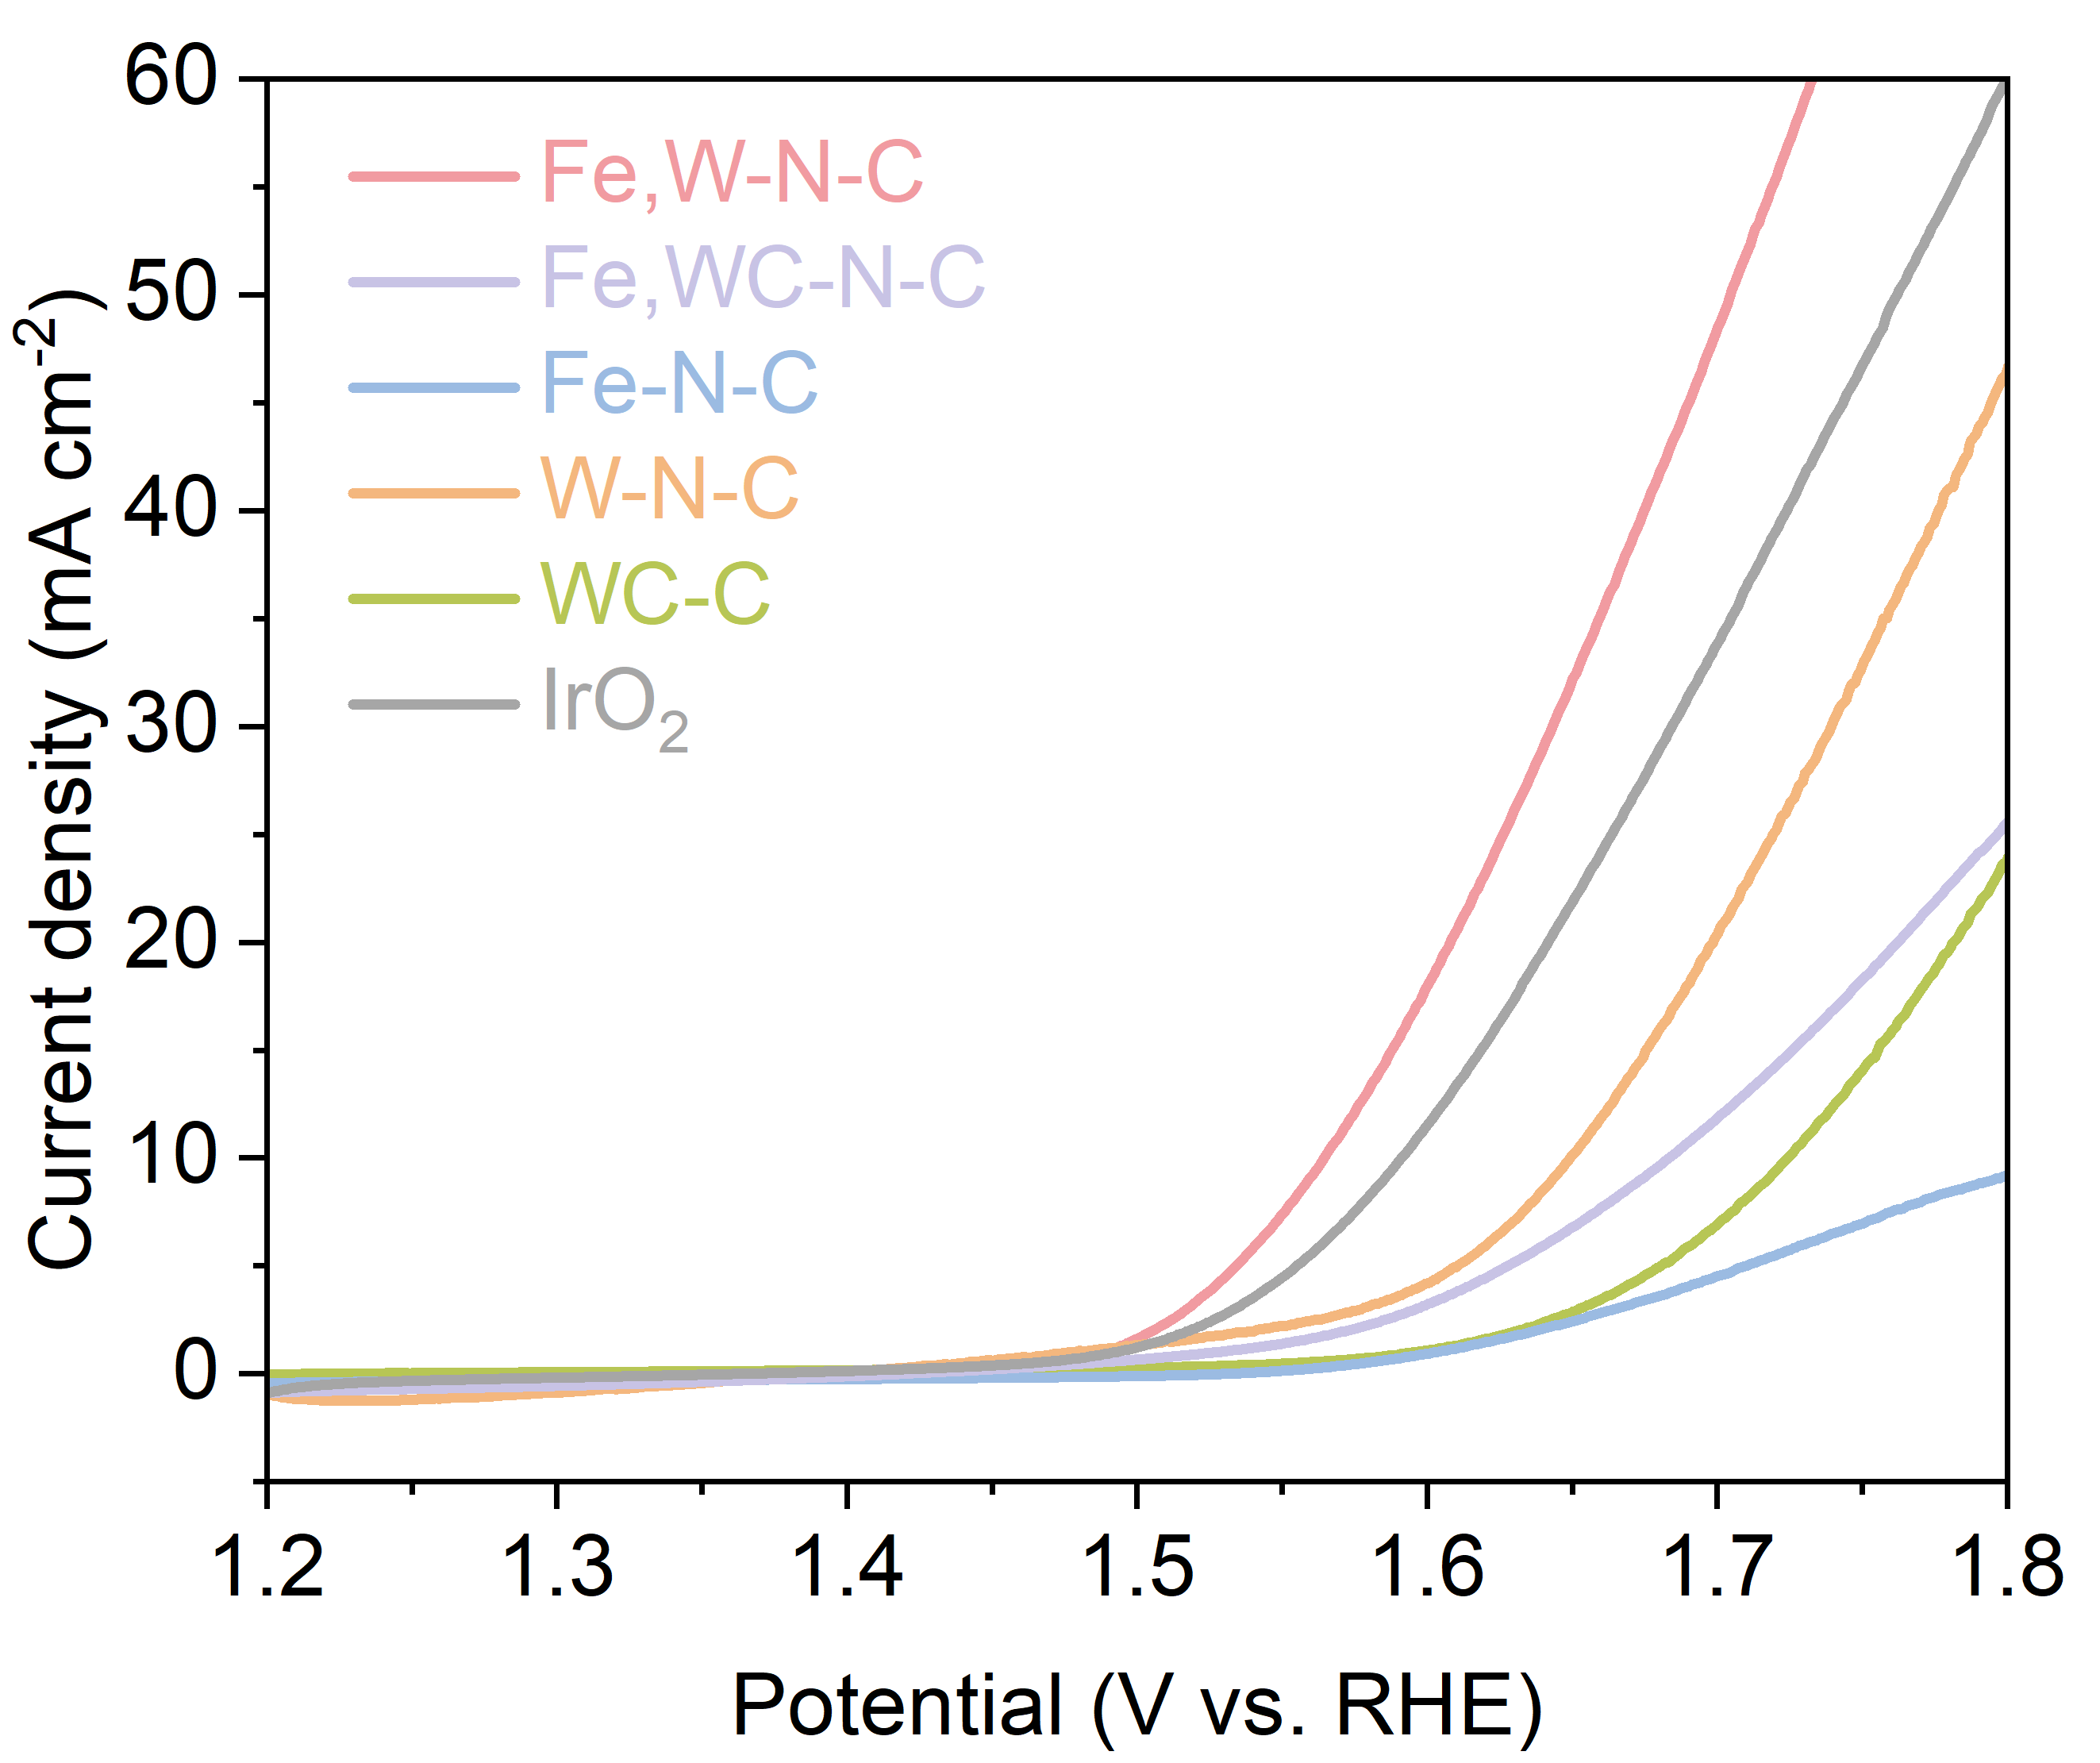
**

**Supplementary Fig. 18.** Oxygen evolution reaction (OER) polarization curves of Fe,W-N-C, Fe,WC-N-C, Fe-N-C, W-N-C, WC-C and commercial IrO2 catalysts in 1.0 M KOH solution.

**
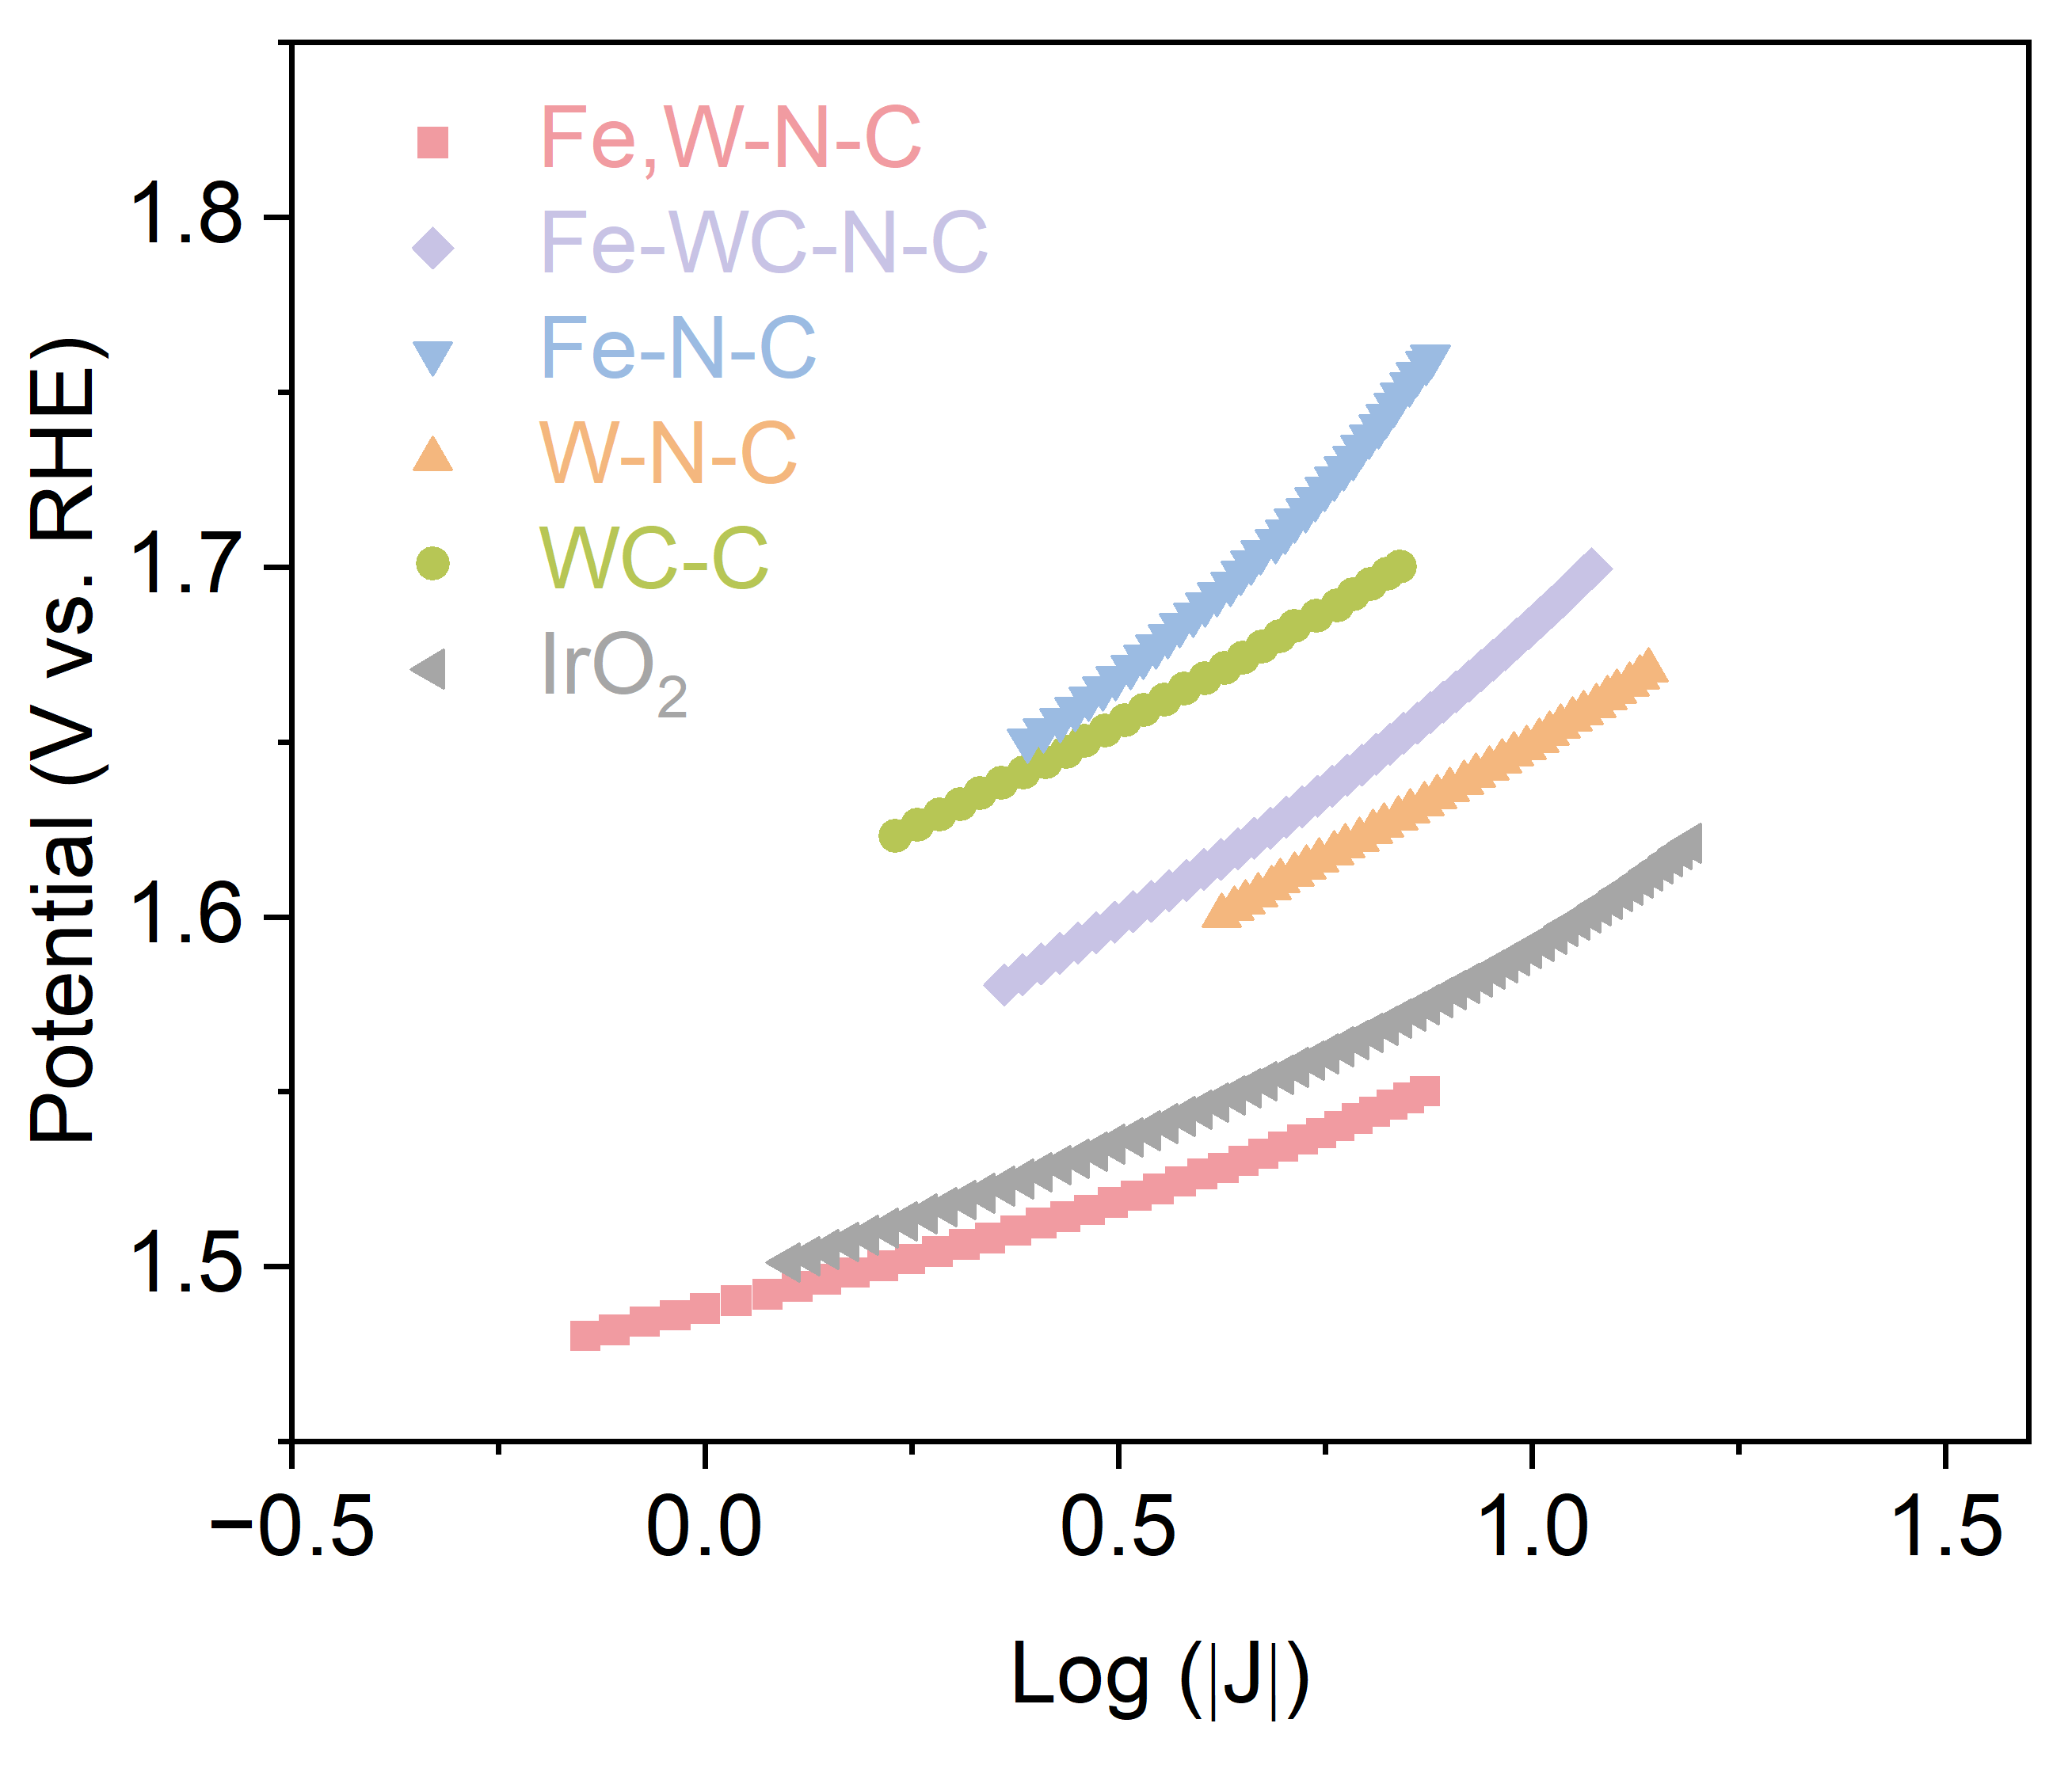
**

**Supplementary Fig. 19.** OER Tafel slopes of Fe,W-N-C, Fe,WC-N-C, Fe-N-C, W-N-C, WC-C and commercial IrO2 catalysts.

**
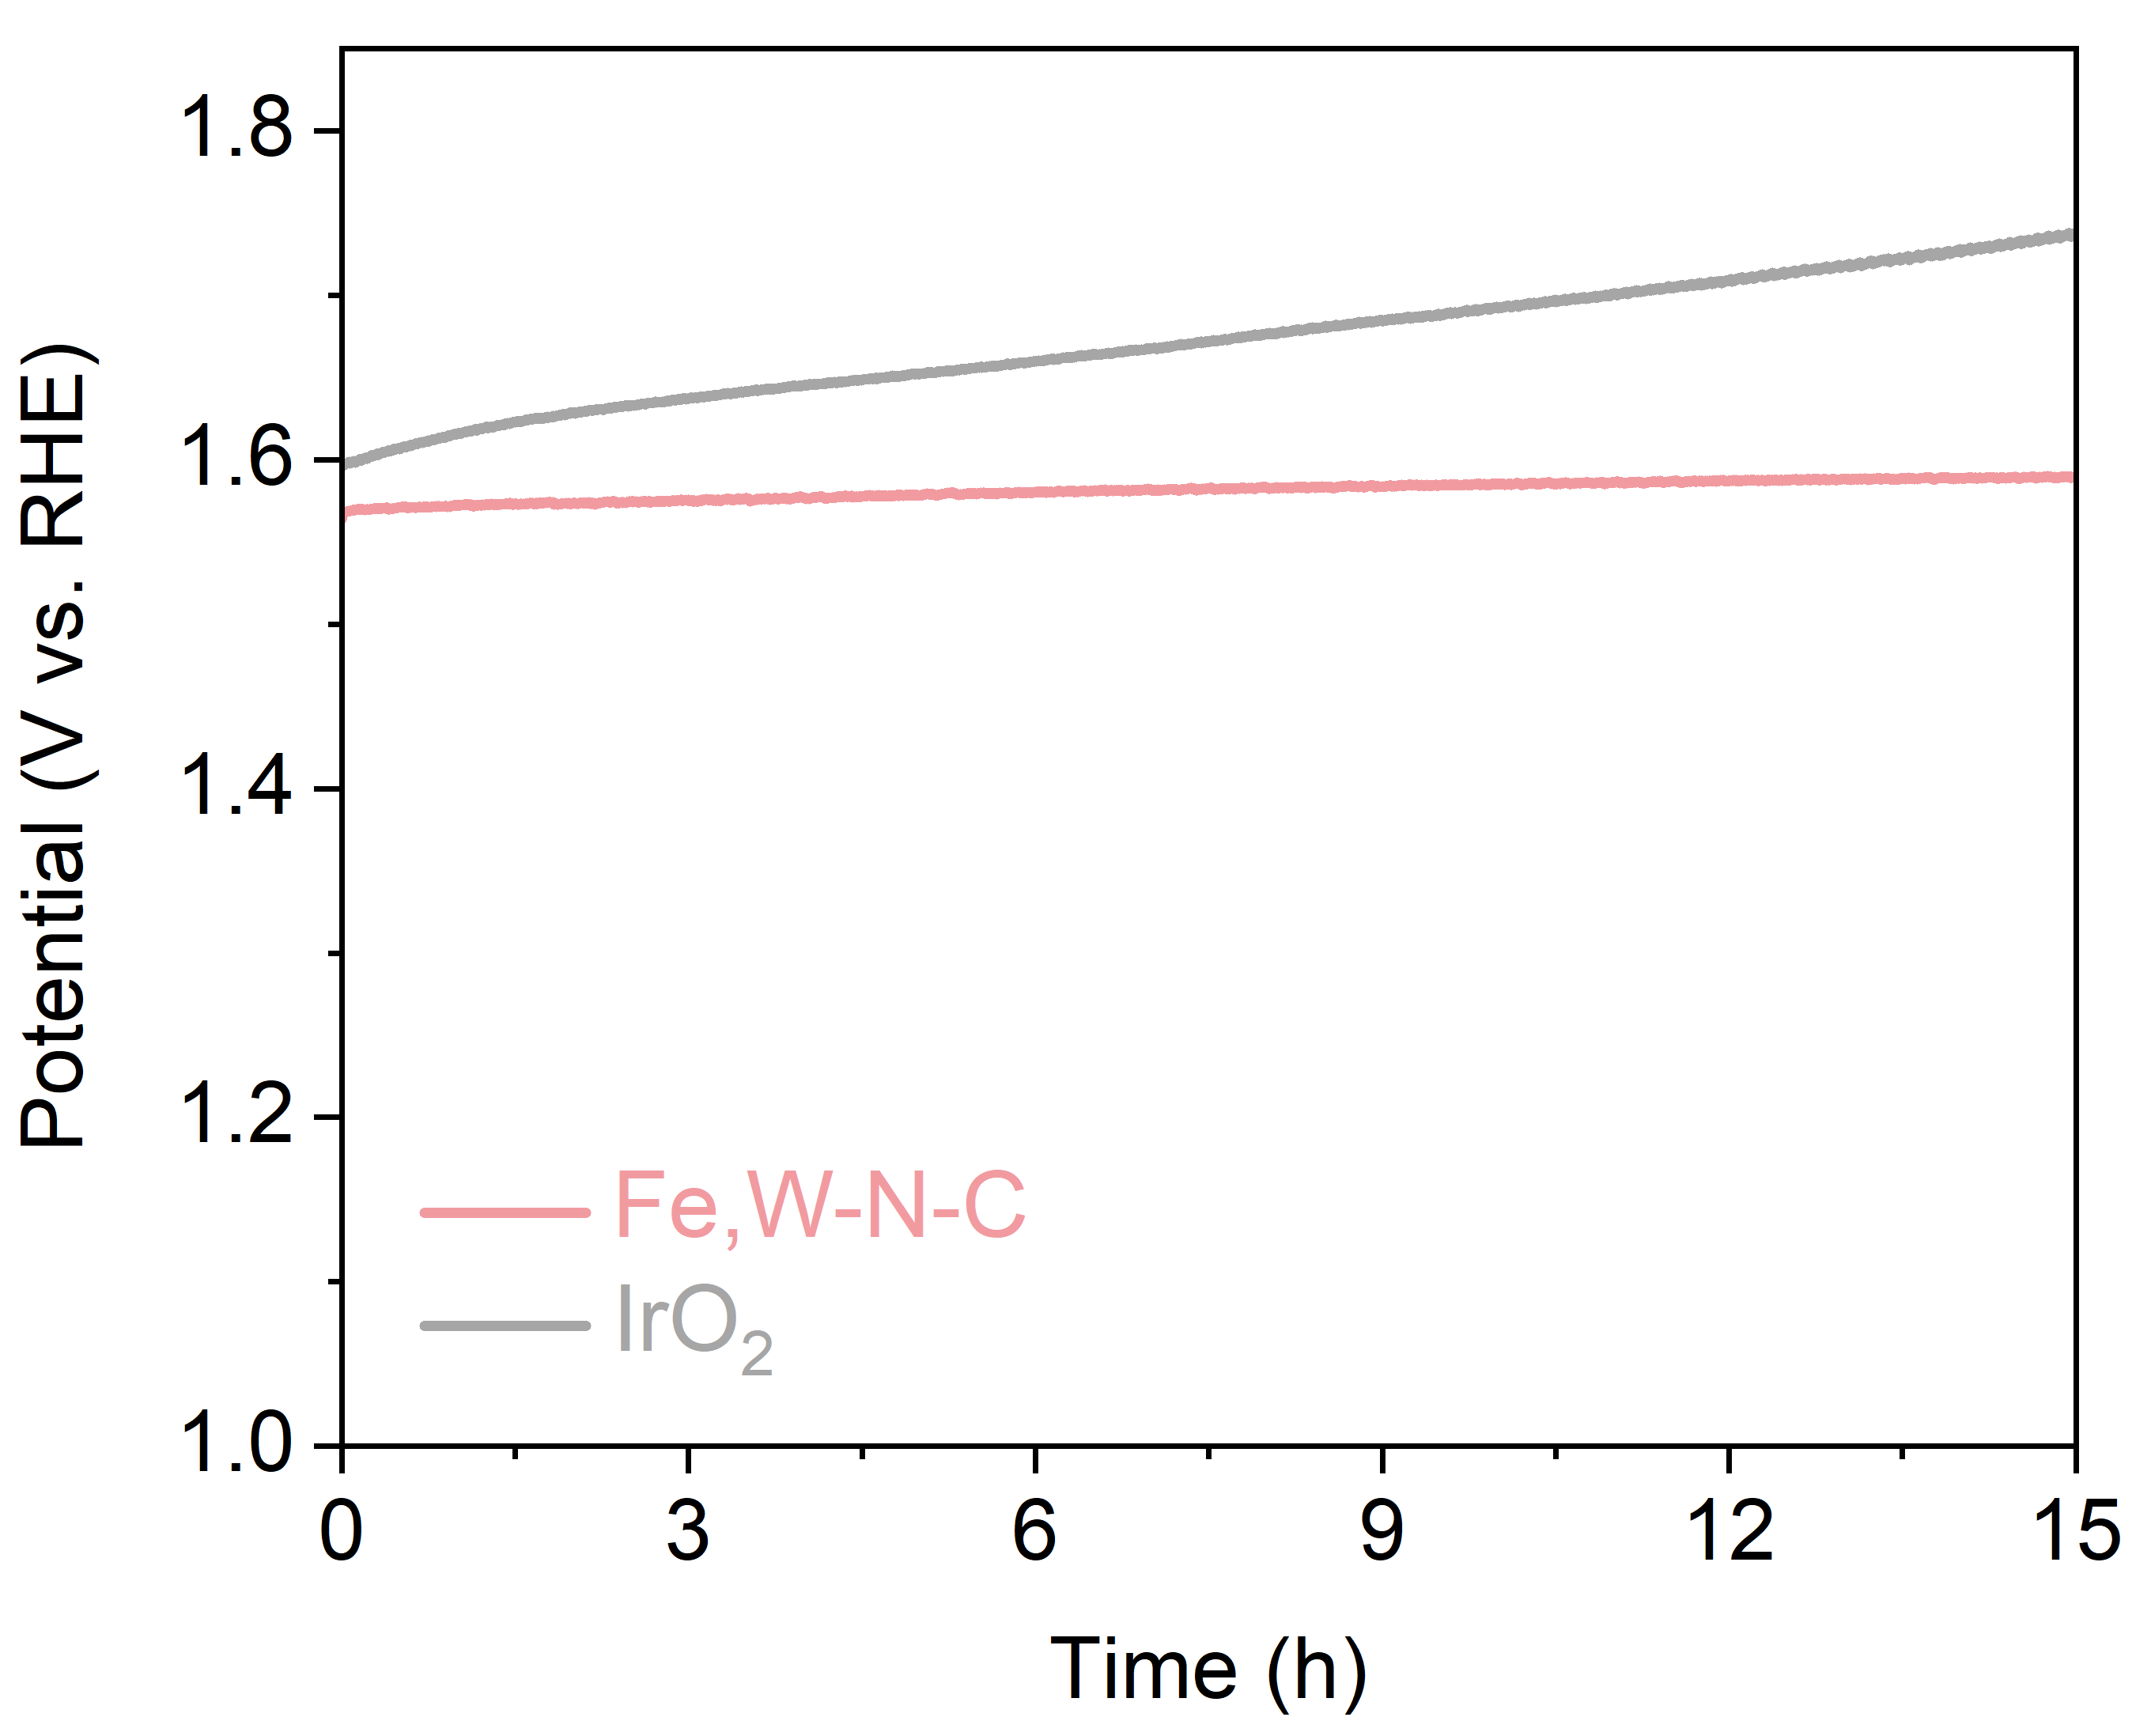
**

**Supplementary Fig. 20.** Long-term electrochemical OER stability tests of Fe,W-N-C and commercial IrO2 catalysts.


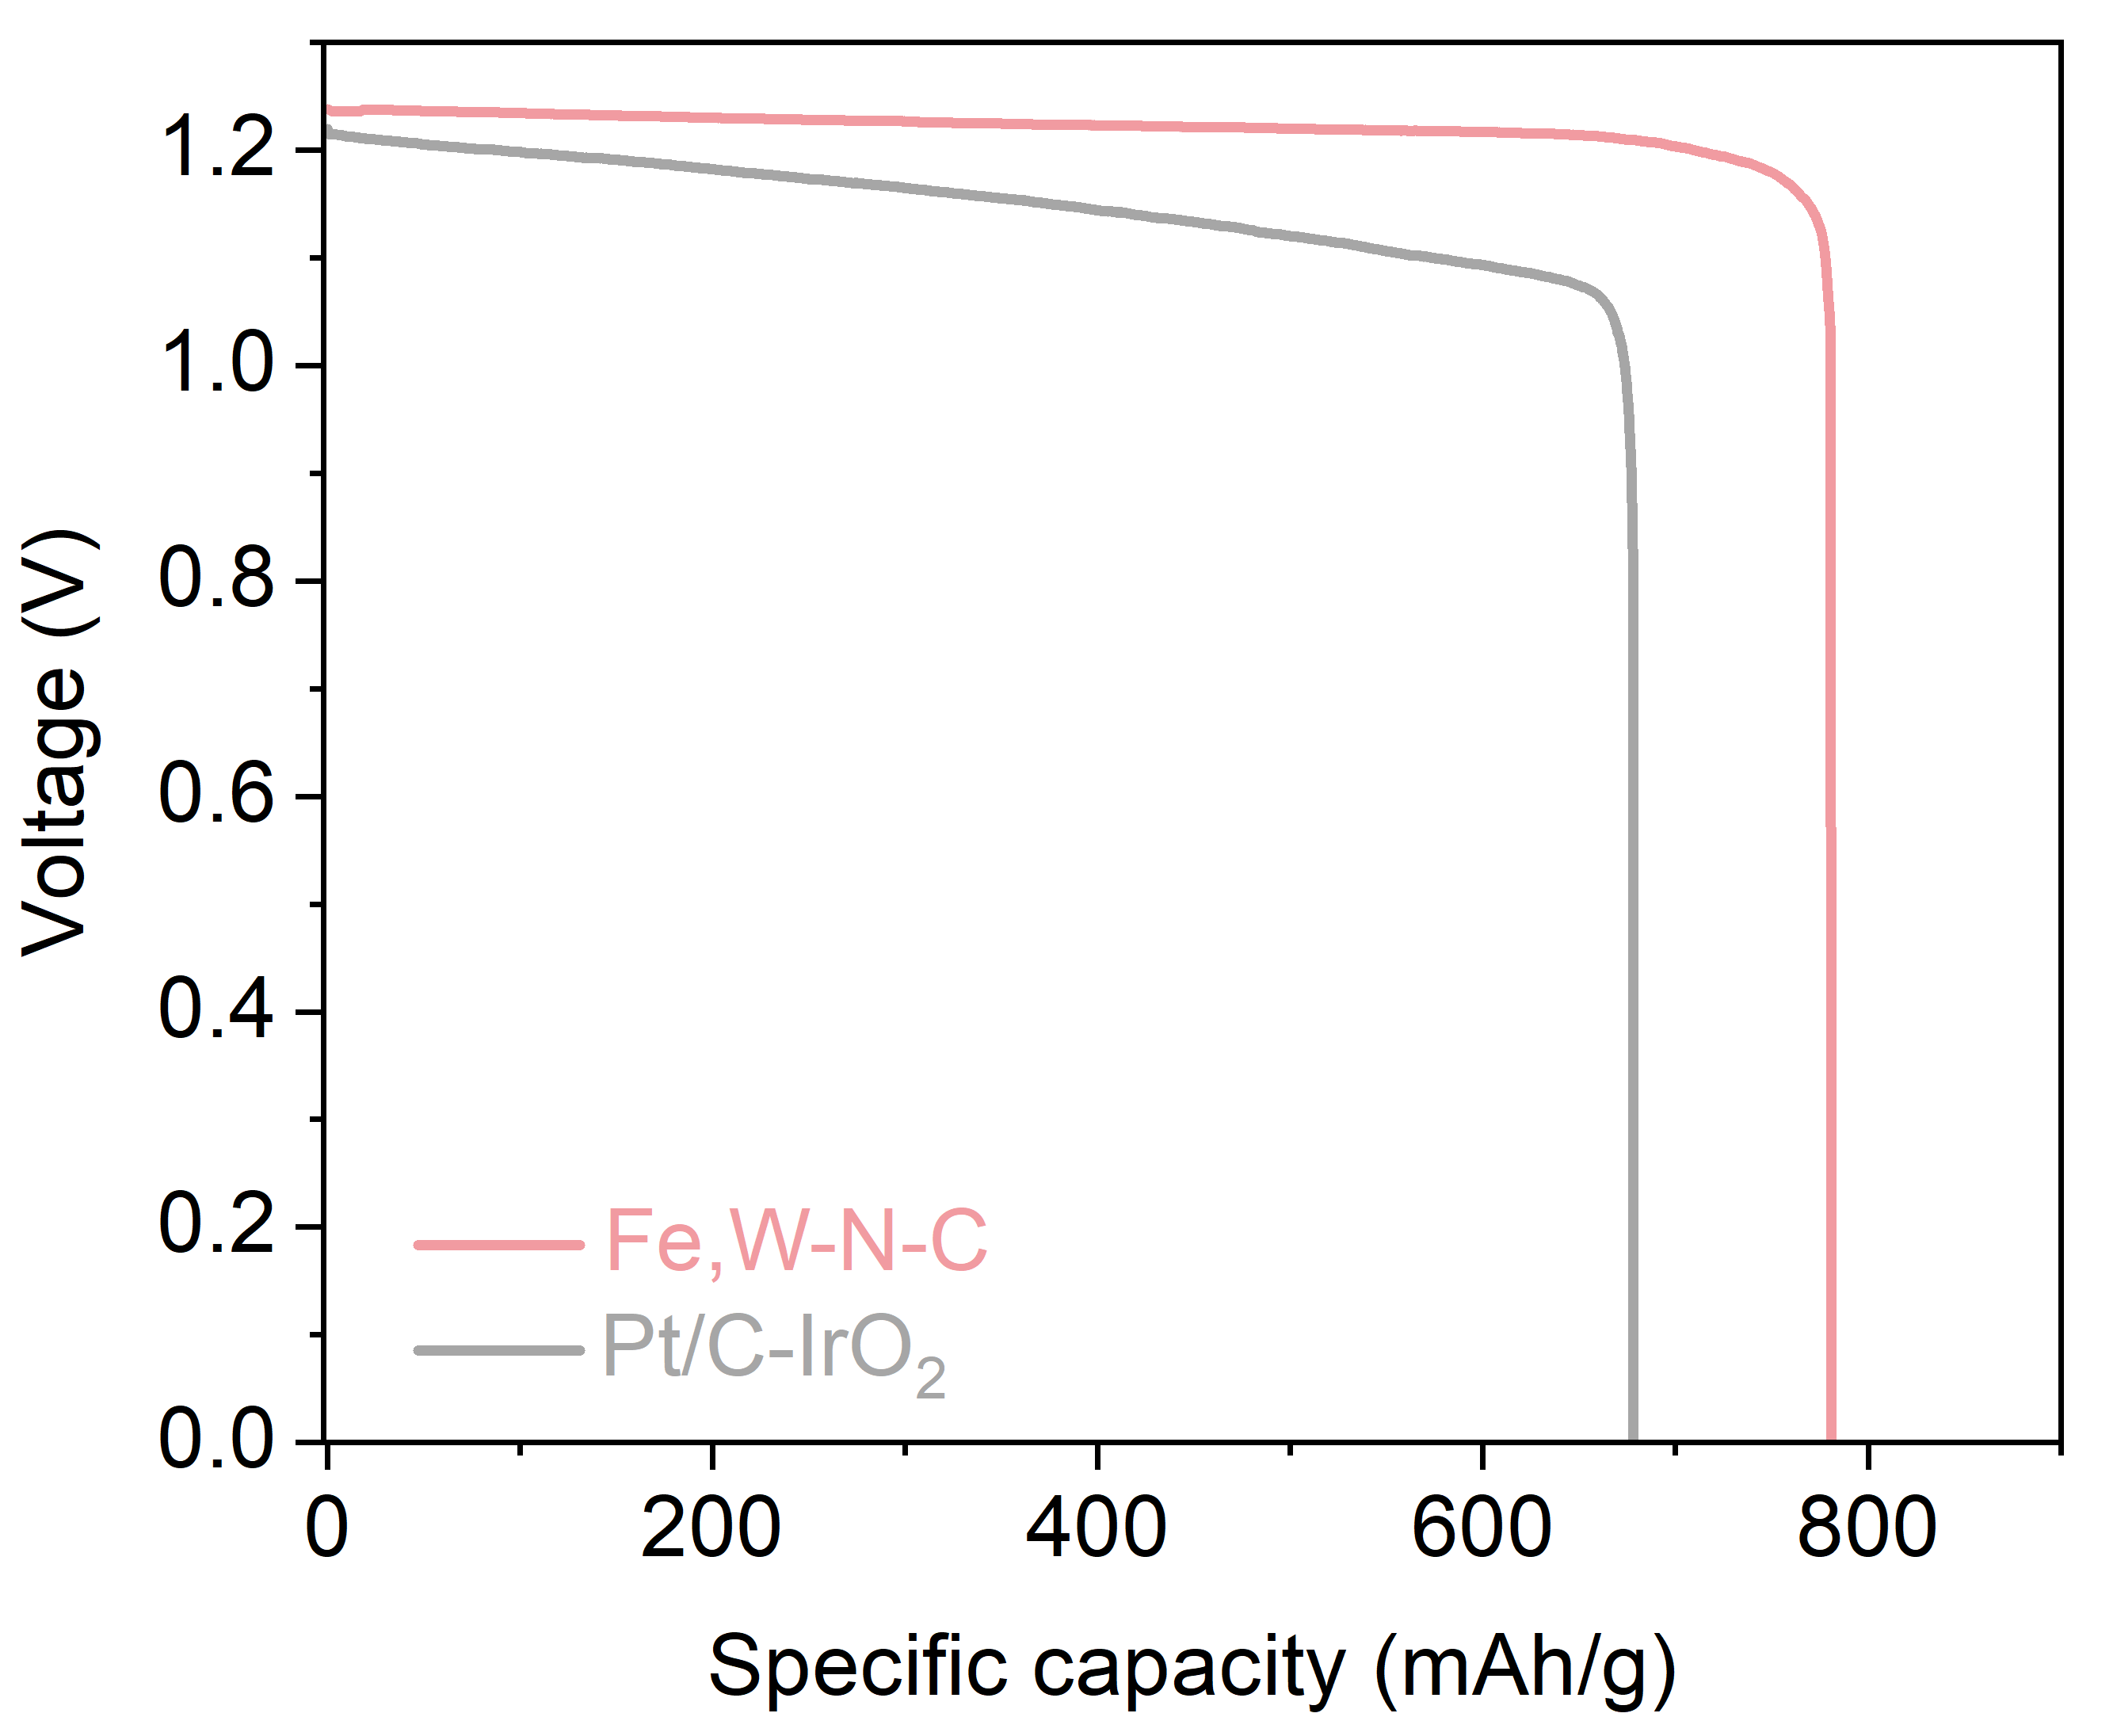


**Supplementary Fig. 21.** Specific capacity of zinc-air batteries (ZABs) with Fe,W-N-C catalyst and commercial Pt/C-IrO2 catalyst as the air cathode.

**
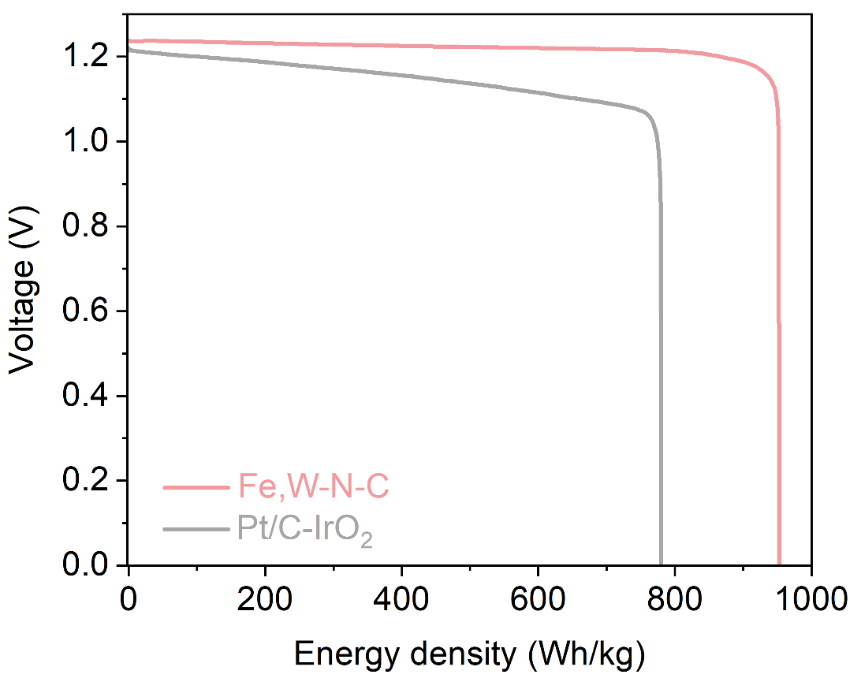
**

**Supplementary Fig. 22.** Energy density plots of ZABs with Fe,W-N-C catalyst and commercial Pt/C-IrO2 catalyst as the air cathode.

**
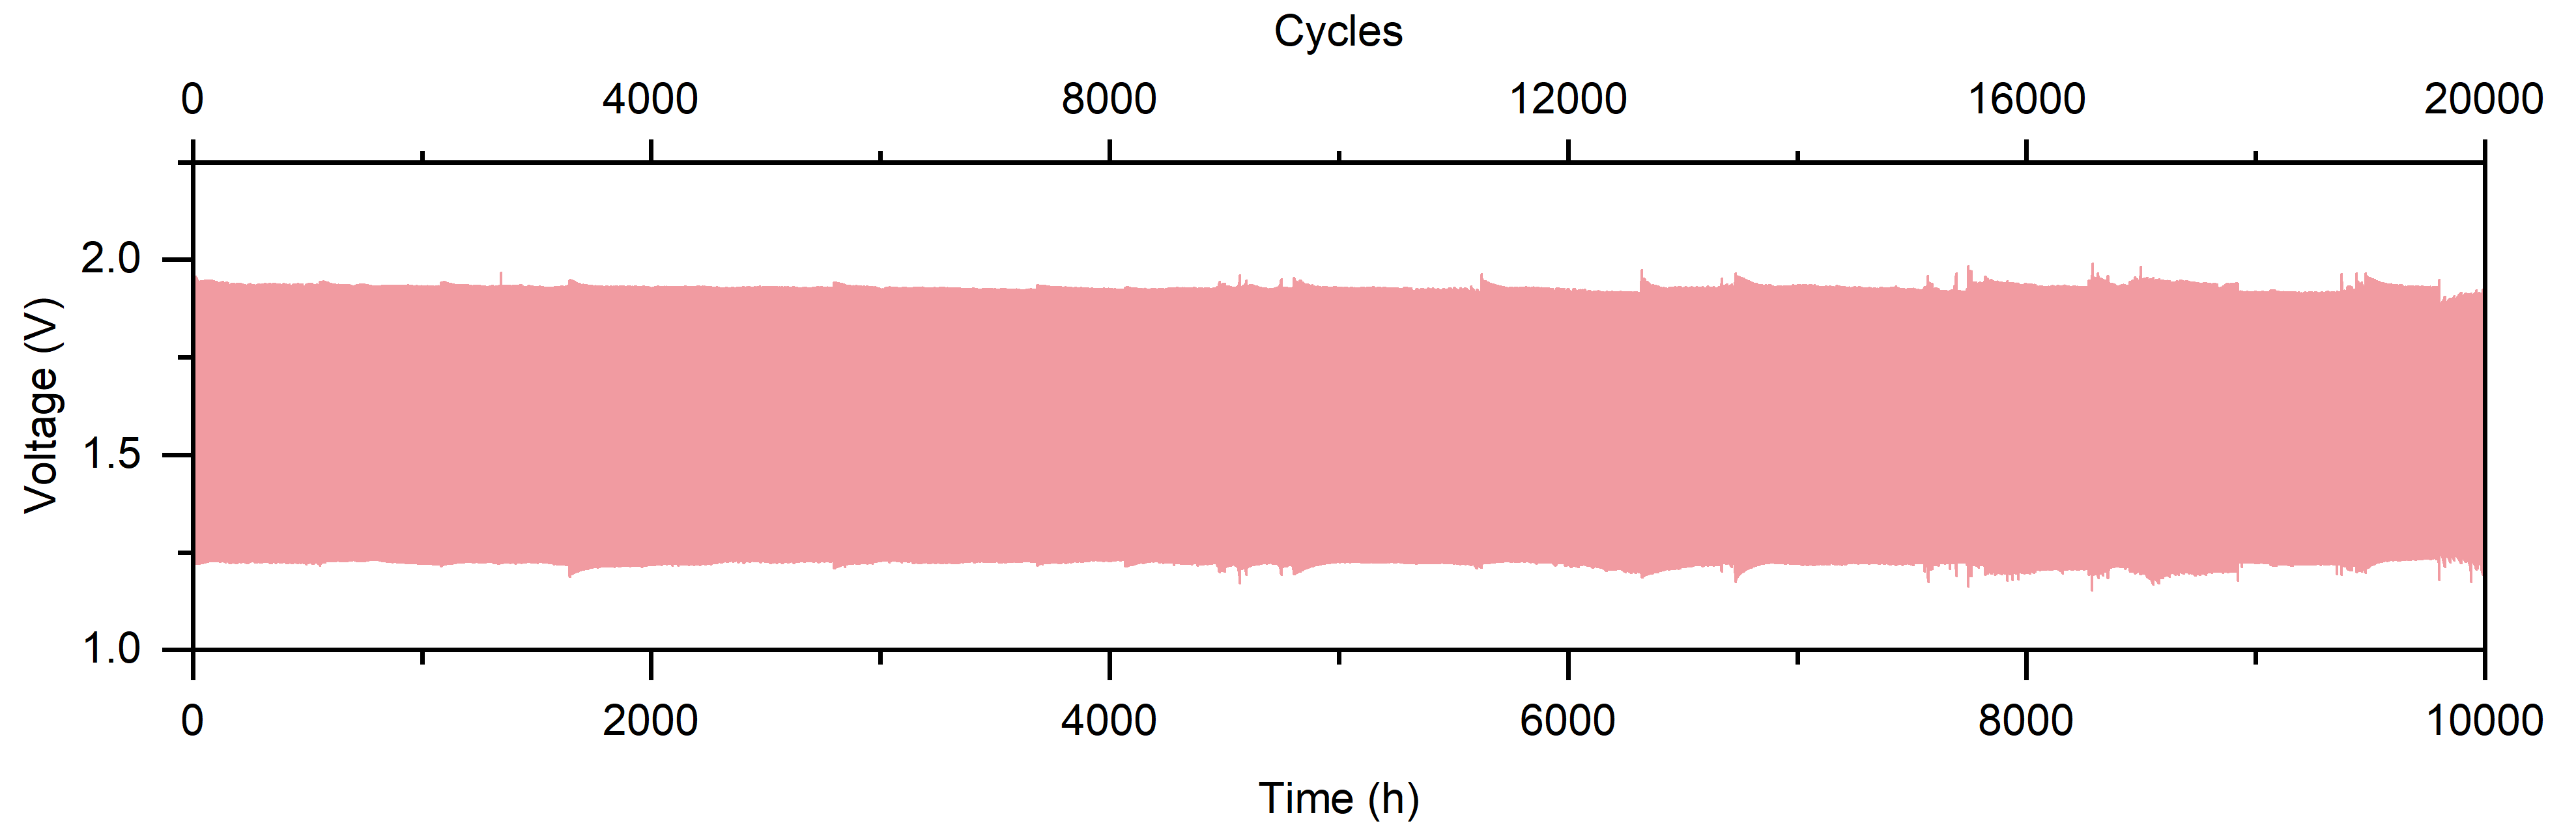
**

**Supplementary Fig. 23.** Repeated galvanostatic discharge/charge cycle stability test for liquid-state ZAB with Fe,W-N-C air cathode at a current density of 5 mA cm-2.

**
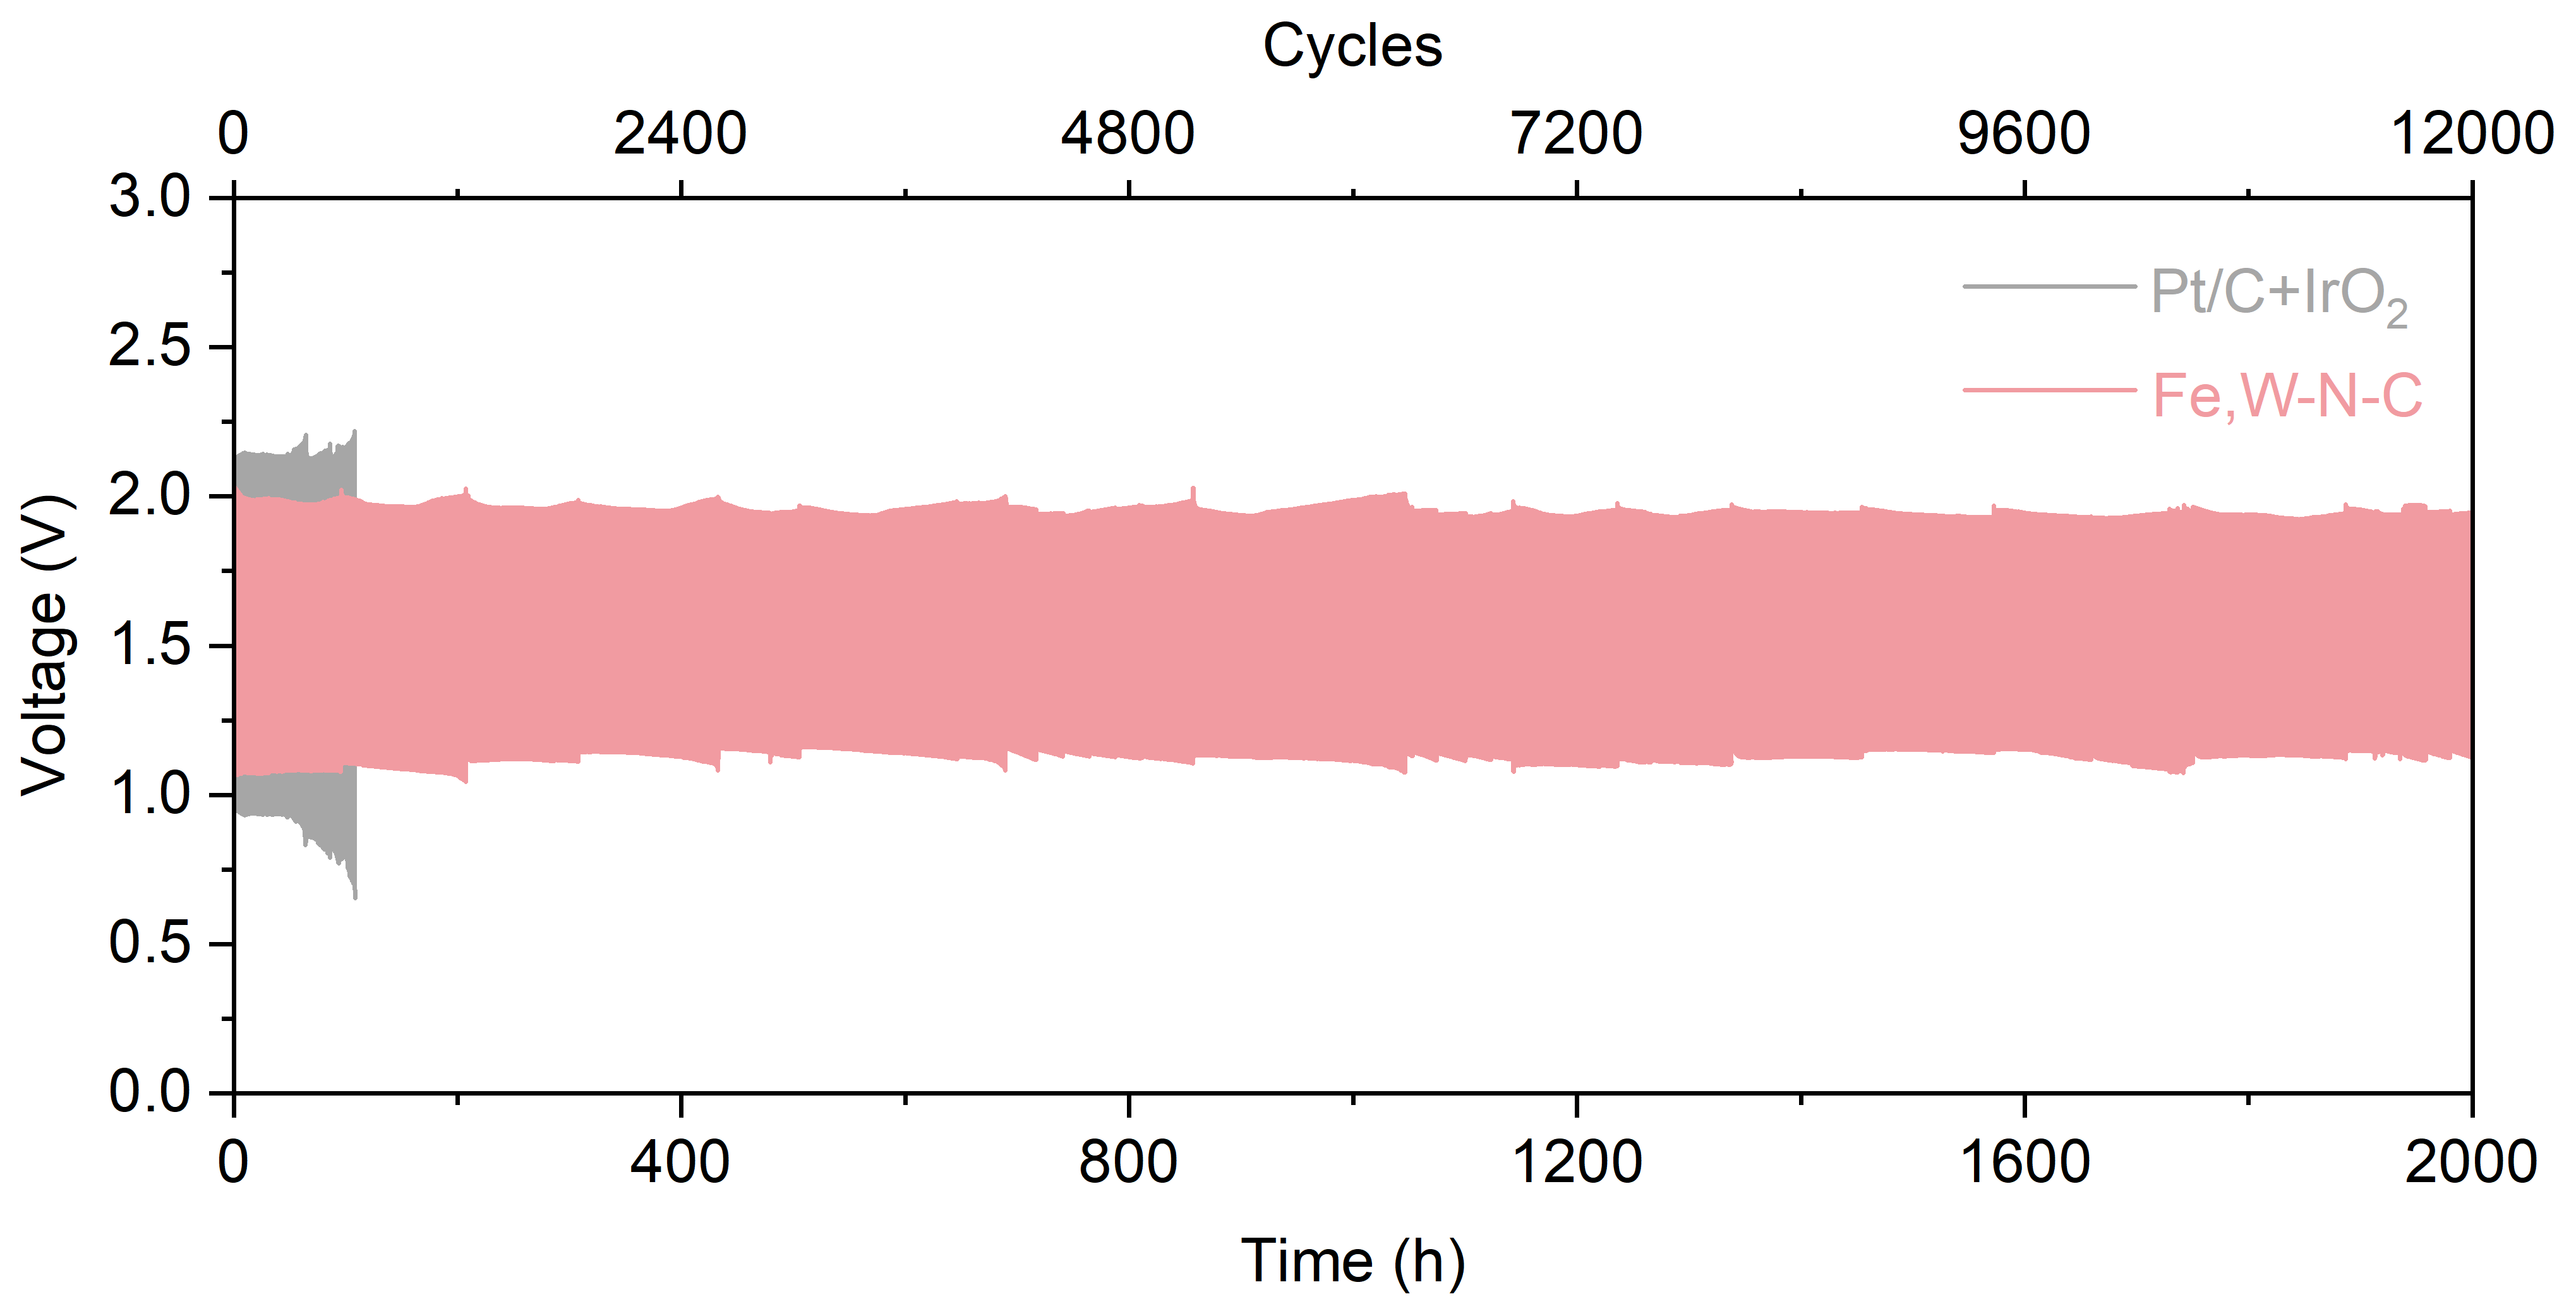
**

**Supplementary Fig. 24.** Galvanostatic discharge/charge cycle stabilities for liquid-state ZABs with Fe,W-N-C and Pt/C-IrO2 air cathodes at a current density of 50 mA cm-2.

**
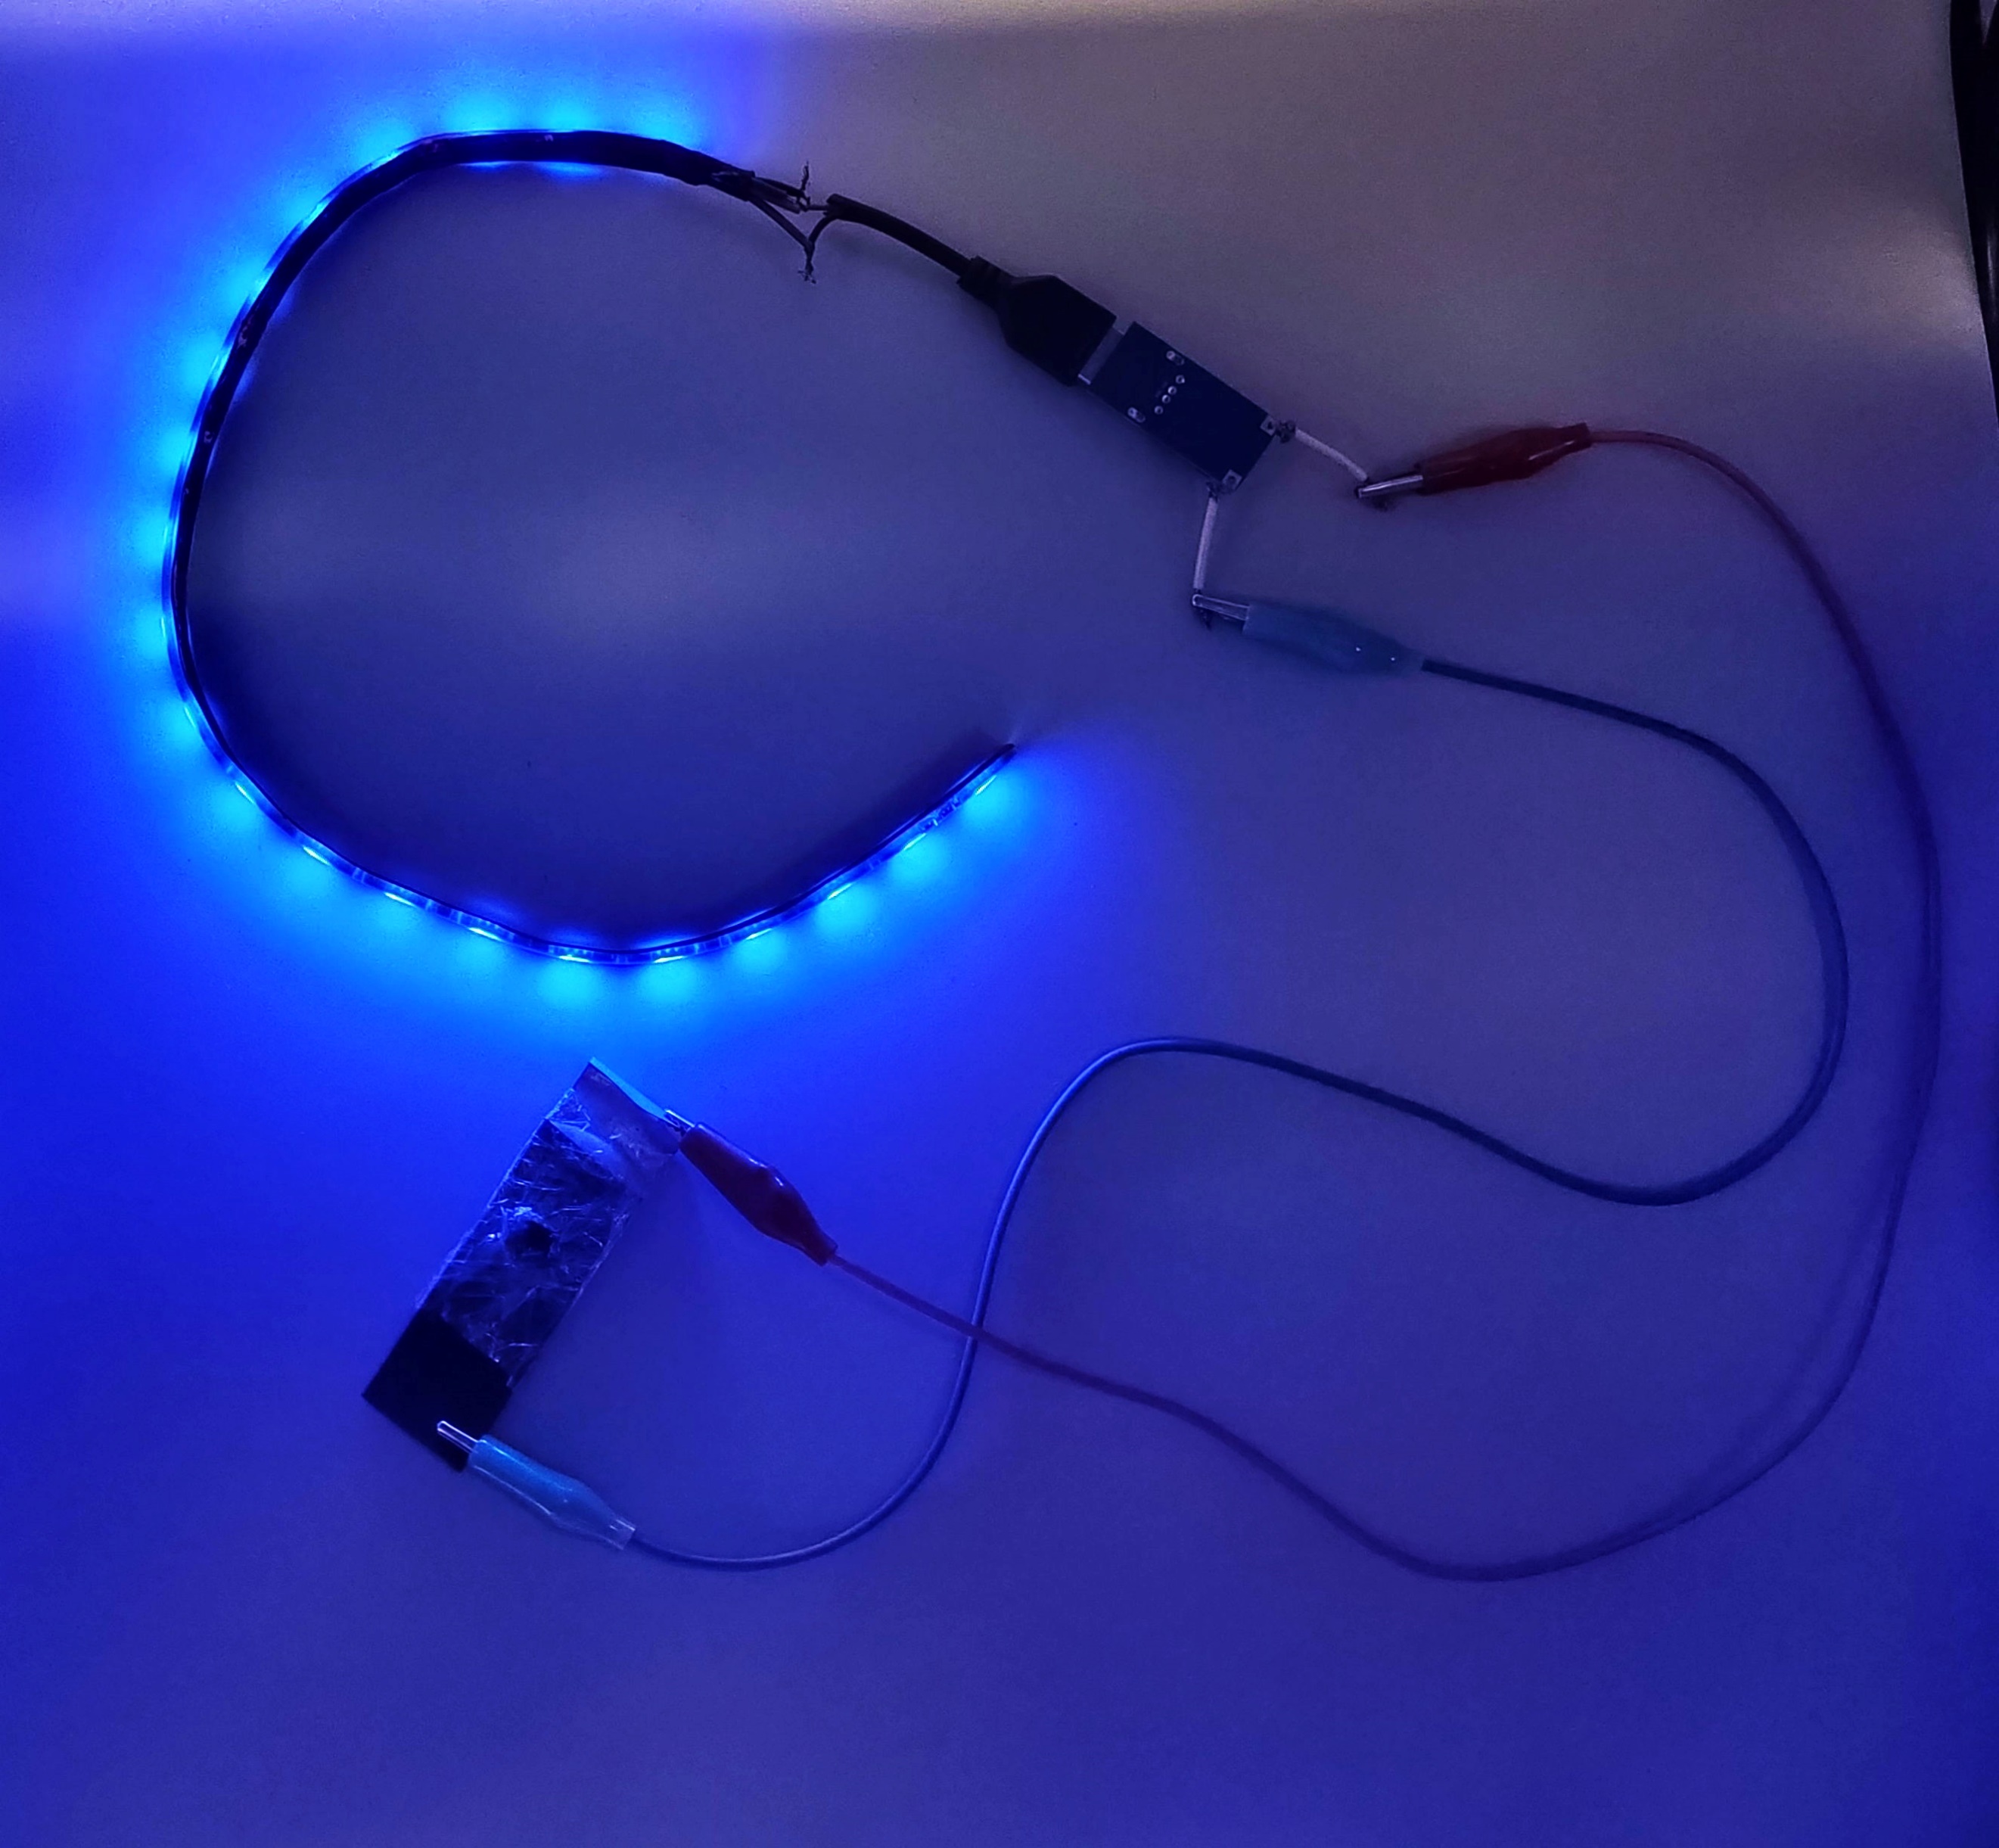
**

**Supplementary Fig. 25.** Photograph of a wristband with LED lights powered by the flexible solid-state ZAB with Fe,W-N-C catalyst as the air cathode.


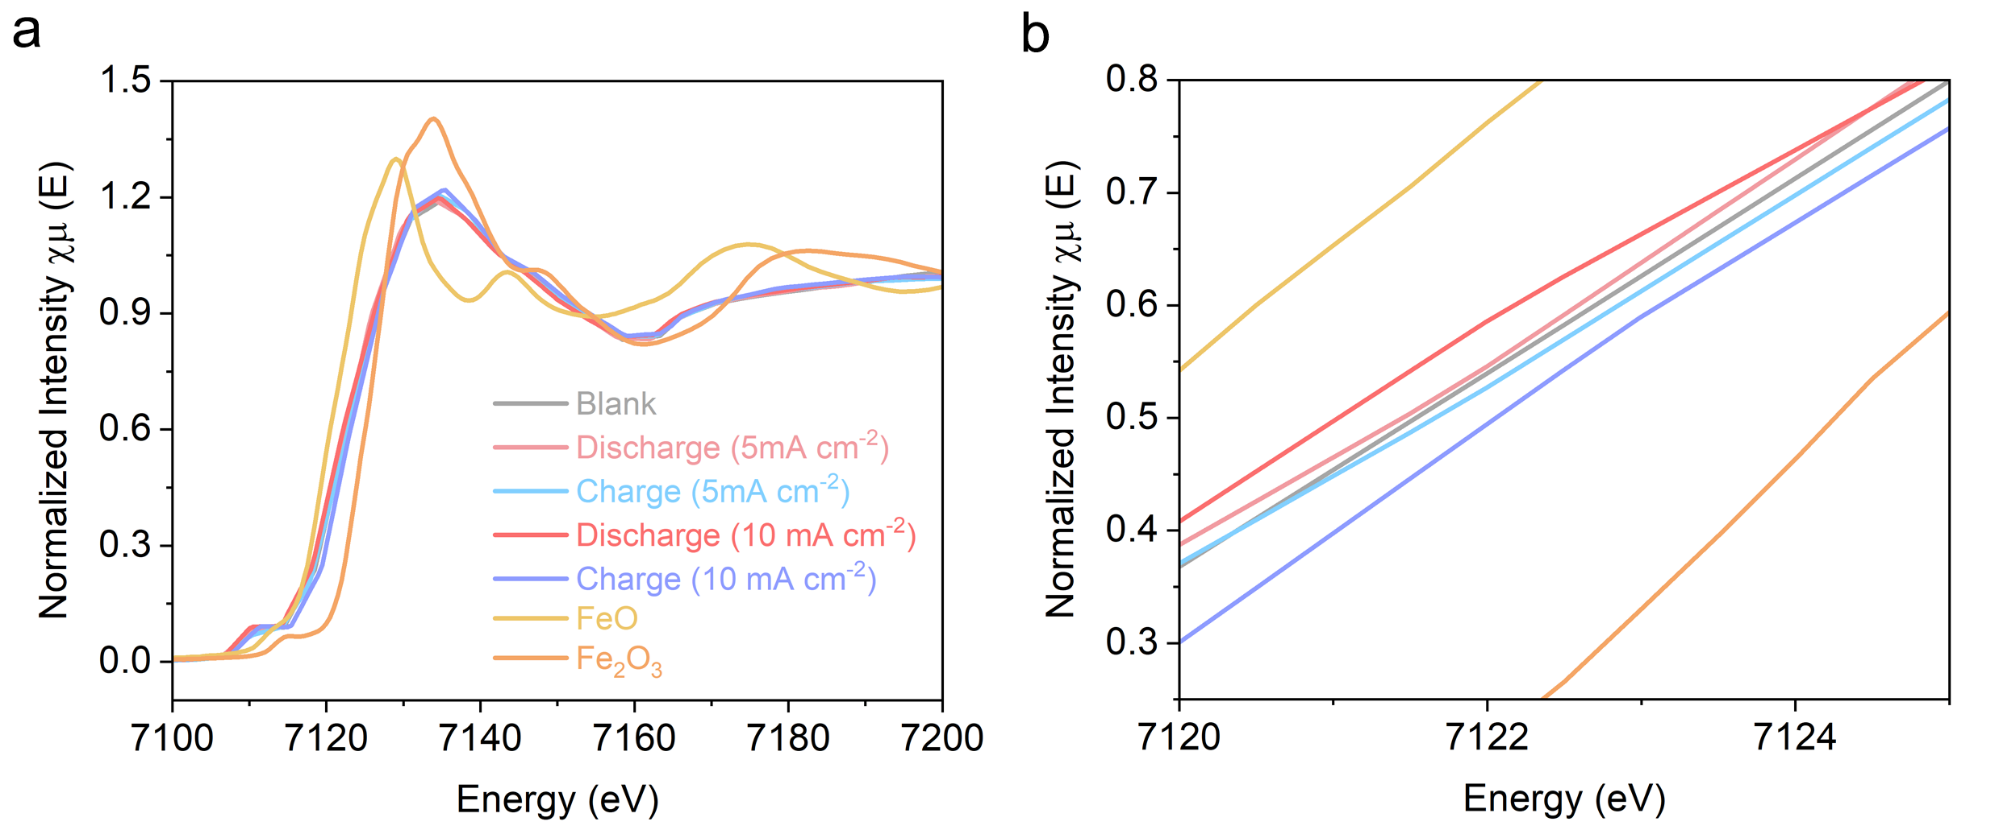


**Supplementary Fig. 26.** In situ XAS characterizations. **a**, Fe K-edge XANES spectra of Fe,W-N-C based ZAB during charge and discharge processes at different current densities. **b**, Enlarged view of the adsorption edge of XANES spectra.


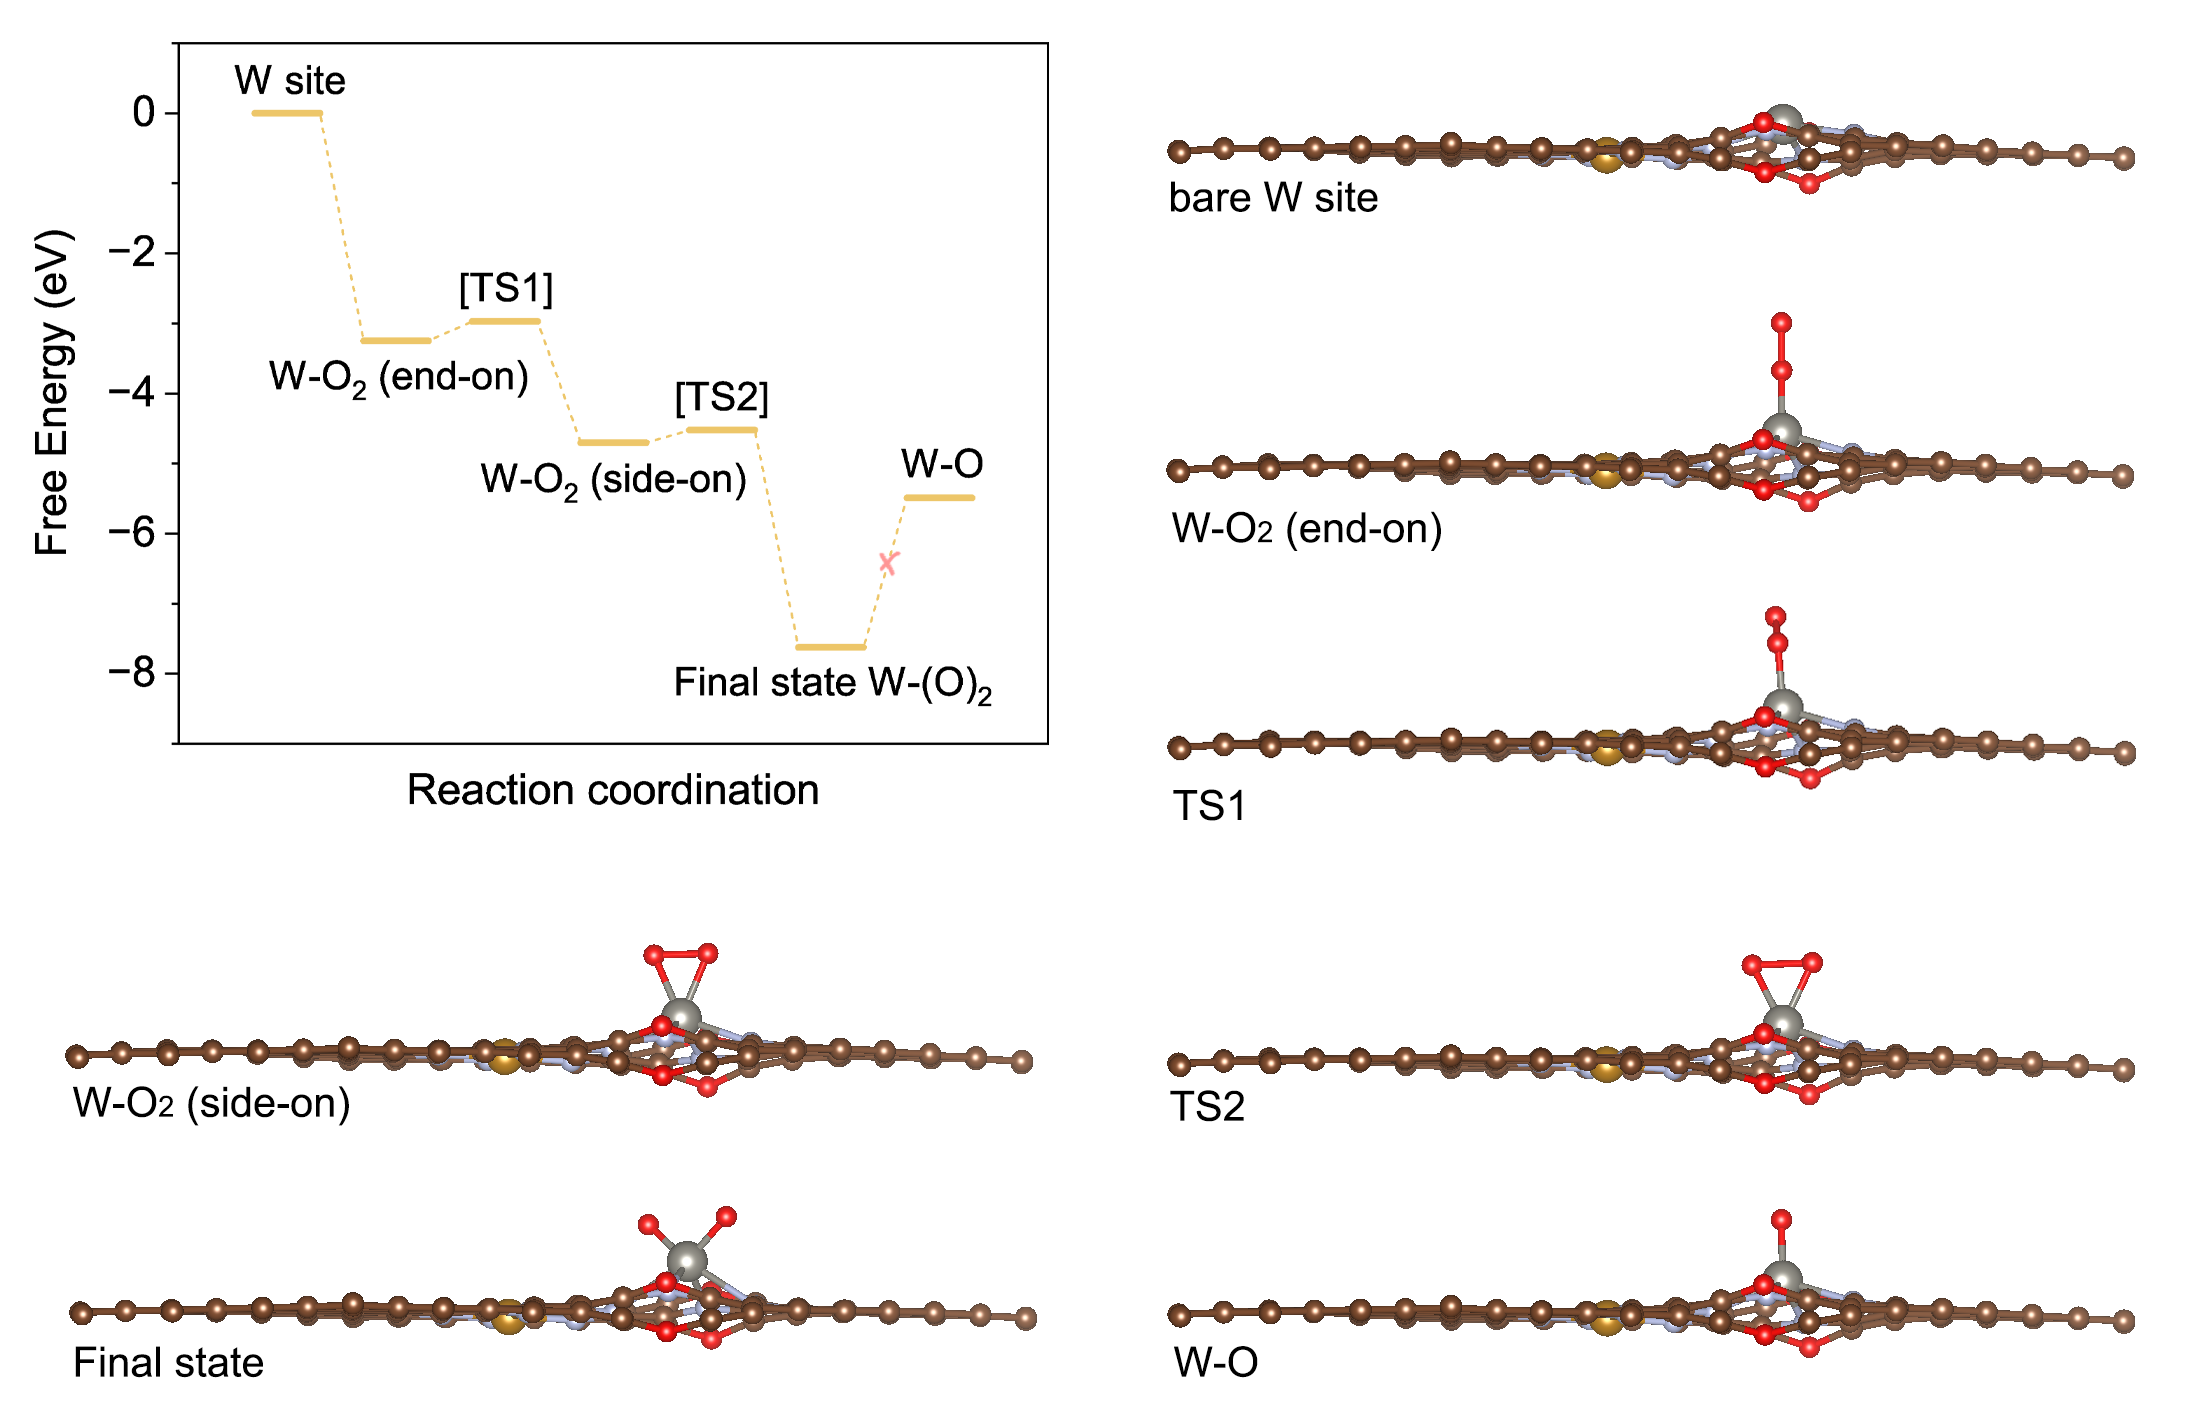


**Supplementary Fig. 27.** The atomistic structure and free energy of the initial, transition, and final states of the adsorption and dissociation reactions of O2 on the W-N4 site in Fe,W-N-C catalyst.

**
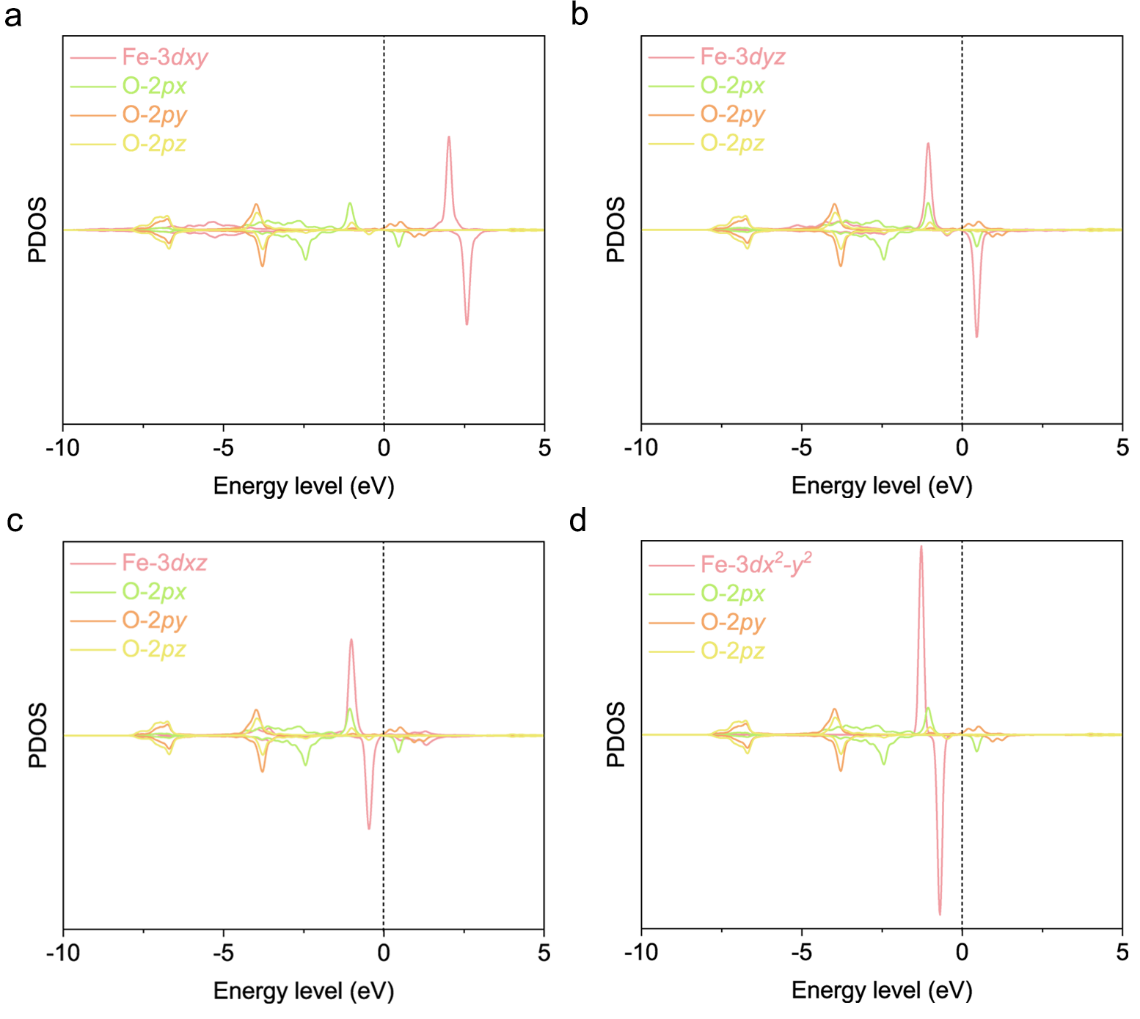
**

**Supplementary Fig. 28.** Projected density of state analysis of (**a**) Fe-3*dxy*, (**b**) Fe-3*dyz*, (**c**) Fe-3*dxz* and (**d**) Fe-3*dx2-y2* orbitals with O 2*px*/2*py*/2*pz* orbitals in *OH intermediate on Fe-N4/W-N4 site.

**
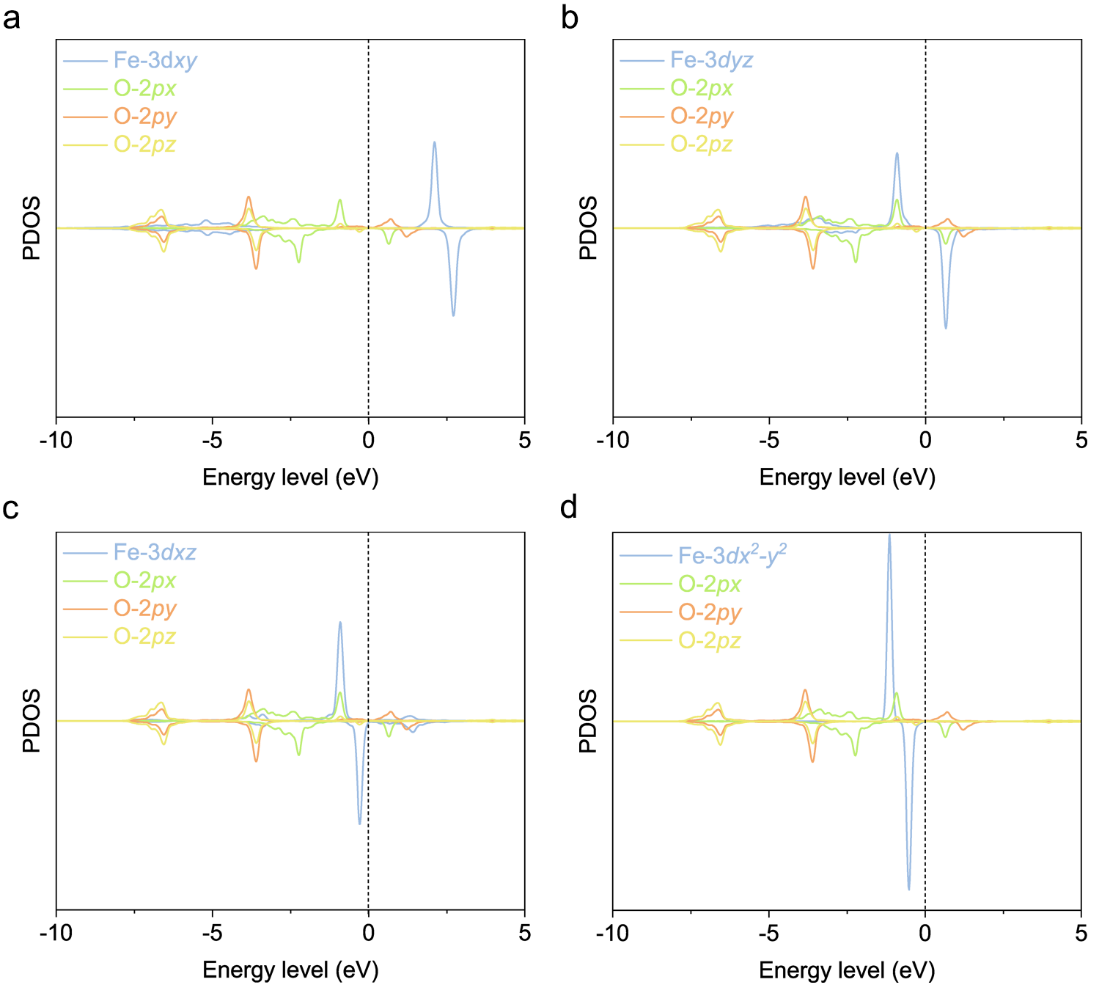
**

**Supplementary Fig. 29.** Projected density of state analysis of (**a**) Fe-3*dxy*, (**b**) Fe-3*dyz*, (**c**) Fe-3*dxz* and (**d**) Fe-3*dx2-y2* orbitals with O 2*px*/2*py*/2*pz* orbitals in *OH intermediate on Fe-N4 site.

**Supplementary Tables**

**Supplementary Table 1**. Inductively coupled plasma-optical emission spectroscopy (ICP-OES) analysis results of the as-prepared catalysts.

| Catalyst | M (M=Fe/Co/Ni, wt%) | W (wt%) |
| --- | --- | --- |
| Fe,W-N-C | 1.25 | 4.02 |
| Fe,WC-N-C | 1.56 | 5.49 |
| Fe-N-C | 1.34 | N/A |
| W-N-C | N/A | 4.76 |
| WC-N-C | N/A | 6.23 |
| Co,W-N-C | 1.18 | 4.06 |
| Ni,W-N-C | 1.30 | 4.04 |

**Supplementary Table 2**. Extended X-ray absorption fine structure (EXAFS) fitting parameters for Fe foil, WO3 and Fe,W-N-C catalyst.

| Sample | Bond Type | Coordination Number | Bond Length  R (Å) | Bond disorder  σ2 (Å2) | *R* factor |
| --- | --- | --- | --- | --- | --- |
| Fe foil | Fe-Fe | 8 | 2.47±0.02 | 0.0049 | 0.0023 |
| Fe-Fe | 6 | 2.85±0.01 | 0.0062 |
| Fe,W-N-C | Fe-N | 4 | 1.90±0.06 | 0.0027 | 0.0107 |
| Fe-C | 4 | 2.69±0.08 | 0.0057 |
| Fe-C | 4 | 3.01±0.09 | 0.0025 |
| Fe-N (bond with W) | 1 | 3.33±0.04 | 0.0023 |
| WO3 | W-O | 4 | 1.80±0.01 | 0.0054 | 0.0072 |
| W-O | 2 | 2.15±0.03 | 0.0052 |
| Fe,W-N-C | W-N | 4 | 2.08±0.09 | 0.0014 | 0.0164 |
| W-C | 4 | 2.88±0.04 | 0.0025 |
| W-C | 4 | 3.21±0.06 | 0.0054 |
| W-C | 4 | 3.65±0.06 | 0.0007 |
| W-N (bond with Fe) | 1 | 4.29±0.05 | 0.0055 |

**Supplementary Table 3**. Summary of the onset potential (Eonset), half-wave potential (E1/2), and Jk at 0.82 V of different catalysts.

| Sample | *Eonset* Potential  (V, V versus RHE) | *E1/2* Potential  (V, V versus RHE) | *Jk*  (mA cm-2) |
| --- | --- | --- | --- |
| Fe,W-N-C | 1.03 | 0.90 | 17.14 |
| Fe,WC-N-C | 1.00 | 0.87 | 13.96 |
| Fe-N-C | 0.99 | 0.84 | 7.26 |
| W-N-C | 0.90 | 0.79 | 1.59 |
| WC-N-C | 0.88 | 0.77 | 1.10 |
| Pt/C | 1.01 | 0.85 | 9.64 |

**Supplementary Table 4**. Summary of Tafel slopes for ORR of the as-prepared catalysts.

|  | Fe,W-N-C | Fe,WC-N-C | Fe-N-C | W-N-C | WC-N-C | Pt/C |
| --- | --- | --- | --- | --- | --- | --- |
| Tafel Slope  (mV/dec) | 91 | 99 | 101 | 63 | 64 | 98 |

**Supplementary Table 5**. ORR electrocatalytic performance comparison of Fe,W-N-C with other state-of-the-art catalysts in 0.1 M KOH.

| Catalyst | Loading Amount  (mg cm-2) | Eonset | E1/2 | Stability | Ref. |
| --- | --- | --- | --- | --- | --- |
| **Fe,W-N-C** | **0.2** | **1.03** | **0.90** | **97.94% after 36000 s** | **This Work** |
| Co(CN)3-Cub | 2.04 | 0.99 | 0.90 | E1/2 −20 mV after 10000 cycles | [1]  *Nat. Catal.* **6**, 1164-1173 (2023) |
| HESA | 0.127 | 0.96 | 0.87 | 97% after 43200 s | [2]  *Nat. Sustain*. **6**, 816-826 (2023) |
| (101) copper phosphosulfide | 0.1 | - | 0.90 | E1/2 −11 mV after 30000 cycles | [3]  *Nat. Energy* **6**, 592-604 (2021) |
| ZrN NPs | 0.125 | 0.89 | 0.80 | 95.6% after 36 h | [4]  *Nat. Mater.* **19**, 282-286 (2020) |
| 4.3% NiFe-MOF | 2.0 | 0.92 | 0.83 | 97% after 200 h | [5]  *Nat. Energy* **4**, 115-122 (2019) |
| NFLGDY-900c | 0.6 | - | 0.87 | 92% after 10000 s | [6]  *Nat. Chem.* **10**, 924-931 (2018) |
| FeCo-NCH | 0.33 | - | 0.889 | E1/2 −8 mV after 10000 cycles | [7]  *Nat. Commun.* **14**, 1822 (2023) |
| HESACs (FeCoNiCuMn) | 0.18 | 0.999 | 0.887 | 93.33% after 25000 s | [8]  *Nat. Commun.* **13**, 5071 (2022) |
| Co SA-NDGs | 0.3 | 1.02 | - | E1/2 −11 mV after 5000 cycles | [9]  *Nat. Commun.* **13**, 3689 (2022) |
| P/Fe-N-C | 0.6 | 1.01 | 0.90 | E1/2 −2 mV after 36000 s | [10]  *J. Am. Chem. Soc.* **145**, 3647-3655 (2023) |
| MNCSs | 0.126 | - | 0.82 | E1/2 −6mV after 5000 cycles | [11]  *J. Am. Chem. Soc.* **144**, 11767-11777 (2022) |
| Co-Fe ZIF (S-CFZ) | 0.3 | - | 0.85 | 91% after 100 h | [12]  *J. Am. Chem. Soc.* **144**, 4783-4791 (2022) |
| Fe-Co-Ni MOF | 0.28 | 0.82 | 0.75 | - | [13]  *J. Am. Chem. Soc.* **144**, 3411-3428 (2022) |
| Ru-SAS/SNC | 0.4 | 0.998 | 0.861 | E1/2 −24 mV after 30000 cycles | [14]  *J. Am. Chem. Soc.* **144**, 2197–2207 (2022) |
| Mn-RuO2 | 0.2 | - | 0.86 | 95.5% after 50 h | [15]  *J. Am. Chem. Soc.* **144**, 2694−2704 (2022) |
| FeCo-NPC | 0.51 | 0.96 | 0.83 | no obvious change after 30000 s | [16]  *Adv. Mater.* **36**, 2306047 (2024) |
| YN4-Cl | 0.41 | 0.93 | 0.85 | 95% after 43200 s | [17]  *Adv. Mater.* **35**, 2300381 (2023) |
| FeH-N-C | 0.6 | - | 0.91 | E1/2 −29 mV after 100000 cycles | [18]  *Adv. Mater.* **35**, 2210714 (2023) |
| H-3DOM-Co/ONC | 0.2 | 0.94 | 0.84 | 94% after 30000 s | [19]  *Adv. Mater.* **35**, 2301894 (2023) |
| V-CMO/5rGO | 0.255 | - | 0.86 | 90% after 36000 s | [20]  *Adv. Mater.* **35**, 2303109 (2023) |
| DAF-COF | 0.167 | 0.89 | 0.74 | 94.3% after 36000 s | [21]  *Adv. Mater.* **35**, 2209129 (2023) |
| Fe-Zn@SNC | 0.51 | 0.99 | 0.86 | E1/2 −25 mV after 2000 cycles | [22]  *Angew. Chem. Int. Ed.* **135**, e202301833 (2023) |
| Pd-Gd2O3/C | 0.255 | 0.986 | 0.877 | 90.1 % after 39600 s | [23]  *Angew. Chem. Int. Ed.* **62**, e202314565 (2023) |
| Mn-SAS | - | 0.99 | 0.85 | 98.5% after 22000 s | [24]  *Angew. Chem. Int. Ed.* **62**, e202314933 (2023) |

**Supplementary Table 6**. Summary of the potential at a constant current density of 10 mA cm-2 (EJ=10) and Tafel slopes for OER of the as-prepared catalysts.

|  | Fe,W-N-C | Fe,WC-N-C | Fe-N-C | W-N-C | WC-N-C | IrO2 |
| --- | --- | --- | --- | --- | --- | --- |
| EJ=10 (V) | 1.56 | 1.68 | 1.81 | 1.64 | 1.72 | 1.59 |
| Tafel Slope (mV/dec) | 63 | 157 | 220 | 129 | 132 | 92 |

**Supplementary Table 7**.The zinc-air batteries performance comparison of Fe,W-N-C with other state-of-the-art catalysts.

| Catalyst | Loading Amount  (mg cm-2) | Cycling Stability  (h/cycles) | Current Density  (mA cm-2) | Ref. |
| --- | --- | --- | --- | --- |
| **Fe,W-N-C** | **0.5** | **Over 10,000 h**  **(20,000 cycles)** | **5** | **This work** |
| **1.0** | **Over 2,000 h**  **12,000 cycles** | **50** |
| HESA (FeMnCoNiCu) | 1.0 | 200 h | 2 | *[2]*  *Nat. Sustain.* **6**, 816-826 (2023) |
| (101)-copper phosphosulfide | 15.0 | 800 h | 25 | *[3]*  *Nat. Energy* **6**, 592-604 (2021) |
| ZrN nanoparticles | 1.0 | 100 h | 10 | *[4]*  *Nat. Mater.* **19**, 282-286 (2020) |
| PdMo bimetallene/C | 1.0 | 500 h | 10 | *[25]*  *Nature* **574**, 81-85 (2019) |
| CuNa-CF | 0.2 | 5000 h | 1 | *[26]*  *Nat. Commun. 15, 8365 (2024).* |
| FeCo-NCH | 1.0 | 100 h | 5 | *[7]*  *Nat. Commun.* **14**, 1822 (2023) |
| P/Fe-N-C | 1.0 | 192 h | 10 | *[10]*  *J. Am. Chem. Soc.***145**, 3647-3655 (2023) |
| Ru SAS/SNC | 1.0 | 270 h | 5 | *[14]*  *J. Am. Chem. Soc.* **144**, 2197-2207 ( 2022) |
| Fe-Co-Ni MOF | 1.0 | 120 h | 5 | *[13]*  *J. Am. Chem. Soc.* **144**, 3411-3428 ( 2022) |
| FeCo-NPC | 10 | 60 h | 10 | *[16]*  *Adv. Mater.* **36**, 2306047 (2024) |
| FeH-N-C | 1.0 | 1200 h | 5 | *[18]*  *Adv. Mater.* **35**, 2210714 (2023) |
| VMoON@NC | 2.0 | 630 h | 10 | *[27]*  *Adv. Mater.* **35**, 2302625 (2023) |
| CuCo2O4-xSx/NC-2 | 6.0 | 300 h | 10 | *[28]*  *Adv. Mater.* **35**, 2370257 (2023) |
| Cu-Co/NC | 1.0 | 510 h | 10 | *[29]*  *Adv. Mater.* **35**, 2300905 (2023) |
| T-Fe SAC | 4.0 | 350 h | 20 | *[30]*  *Angew. Chem. Int. Ed.* **136**, e202319370 (2024) |
| Fe-SA/N-HCS | 1.0 | 400 h | 5 | *[31]*  *Angew. Chem. Int. Ed.* **135**, e202309784 (2023) |
| ZnCo2O4−xFx/CNTs | 6.0 | 300 h | 5 | *[32]*  *Angew. Chem. Int. Ed.* **62**, e202301408 (2023) |
| Pd-Gd2O3/C+RuO2 | - | 580 h | 5 | *[23]*  *Angew. Chem. Int. Ed.* **62**, e202314565 (2023) |

**Reference**

[1] Sun, K. et al. Co(CN)3 catalysts with well-defined coordination structure for the oxygen reduction reaction. *Nat. Catal.* **6**, 1164-1173 (2023).

[2] Lei, X. et al. High-entropy single-atom activated carbon catalysts for sustainable oxygen electrocatalysis. *Nat. Sustain.* **6**, 816-826 (2023).

[3] Shinde, S. S. et al. Ampere-hour-scale zinc–air pouch cells. *Nat. Energy* **6**, 592-604 (2021).

[4] Yuan, Y. et al. Zirconium nitride catalysts surpass platinum for oxygen reduction. *Nat. Mater.* **19**, 282-286 (2020).

[5] Cheng, W. et al. Lattice-strained metal–organic-framework arrays for bifunctional oxygen electrocatalysis. *Nat. Energy* **4**, 115-122 (2019).

[6] Zhao, Y. et al. Few-layer graphdiyne doped with sp-hybridized nitrogen atoms at acetylenic sites for oxygen reduction electrocatalysis. *Nat. Chem.* **10**, 924-931 (2018).

[7] Jiang, Z. et al. Interfacial assembly of binary atomic metal-Nx sites for high-performance energy devices. *Nat. Commun.* **14**, 1822 (2023).

[8] Rao, P. et al. Movable type printing method to synthesize high-entropy single-atom catalysts. *Nat. Commun.* **13**, 5071 (2022).

[9] Wang, Q. et al. Quasi-solid-state Zn-air batteries with an atomically dispersed cobalt electrocatalyst and organohydrogel electrolyte. *Nat. Commun.* **13**, 3689 (2022).

[10] Zhou, Y. et al. Boosting oxygen electrocatalytic activity of Fe–N–C catalysts by phosphorus incorporation. *J. Am. Chem. Soc.* **145**, 3647-3655 (2023).

[11] Zhao, Z. et al. Constructing unique mesoporous carbon superstructures via monomicelle interface confined assembly. *J. Am. Chem. Soc.* **144**, 11767-11777 (2022).

[12] Jiang, Y. et al. Linker-compensated metal-organic framework with electron delocalized metal sites for bifunctional oxygen electrocatalysis. *J. Am. Chem. Soc.* **144**, 4783-4791 (2022).

[13] Shahbazi Farahani, F. et al. Trilayer metal-organic frameworks as multifunctional electrocatalysts for energy conversion and storage applications. *J. Am. Chem. Soc.* **144**, 3411-3428 (2022).

[14] Qin, J. et al. Altering ligand fields in single-atom sites through second-shell anion modulation boosts the oxygen reduction reaction. *J. Am. Chem. Soc.* **144**, 2197–2207 (2022).

[15] Zhou, C. et al. Superdurable bifunctional oxygen electrocatalyst for high-performance zinc–air batteries. *J. Am. Chem. Soc.* **144**, 2694−2704 (2022).

[16] Pei, Z. et al. Atomically dispersed Fe sites regulated by adjacent single Co atoms anchored on N‐P Co‐doped carbon structures for highly efficient oxygen reduction reaction. *Adv. Mater.* **36**, 2306047 (2024).

[17] Ji, B. et al. Coordination chemistry of large‐sized yttrium single‐atom catalysts for oxygen reduction reaction. *Adv. Mater.* **35**, 2300381 (2023).

[18] Tian, H. et al. High durability of Fe–N–C single‐atom catalysts with carbon vacancies toward the oxygen reduction reaction in alkaline media. *Adv. Mater.* **35**, 2210714 (2023).

[19] Yao, W. et al. Hierarchically ordered macro–mesoporous electrocatalyst with hydrophilic surface for efficient oxygen reduction reaction*. Adv. Mater.* **35**, 2301894 (2023).

[20] Huang, H. et al. Tailoring oxygen reduction reaction kinetics on perovskite oxides via oxygen vacancies for low‐temperature and knittable zinc–air batteries*. Adv. Mater.* **35**, 2303109 (2023).

[21] You, Z. et al. Metal‐free carbon‐based covalent organic frameworks with heteroatom‐free units boost efficient oxygen reduction. *Adv. Mater.* **35**, 2209129 (2023).

[22] Xie, Y. et al. Direct oxygen‐oxygen cleavage through optimizing interatomic distances in dual single‐atom electrocatalysts for efficient oxygen reduction reaction. *Angew. Chem. Int. Ed.* **135**, e202301833 (2023).

[23] Ning, S. et al. Importing antibonding‐orbital occupancy through Pd−O−Gd bridge promotes electrocatalytic oxygen reduction. *Angew. Chem. Int. Ed.* **62**, e202314565 (2023).

[24] Tong, M. et al. Potential dominates structural recombination of single atom Mn sites for promoting oxygen reduction reaction. *Angew. Chem. Int. Ed.* **62**, e202314933 (2023).

[25] Luo, M. et al. PdMo bimetallene for oxygen reduction catalysis. *Nature* **574**, 81-85 (2019).

[26] Li, Y. et al. Main-group element-boosted oxygen electrocatalysis of Cu-N-C sites for zinc-air battery with cycling over 5000 h. *Nat. Commun.* **15**, 8365 (2024).

[27] Balamurugan, J. et al. Electrocatalysts for zinc–air batteries featuring single molybdenum atoms in a nitrogen‐doped carbon framework. *Adv. Mater.* **35**, 2302625 (2023).

[28] Cai, J. et al. Hetero‐anionic structure activated Co-S bonds promote oxygen electrocatalytic activity for high‐efficiency zinc-air batteries. *Adv. Mater.* **35**, 2303488 (2023).

[29] Li, Z. et al. Geometric and electronic engineering of atomically dispersed copper‐cobalt diatomic sites for synergistic promotion of bifunctional oxygen electrocatalysis in zinc–air batteries. *Adv. Mater.* **35**, 2300905 (2023).

[30] Zhu, Y. et al. Tip‐like Fe-N4 sites induced surface microenvironments regulation boosts the oxygen reduction reaction. *Angew. Chem. Int. Ed.* **136**, e202319370 (2024).

[31] Zong, L. et al. Constructing Fe‐N4 sites through anion exchange‐mediated transformation of Fe coordination environments in hierarchical carbon support for efficient oxygen reduction. *Angew. Chem. Int. Ed.* **135**, e202309784 (2023).

[32] Xiao, K., Wang, Y., Wu, P., Hou, L., & Liu, Z. Q. Activating lattice oxygen in spinel ZnCo2O4 through filling oxygen vacancies with fluorine for electrocatalytic oxygen evolution. *Angew. Chem. Int. Ed.* **62**, e202301408 (2023).
